# Supplementary material for: Genome-Wide Plasma Cell-Free DNA Methylation Profiling Identifies Potential Biomarkers for Lung Cancer
Source: Dis Markers. 2019 Feb 5;2019:4108474. doi: 10.1155/2019/4108474 (PMC6379867; doi:10.1155/2019/4108474)
Supplement: Supplementary Materials — Figure S1: representative bioanalyzer profiles of cfDNA and MeDIP-seq libraries. Figure S2: MeDIP-seq analysis in lung cancer patients and controls. Table S1: real-time quantitative PCR primer sequences for validating MeDIP-seq enrichment efficiency. Table S2: DMRs identified in cfDNA of lung cancer patient plasma. Table S3: DMRs at promoter regions in cfDNA of lung cancer patient plasma. Table S4: GO annotation terms for the promoter-hypermethylated genes. [file 4108474.f1.zip › Supplementary Table S2 DMRs identified in cfDNA of lung cancer patient plasma..xlsx]

## Sheet: Global genome-wide DMRs
Supplementary Table S2: DMRs identified in cfDNA of lung cancer patient plasma.
Name	Coordinate	Annotation	Nearest PromoterID	Entrez ID	Nearest Refseq	Nearest Ensembl	Gene Name	Gene Description	Gene Type
hyper1	chrX:72090002-72100000	intron (NM_001080851, intron 2 of 5)	NM_033053	63947	NM_033053	ENSG00000269502	DMRTC1	DMRT like family C1	protein-coding
hyper10	chrY:13620002-13630000	Intergenic	NR_033667	352887	NR_033667	ENSG00000206159	GYG2P1	glycogenin 2 pseudogene 1	pseudo
hyper100	chr2:51330002-51340000	intron (NR_135237, intron 2 of 10)	NR_135237	730100	NR_135237	ENSG00000231918	LOC730100	uncharacterized LOC730100	ncRNA
hyper101	chrX:138620002-138630000	intron (NM_000133, intron 4 of 7)	NM_000133	2158	NM_000133	ENSG00000101981	F9	coagulation factor IX	protein-coding
hyper102	chr4:65800002-65810000	non-coding (NR_033976, exon 4 of 7)	NR_033976	401134	NR_033976	ENSG00000250125	LOC401134	uncharacterized LOC401134	ncRNA
hyper103	chr4:67730002-67740000	Intergenic	NR_110747	101927237	NR_110747	ENSG00000250075	LOC101927237	uncharacterized LOC101927237	ncRNA
hyper104	chr17:60800002-60810000	intron (NM_001288780, intron 7 of 10)	NM_001100875	162333	NM_152598	ENSG00000173838	2018-03-10	membrane associated ring-CH-type finger 10	protein-coding
hyper105	chr16:76100002-76110000	Intergenic	NR_136216	85445	NM_033401	ENSG00000152910	CNTNAP4	contactin associated protein like 4	protein-coding
hyper106	chr1:74510002-74520000	intron (NM_001105659, intron 6 of 7)	NM_001322315	127255	NM_145258	ENSG00000162620	LRRIQ3	leucine rich repeats and IQ motif containing 3	protein-coding
hyper107	chr13:95870002-95880000	intron (NM_001301830, intron 3 of 19)	NM_001301829	10257	NM_005845	ENSG00000125257	ABCC4	ATP binding cassette subfamily C member 4	protein-coding
hyper108	chr18:26490002-26500000	Intergenic	NM_001792	1000	NM_001792	ENSG00000170558	CDH2	cadherin 2	protein-coding
hyper109	chrX:92850002-92860000	Intergenic	NM_004538	4675	NM_004538	ENSG00000186310	NAP1L3	nucleosome assembly protein 1 like 3	protein-coding
hyper11	chrY:15710002-15720000	Intergenic	NM_004202	9087	NM_004202	ENSG00000154620	TMSB4Y	thymosin beta 4, Y-linked	protein-coding
hyper110	chr5:164080002-164090000	Intergenic	NR_105065	102546299	NR_105065	ENSG00000241956	LOC102546299	uncharacterized LOC102546299	ncRNA
hyper111	chr5:97860002-97870000	Intergenic	NM_001012761	285704	NM_173670	ENSG00000174136	RGMB	repulsive guidance molecule family member b	protein-coding
hyper112	chr4:64770002-64780000	Intergenic	NM_001010874	253017	NM_001010874	ENSG00000205678	TECRL	trans-2,3-enoyl-CoA reductase-like	protein-coding
hyper113	chr4:78060002-78070000	Intergenic	NM_004354	901	NM_004354	ENSG00000138764	CCNG2	cyclin G2	protein-coding
hyper114	chr3:16860002-16870000	Intergenic	NM_001144382	23228	NM_015184	ENSG00000154822	PLCL2	phospholipase C like 2	protein-coding
hyper115	chr6:114600002-114610000	intron (NR_125845, intron 9 of 9)	NM_153612	222537	NM_153612	ENSG00000249853	HS3ST5	heparan sulfate-glucosamine 3-sulfotransferase 5	protein-coding
hyper116	chr1:116390002-116400000	Intergenic	NM_005599	4808	NM_005599	ENSG00000177551	NHLH2	nescient helix-loop-helix 2	protein-coding
hyper117	chr11:24600002-24610000	intron (NM_001252008, intron 1 of 11)	NM_001252010	338645	NM_001009909	ENSG00000187398	LUZP2	leucine zipper protein 2	protein-coding
hyper118	chr11:23080002-23090000	Intergenic	NM_001195637	100500938	NM_001195637	ENSG00000255359	CCDC179	coiled-coil domain containing 179	protein-coding
hyper119	chr7:54120002-54130000	Intergenic	NR_004422	3262	NR_004422		HPVC1	human papillomavirus (type 18) E5 central sequence-like 1	ncRNA
hyper12	chrY:15050002-15060000	Intergenic	NR_136722	8653	NM_004660	ENSG00000067048	DDX3Y	DEAD-box helicase 3, Y-linked	protein-coding
hyper120	chr3:189870002-189880000	Intergenic	NM_001134418	55214	NM_018192	ENSG00000090530	P3H2	prolyl 3-hydroxylase 2	protein-coding
hyper121	chr12:72870002-72880000	intron (NM_013381, intron 5 of 18)	NR_026836	283392	NM_001025457	ENSG00000236333	TRHDE-AS1	TRHDE antisense RNA 1	ncRNA
hyper122	chr3:146320002-146330000	promoter-TSS (NM_001321245)	NM_001085420	389158	NM_001085420	ENSG00000231213	PLSCR5	phospholipid scramblase family member 5	protein-coding
hyper123	chr8:23950002-23960000	Intergenic	NR_130710	10863	NM_014265	ENSG00000042980	ADAM28	ADAM metallopeptidase domain 28	protein-coding
hyper124	chr16:66440002-66450000	TTS (NR_046242)	NR_046242	100505865	NR_046242		LINC00920	long intergenic non-protein coding RNA 920	ncRNA
hyper125	chr13:55230002-55240000	Intergenic	NR_031628	100302187	NR_031628	ENSG00000283126	MIR1297	microRNA 1297	ncRNA
hyper126	chr7:85630002-85640000	Intergenic	NR_134240	105375380	NR_134240	ENSG00000225128	LINC00972	long intergenic non-protein coding RNA 972	ncRNA
hyper127	chr14:86960002-86970000	Intergenic	NR_038445	283585	NR_038445	ENSG00000258804	LINC01148	long intergenic non-protein coding RNA 1148	ncRNA
hyper128	chr6:147780002-147790000	Intergenic	NM_001030060	389432	NM_001030060	ENSG00000203727	SAMD5	sterile alpha motif domain containing 5	protein-coding
hyper129	chr21:14590002-14600000	Intergenic	NR_036164	100423018	NR_036164	ENSG00000266211	MIR3156-3	microRNA 3156-3	ncRNA
hyper13	chrY:23300002-23310000	Intergenic	NM_001282471	100533178	NM_001282471	ENSG00000183146	PRORY	proline rich, Y-linked	protein-coding
hyper130	chr4:153370002-153380000	intron (NM_001257069, intron 2 of 3)	NR_036092	100422896	NR_036092	ENSG00000264678	MIR3140	microRNA 3140	ncRNA
hyper131	chr10:126360002-126370000	intron (NM_014661, intron 4 of 4)	NR_120630	101927944	NR_120630		FAM53B-AS1	FAM53B antisense RNA 1	ncRNA
hyper132	chr2:175270002-175280000	intron (NM_001193528, intron 5 of 7)	NM_024583	79634	NM_024583	ENSG00000144306	SCRN3	secernin 3	protein-coding
hyper133	chr14:87690002-87700000	Intergenic	NR_038445	283585	NR_038445	ENSG00000258804	LINC01148	long intergenic non-protein coding RNA 1148	ncRNA
hyper134	chr9:96330002-96340000	Intergenic	NM_005392	5253	NM_005392	ENSG00000197724	PHF2	PHD finger protein 2	protein-coding
hyper135	chr1:186990002-187000000	Intergenic	NR_126347	104169671	NR_126347		LINC01036	long intergenic non-protein coding RNA 1036	ncRNA
hyper136	chr11:133640002-133650000	Intergenic	NR_120444	646522	NR_120444	ENSG00000255258	LOC646522	uncharacterized LOC646522	ncRNA
hyper137	chr3:29960002-29970000	intron (NM_001003793, intron 10 of 14)	NR_046556	100873977	NR_046556	ENSG00000235593	RBMS3-AS1	RBMS3 antisense RNA 1	ncRNA
hyper138	chr13:62310002-62320000	Intergenic	NR_046995	100874143	NR_046995	ENSG00000229578	LINC00358	long intergenic non-protein coding RNA 358	ncRNA
hyper139	chr3:19350002-19360000	intron (NM_144633, intron 3 of 15)	NR_039954	100616291	NR_039954	ENSG00000271898	MIR4791	microRNA 4791	ncRNA
hyper14	chr1:72790002-72800000	Intergenic	NM_173808	257194	NM_173808	ENSG00000172260	NEGR1	neuronal growth regulator 1	protein-coding
hyper140	chr2:49680002-49690000	Intergenic	NM_181446	2492	NM_000145	ENSG00000170820	FSHR	follicle stimulating hormone receptor	protein-coding
hyper141	chr4:173780002-173790000	intron (NM_001034845, intron 7 of 12)	NR_125894	101928314	NR_125894		LOC101928314	uncharacterized LOC101928314	ncRNA
hyper142	chr13:65910002-65920000	Intergenic	NR_132362	105370242	NR_132362		LINC01052	long intergenic non-protein coding RNA 1052	ncRNA
hyper143	chr13:96200002-96210000	promoter-TSS (NM_006984)	NM_006984	9071	NM_006984	ENSG00000134873	CLDN10	claudin 10	protein-coding
hyper144	chr9:125180002-125190000	Intergenic	NM_001271165	5742	NM_000962	ENSG00000095303	PTGS1	prostaglandin-endoperoxide synthase 1	protein-coding
hyper145	chrX:29510002-29520000	intron (NM_014271, intron 5 of 10)	NR_049877	100847047	NR_049877	ENSG00000264090	MIR4666B	microRNA 4666b	ncRNA
hyper146	chr10:54580002-54590000	Intergenic	NM_000242	4153	NM_000242	ENSG00000165471	MBL2	mannose binding lectin 2	protein-coding
hyper147	chr14:28860002-28870000	Intergenic	NR_125758	103695363	NR_125758		FOXG1-AS1	FOXG1 antisense RNA 1 (head to head)	ncRNA
hyper148	chr13:62910002-62920000	Intergenic	NR_125787	103752583	NR_125787		LINC01075	long intergenic non-protein coding RNA 1075	ncRNA
hyper149	chr8:60520002-60530000	Intergenic	NM_014729	9760	NM_014729	ENSG00000198846	TOX	thymocyte selection associated high mobility group box	protein-coding
hyper15	chr22:16480002-16490000	Intergenic	NM_001005239	81061	NM_001005239	ENSG00000130538	OR11H1	olfactory receptor family 11 subfamily H member 1	protein-coding
hyper150	chr12:72290002-72300000	intron (NM_022771, intron 11 of 17)	NM_173353	121278	NM_173353	ENSG00000139287	TPH2	tryptophan hydroxylase 2	protein-coding
hyper151	chr1:194020002-194030000	Intergenic	NR_125789	101929184	NR_125789	ENSG00000232077	LINC01031	long intergenic non-protein coding RNA 1031	ncRNA
hyper152	chr8:55920002-55930000	Intergenic	NM_052898	114786	NM_052898	ENSG00000206579	XKR4	XK related 4	protein-coding
hyper153	chr11:39960002-39970000	Intergenic	NR_047674	57689	NM_020929	ENSG00000148948	LRRC4C	leucine rich repeat containing 4C	protein-coding
hyper154	chr3:57760002-57770000	intron (NM_001304420, intron 1 of 21)	NM_007159	7871	NM_007159	ENSG00000163681	SLMAP	sarcolemma associated protein	protein-coding
hyper155	chr4:20330002-20340000	intron (NM_001289136, intron 4 of 35)	NR_037876	100505893	NR_037876	ENSG00000248228	SLIT2-IT1	SLIT2 intronic transcript 1	ncRNA
hyper156	chr8:114330002-114340000	intron (NM_052900, intron 1 of 68)	NM_198124	114788	NM_052900	ENSG00000164796	CSMD3	CUB and Sushi multiple domains 3	protein-coding
hyper157	chr4:31440002-31450000	Intergenic	NR_125935	102723778	NR_125935	ENSG00000251182	LOC102723778	uncharacterized LOC102723778	ncRNA
hyper158	chr6:63280002-63290000	Intergenic	NM_152688	202559	NM_152688	ENSG00000112232	KHDRBS2	KH RNA binding domain containing, signal transduction associated 2	protein-coding
hyper159	chr14:24250002-24260000	Intergenic	NM_005794	10202	NM_005794	ENSG00000100867	DHRS2	dehydrogenase/reductase 2	protein-coding
hyper16	chr2:52770002-52780000	Intergenic	NR_039630	100616431	NR_039630	ENSG00000264975	MIR4431	microRNA 4431	ncRNA
hyper160	chr1:73400002-73410000	Intergenic	NR_110676	101927295	NR_110676	ENSG00000233973	LINC01360	long intergenic non-protein coding RNA 1360	ncRNA
hyper161	chr1:67310002-67320000	intron (NM_207014, intron 7 of 9)	NM_005478	10022	NM_005478	ENSG00000172410	INSL5	insulin like 5	protein-coding
hyper162	chr3:36030002-36040000	Intergenic	NR_029824	406916	NR_029824	ENSG00000207625	MIR128-2	microRNA 128-2	ncRNA
hyper163	chr5:52610002-52620000	Intergenic	NM_013409	10468	NM_006350	ENSG00000134363	FST	follistatin	protein-coding
hyper164	chr8:35270002-35280000	intron (NM_080872, intron 1 of 16)	NM_001322818	137970	NM_080872	ENSG00000156687	UNC5D	unc-5 netrin receptor D	protein-coding
hyper165	chr4:64230002-64240000	Intergenic	NM_001010874	253017	NM_001010874	ENSG00000205678	TECRL	trans-2,3-enoyl-CoA reductase-like	protein-coding
hyper166	chr1:224780002-224790000	intron (NR_136294, intron 4 of 8)	NM_152495	149111	NM_152495	ENSG00000143786	CNIH3	cornichon family AMPA receptor auxiliary protein 3	protein-coding
hyper167	chr9:139590002-139600000	Intergenic	NM_152421	138311	NM_152421	ENSG00000165716	FAM69B	family with sequence similarity 69 member B	protein-coding
hyper168	chr1:64610002-64620000	intron (NM_005012, intron 7 of 8)	NR_110665	101927034	NR_110665	ENSG00000223949	ROR1-AS1	ROR1 antisense RNA 1	ncRNA
hyper169	chr2:4790002-4800000	Intergenic	NR_034134	727982	NR_034134	ENSG00000231532	LINC01249	long intergenic non-protein coding RNA 1249	ncRNA
hyper17	chrY:7000002-7010000	Intergenic	NR_028062	5616	NM_002760	ENSG00000099725	PRKY	protein kinase, Y-linked, pseudogene	pseudo
hyper170	chr1:188740002-188750000	Intergenic	NR_132374	106144535	NR_132374	ENSG00000231599	LINC01037	long intergenic non-protein coding RNA 1037	ncRNA
hyper171	chr11:49650002-49660000	intron (NR_027044, intron 2 of 6)	NR_027044	440040	NR_027044	ENSG00000205035	LOC440040	glutamate metabotropic receptor 5 pseudogene	pseudo
hyper172	chr12:59980002-59990000	Intergenic	NM_001270622	9194	NM_004731	ENSG00000118596	SLC16A7	solute carrier family 16 member 7	protein-coding
hyper173	chr17:52790002-52800000	Intergenic	NM_001321173	10040	NM_005486	ENSG00000141198	TOM1L1	target of myb1 like 1 membrane trafficking protein	protein-coding
hyper174	chr5:130660002-130670000	intron (NM_020240, intron 2 of 5)	NM_020240	56990	NM_020240	ENSG00000158985	CDC42SE2	CDC42 small effector 2	protein-coding
hyper175	chr1:222600002-222610000	Intergenic	NM_024746	79802	NM_024746	ENSG00000143512	HHIPL2	HHIP like 2	protein-coding
hyper176	chr1:32100002-32110000	intron (NM_012392, intron 1 of 4)	NR_033688	553115	NM_012392	ENSG00000162517	PEF1	penta-EF-hand domain containing 1	protein-coding
hyper177	chrX:131120002-131130000	Intergenic	NM_001042453	51765	NM_016542	ENSG00000134602	STK26	serine/threonine kinase 26	protein-coding
hyper178	chr5:135300002-135310000	Intergenic	NM_002302	3950	NM_002302	ENSG00000145826	LECT2	leukocyte cell derived chemotaxin 2	protein-coding
hyper179	chr14:71530002-71540000	intron (NM_014982, intron 26 of 35)	NM_014982	22990	NM_014982	ENSG00000100731	PCNX1	pecanex homolog 1 (Drosophila)	protein-coding
hyper18	chrY:24470002-24480000	intron (NM_152585, intron 1 of 11).2	NR_104151	100652931	NR_104151		LOC100652931	RNA binding motif protein, Y-linked, family 1, member A1 pseudogene	pseudo
hyper180	chr5:140440002-140450000	intron (NR_105056, intron 1 of 3)	NR_105056	101926905	NR_105056		LOC101926905	uncharacterized LOC101926905	ncRNA
hyper181	chr4:11120002-11130000	Intergenic	NR_030298	693157	NR_030298	ENSG00000207716	MIR572	microRNA 572	ncRNA
hyper182	chr5:150170002-150180000	5' UTR (NM_032947, exon 2 of 2)	NM_032947	85027	NM_032947	ENSG00000256235	SMIM3	small integral membrane protein 3	protein-coding
hyper183	chr7:63370002-63380000	Intergenic	NR_039987	100506050	NR_039987		LINC01005	long intergenic non-protein coding RNA 1005	ncRNA
hyper184	chr18:54770002-54780000	Intergenic	NR_048536	100885779	NR_048536	ENSG00000258609	LINC-ROR	long intergenic non-protein coding RNA, regulator of reprogramming	ncRNA
hyper185	chr5:68040002-68050000	Intergenic	NR_130778	101928885	NR_130778		LOC101928885	uncharacterized LOC101928885	ncRNA
hyper186	chr8:136080002-136090000	Intergenic	NR_120396	286094	NR_026706	ENSG00000254083	LINC01591	long intergenic non-protein coding RNA 1591	ncRNA
hyper187	chr17:76730002-76740000	intron (NM_004762, intron 1 of 12)	NM_001292018	9267	NM_004762	ENSG00000108669	CYTH1	cytohesin 1	protein-coding
hyper188	chr14:63220002-63230000	intron (NM_172375, intron 9 of 9)	NM_139318	27133	NM_139318	ENSG00000140015	KCNH5	potassium voltage-gated channel subfamily H member 5	protein-coding
hyper189	chr1:183570002-183580000	Intergenic	NM_001127651	4688	NM_000433	ENSG00000116701	NCF2	neutrophil cytosolic factor 2	protein-coding
hyper19	chr3:89940002-89950000	Intergenic	NM_005233	2042	NM_005233	ENSG00000044524	EPHA3	EPH receptor A3	protein-coding
hyper190	chr21:18720002-18730000	Intergenic	NR_037586	100505929	NM_001005521	ENSG00000232560	LINC01549	long intergenic non-protein coding RNA 1549	ncRNA
hyper191	chr2:185590002-185600000	intron (NM_194250, intron 1 of 3)	NM_194250	91752	NM_194250	ENSG00000170396	ZNF804A	zinc finger protein 804A	protein-coding
hyper192	chr11:95270002-95280000	Intergenic	NM_144664	143684	NM_144664	ENSG00000077458	FAM76B	family with sequence similarity 76 member B	protein-coding
hyper193	chr11:91320002-91330000	Intergenic	NR_031663	100302228	NR_031663	ENSG00000221586	MIR1261	microRNA 1261	ncRNA
hyper194	chr15:86030002-86040000	intron (NM_007200, intron 2 of 36)	NM_007200	11214	NM_006738	ENSG00000170776	AKAP13	A-kinase anchoring protein 13	protein-coding
hyper195	chr2:73690002-73700000	intron (NM_015120, intron 9 of 22)	NR_046762	100874291	NR_046762	ENSG00000230002	ALMS1-IT1	ALMS1 intronic transcript 1	ncRNA
hyper196	chr5:44870002-44880000	Intergenic	NM_016640	10884	NM_016640	ENSG00000112996	MRPS30	mitochondrial ribosomal protein S30	protein-coding
hyper197	chr3:192860002-192870000	Intergenic	NM_020386	57110	NM_020386	ENSG00000127252	HRASLS	HRAS like suppressor	protein-coding
hyper198	chr4:162830002-162840000	intron (NM_020116, intron 4 of 15)	NR_125888	101928052	NR_125888	ENSG00000249419	LOC101928052	uncharacterized LOC101928052	ncRNA
hyper199	chr2:146890002-146900000	Intergenic	NR_026904	728773	NR_026904		PABPC1P2	poly(A) binding protein cytoplasmic 1 pseudogene 2	pseudo
hyper2	chrX:147770002-147780000	intron (NM_001169125, intron 3 of 19)	NM_001170628	2334	NM_002025	ENSG00000155966	AFF2	AF4/FMR2 family member 2	protein-coding
hyper20	chr14:87070002-87080000	Intergenic	NR_038445	283585	NR_038445	ENSG00000258804	LINC01148	long intergenic non-protein coding RNA 1148	ncRNA
hyper200	chr8:63760002-63770000	intron (NR_130764, intron 4 of 6)	NR_027378	643763	NM_001039769	ENSG00000274956	UG0898H09	uncharacterized LOC643763	ncRNA
hyper201	chr13:99560002-99570000	intron (NM_001130049, intron 9 of 32)	NM_001130048	23348	NM_015296	ENSG00000088387	DOCK9	dedicator of cytokinesis 9	protein-coding
hyper202	chr11:85100002-85110000	intron (NM_001142699, intron 3 of 27)	NM_001142699	1740	NM_001364	ENSG00000150672	DLG2	discs large MAGUK scaffold protein 2	protein-coding
hyper203	chr8:51550002-51560000	intron (NM_001321778, intron 13 of 16)	NM_001321778	54212	NM_018967	ENSG00000147481	SNTG1	syntrophin gamma 1	protein-coding
hyper204	chr3:167390002-167400000	Intergenic	NM_178824	151790	NM_178824	ENSG00000174776	WDR49	WD repeat domain 49	protein-coding
hyper205	chr12:65240002-65250000	intron (NM_001330188, intron 10 of 13)	NM_015279	23329	NM_015279	ENSG00000111490	TBC1D30	TBC1 domain family member 30	protein-coding
hyper206	chr2:151460002-151470000	Intergenic	NR_110244	101929282	NR_110244	ENSG00000224048	LOC101929282	uncharacterized LOC101929282	ncRNA
hyper207	chr3:28210002-28220000	Intergenic	NM_001331186	152100	NM_182523	ENSG00000187118	CMC1	C-X9-C motif containing 1	protein-coding
hyper208	chr1:236090002-236100000	Intergenic	NR_102436	1130	NM_000081	ENSG00000143669	LYST	lysosomal trafficking regulator	protein-coding
hyper209	chr8:83690002-83700000	Intergenic	NR_134295	101927141	NR_134295	ENSG00000254394	LOC101927141	uncharacterized LOC101927141	ncRNA
hyper21	chrY:8530002-8540000	Intergenic	NR_001550	252950	NR_001550	ENSG00000233699	TTTY18	testis-specific transcript, Y-linked 18 (non-protein coding)	ncRNA
hyper210	chr11:50420002-50430000	Intergenic	NR_024504	646813	NR_024504		LOC646813	DEAH-box helicase 9 pseudogene	pseudo
hyper211	chr2:169810002-169820000	intron (NM_003742, intron 18 of 27)	NM_001081686	57818	NM_021176	ENSG00000152254	G6PC2	glucose-6-phosphatase catalytic subunit 2	protein-coding
hyper212	chr12:73640002-73650000	Intergenic	NR_110130	101928137	NR_110130	ENSG00000258123	LOC101928137	uncharacterized LOC101928137	ncRNA
hyper213	chr2:215820002-215830000	intron (NM_015657, intron 31 of 44)	NM_015657	26154	NM_015657	ENSG00000144452	ABCA12	ATP binding cassette subfamily A member 12	protein-coding
hyper214	chr10:74570002-74580000	intron (NR_073062, intron 3 of 9)	NR_130125	170392	NM_152635	ENSG00000138315	OIT3	oncoprotein induced transcript 3	protein-coding
hyper215	chr10:24680002-24690000	intron (NM_001098500, intron 4 of 18)	NM_001321681	56243	NM_019590	ENSG00000120549	KIAA1217	KIAA1217	protein-coding
hyper216	chr18:26710002-26720000	Intergenic	NM_001792	1000	NM_001792	ENSG00000170558	CDH2	cadherin 2	protein-coding
hyper217	chr3:107390002-107400000	intron (NM_001276286, intron 3 of 16)	NM_001142568	56987	NM_020235	ENSG00000114439	BBX	BBX, HMG-box containing	protein-coding
hyper218	chr16:77730002-77740000	Intergenic	NM_001243657	283927	NM_001105663	ENSG00000140876	NUDT7	nudix hydrolase 7	protein-coding
hyper219	chr6:92450002-92460000	Intergenic	NR_104154	101929083	NR_104154		CASC6	cancer susceptibility candidate 6 (non-protein coding)	ncRNA
hyper22	chr6:63600002-63610000	Intergenic	NM_016571	51557	NM_016571	ENSG00000146166	LGSN	lengsin, lens protein with glutamine synthetase domain	protein-coding
hyper220	chr2:186480002-186490000	Intergenic	NR_110215	101927196	NR_110214	ENSG00000226747	LOC101927196	uncharacterized LOC101927196	ncRNA
hyper221	chr13:23480002-23490000	intron (NR_138043, intron 1 of 2)	NR_138043	100996930	NR_138043		LINC00621	long intergenic non-protein coding RNA 621	ncRNA
hyper222	chr8:109630002-109640000	intron (NR_136411, intron 2 of 3)	NR_136411	157753	NM_153015	ENSG00000164841	TMEM74	transmembrane protein 74	protein-coding
hyper223	chr8:78010002-78020000	Intergenic	NM_001172087	5828	NM_000318	ENSG00000164751	PEX2	peroxisomal biogenesis factor 2	protein-coding
hyper224	chr1:171230002-171240000	intron (NM_001282694, intron 2 of 7)	NM_001282692	2326	NM_002021	ENSG00000010932	FMO1	flavin containing monooxygenase 1	protein-coding
hyper225	chr4:90250002-90260000	Intergenic	NM_198281	285513	NM_198281	ENSG00000185477	GPRIN3	GPRIN family member 3	protein-coding
hyper226	chr10:92080002-92090000	Intergenic	NR_110657	101926942	NR_110657	ENSG00000236373	LOC101926942	uncharacterized LOC101926942	ncRNA
hyper227	chr8:59790002-59800000	intron (NM_014729, intron 3 of 8)	NM_003580	8439	NM_003580	ENSG00000035681	NSMAF	neutral sphingomyelinase activation associated factor	protein-coding
hyper228	chr10:33110002-33120000	intron (NM_001321115, intron 33 of 43)	NR_132768	106633814	NR_132768		SNORA86	small nucleolar RNA, H/ACA box 86	snoRNA
hyper229	chr2:224330002-224340000	Intergenic	NM_003469	7857	NM_003469	ENSG00000171951	SCG2	secretogranin II	protein-coding
hyper23	chr7:57960002-57970000	Intergenic	NM_001159279	441234	NM_001159279	ENSG00000182111	ZNF716	zinc finger protein 716	protein-coding
hyper230	chr3:11870002-11880000	intron (NR_135610, intron 4 of 10)	NR_135610	132001	NM_138807	ENSG00000144559	TAMM41	TAM41 mitochondrial translocator assembly and maintenance homolog	protein-coding
hyper231	chr8:47380002-47390000	Intergenic	NR_027012	497634	NR_027012	ENSG00000253314	LINC00293	long intergenic non-protein coding RNA 293	ncRNA
hyper232	chr18:70950002-70960000	Intergenic	NR_034133	400655	NR_034133	ENSG00000263711	LOC400655	uncharacterized LOC400655	ncRNA
hyper233	chr5:155880002-155890000	intron (NM_001128209, intron 2 of 7)	NM_001128209	6444	NM_000337	ENSG00000170624	SGCD	sarcoglycan delta	protein-coding
hyper234	chr14:84440002-84450000	Intergenic	NR_135155	105370605	NR_135155	ENSG00000258814	LOC105370605	uncharacterized LOC105370605	ncRNA
hyper235	chr15:47550002-47560000	intron (NM_001198999, intron 1 of 19)	NM_001198999	80031	NM_020858	ENSG00000137872	SEMA6D	semaphorin 6D	protein-coding
hyper236	chr8:124120002-124130000	intron (NM_001330606, intron 9 of 20)	NM_145647	93594	NM_145647	ENSG00000156787	TBC1D31	TBC1 domain family member 31	protein-coding
hyper237	chr19:40600002-40610000	Intergenic	NM_001142578	284323	NM_001010880	ENSG00000197782	ZNF780A	zinc finger protein 780A	protein-coding
hyper238	chr7:109570002-109580000	Intergenic	NR_003024	442720	NR_003024	ENSG00000237064	EIF3IP1	eukaryotic translation initiation factor 3 subunit I pseudogene 1	pseudo
hyper239	chr5:20960002-20970000	Intergenic	NM_001291956	1016	NM_004934	ENSG00000145526	CDH18	cadherin 18	protein-coding
hyper24	chr12:83810002-83820000	Intergenic	NM_001320321	160335	NM_152588	ENSG00000179104	TMTC2	transmembrane and tetratricopeptide repeat containing 2	protein-coding
hyper240	chr12:90390002-90400000	Intergenic	NR_135019	105369891	NR_135019	ENSG00000257725	LOC105369891	uncharacterized LOC105369891	ncRNA
hyper241	chr12:71380002-71390000	Intergenic	NM_002849	5801	NM_002849	ENSG00000153233	PTPRR	protein tyrosine phosphatase, receptor type R	protein-coding
hyper242	chr3:162160002-162170000	Intergenic	NR_033945	647107	NR_033945	ENSG00000241369	LINC01192	long intergenic non-protein coding RNA 1192	ncRNA
hyper243	chr11:48220002-48230000	Intergenic	NM_001005470	119765	NM_001005470	ENSG00000175619	OR4B1	olfactory receptor family 4 subfamily B member 1	protein-coding
hyper244	chr14:71890002-71900000	Intergenic	NR_001276	319139	NR_001276	ENSG00000207444	SNORD56B	small nucleolar RNA, C/D box 56B	snoRNA
hyper245	chr13:38150002-38160000	intron (NM_001330517, intron 10 of 21)	NM_001286665	10631	NM_006475	ENSG00000133110	POSTN	periostin	protein-coding
hyper246	chr10:47550002-47560000	Intergenic	NR_103828	100996567	NR_103827		ANTXRLP1	anthrax toxin receptor-like pseudogene 1	pseudo
hyper247	chr2:157710002-157720000	Intergenic	NM_001329868	11227	NM_014568	ENSG00000136542	GALNT5	polypeptide N-acetylgalactosaminyltransferase 5	protein-coding
hyper248	chr3:83520002-83530000	Intergenic	NR_033860	440970	NR_033860	ENSG00000242641	LINC00971	long intergenic non-protein coding RNA 971	ncRNA
hyper249	chr6:123250002-123260000	Intergenic	NM_001010852	134829	NM_001010852	ENSG00000146352	CLVS2	clavesin 2	protein-coding
hyper25	chr11:104850002-104860000	Intergenic	NM_001225	837	NM_001225	ENSG00000196954	CASP4	caspase 4	protein-coding
hyper250	chr1:60900002-60910000	Intergenic	NM_152377	127795	NM_152377	ENSG00000162598	C1orf87	chromosome 1 open reading frame 87	protein-coding
hyper251	chr4:19850002-19860000	Intergenic	NM_001289136	9353	NM_004787	ENSG00000145147	SLIT2	slit guidance ligand 2	protein-coding
hyper252	chr11:35910002-35920000	Intergenic	NM_174902	143458	NM_174902	ENSG00000179241	LDLRAD3	low density lipoprotein receptor class A domain containing 3	protein-coding
hyper253	chr11:11620002-11630000	intron (NM_198516, intron 1 of 10)	NM_198516	374378	NM_198516	ENSG00000110328	GALNT18	polypeptide N-acetylgalactosaminyltransferase 18	protein-coding
hyper254	chr4:176310002-176320000	Intergenic	NM_001261448	2823	NM_005277	ENSG00000150625	GPM6A	glycoprotein M6A	protein-coding
hyper255	chr13:107840002-107850000	intron (NM_001080396, intron 2 of 2)	NR_031671	100302286	NR_031671	ENSG00000221650	MIR1267	microRNA 1267	ncRNA
hyper256	chr1:71440002-71450000	intron (NM_001126044, intron 2 of 4)	NR_038420	100132618	NR_038420		ZRANB2-AS1	ZRANB2 antisense RNA 1	ncRNA
hyper257	chr9:80670002-80680000	Intergenic	NM_002072	2776	NM_002072	ENSG00000156052	GNAQ	G protein subunit alpha q	protein-coding
hyper258	chr4:31530002-31540000	Intergenic	NR_125935	102723778	NR_125935	ENSG00000251182	LOC102723778	uncharacterized LOC102723778	ncRNA
hyper259	chr1:58470002-58480000	intron (NM_021080, intron 1 of 16)	NR_104362	101926890	NR_104362	ENSG00000226759	DAB1-AS1	DAB1 antisense RNA 1	ncRNA
hyper26	chr20:7430002-7440000	Intergenic	NR_107029	102465865	NR_107029	ENSG00000278159	MIR8062	microRNA 8062	ncRNA
hyper260	chr3:161200002-161210000	Intergenic	NM_001080440	131149	NM_001080440	ENSG00000182447	OTOL1	otolin 1	protein-coding
hyper261	chr12:88960002-88970000	intron (NM_003994, intron 1 of 8)	NM_003994	4254	NM_000899	ENSG00000049130	KITLG	KIT ligand	protein-coding
hyper262	chr9:77040002-77050000	Intergenic	NR_121182	101927358	NR_121182	ENSG00000227809	LOC101927358	uncharacterized LOC101927358	ncRNA
hyper263	chr2:230760002-230770000	intron (NM_001284214, intron 1 of 41)	NM_001284215	9320	NM_004238	ENSG00000153827	TRIP12	thyroid hormone receptor interactor 12	protein-coding
hyper264	chr4:46290002-46300000	intron (NM_001330690, intron 8 of 10)	NM_001114175	2555	NM_000807	ENSG00000151834	GABRA2	gamma-aminobutyric acid type A receptor alpha2 subunit	protein-coding
hyper265	chr11:110500002-110510000	intron (NM_001258415, intron 2 of 14)	NM_001258415	57569	NM_020809	ENSG00000137727	ARHGAP20	Rho GTPase activating protein 20	protein-coding
hyper266	chr2:224320002-224330000	Intergenic	NM_003469	7857	NM_003469	ENSG00000171951	SCG2	secretogranin II	protein-coding
hyper267	chr7:84240002-84250000	Intergenic	NR_110080	101927378	NR_110079	ENSG00000235139	LOC101927378	uncharacterized LOC101927378	ncRNA
hyper268	chr9:120470002-120480000	exon (NM_003266, exon 4 of 4)	NM_138554	7099	NM_003266	ENSG00000136869	TLR4	toll like receptor 4	protein-coding
hyper269	chr3:150640002-150650000	non-coding (NR_046380, exon 5 of 5)	NM_052995	7401	NM_052995	ENSG00000163646	CLRN1	clarin 1	protein-coding
hyper27	chr7:63110002-63120000	Intergenic	NR_036246	100422917	NR_036246	ENSG00000264426	MIR4283-1	microRNA 4283-1	ncRNA
hyper270	chr2:132830002-132840000	Intergenic	NR_027019	554226	NR_027019	ENSG00000163046	ANKRD30BL	ankyrin repeat domain 30B like	pseudo
hyper271	chr1:107730002-107740000	intron (NM_001330665, intron 2 of 6)	NM_001113226	22854	NM_014917	ENSG00000162631	NTNG1	netrin G1	protein-coding
hyper272	chr10:131110002-131120000	Intergenic	NM_002412	4255	NM_002412	ENSG00000170430	MGMT	O-6-methylguanine-DNA methyltransferase	protein-coding
hyper273	chr6:24270002-24280000	intron (NM_016356, intron 7 of 9)	NM_181337	353219	NM_181337	ENSG00000146049	KAAG1	kidney associated antigen 1	protein-coding
hyper274	chr15:61840002-61850000	Intergenic	NM_134261	6095	NM_002943	ENSG00000069667	RORA	RAR related orphan receptor A	protein-coding
hyper275	chr18:41980002-41990000	intron (NR_110792, intron 2 of 4)	NR_110792	101927921	NR_110792	ENSG00000267337	LINC01478	long intergenic non-protein coding RNA 1478	ncRNA
hyper276	chr5:166080002-166090000	Intergenic	NR_108020	102557615	NR_108020	ENSG00000254130	LINC01947	long intergenic non-protein coding RNA 1947	ncRNA
hyper277	chr4:27780002-27790000	Intergenic	NR_125921	101929199	NR_125921	ENSG00000249699	LOC101929199	uncharacterized LOC101929199	ncRNA
hyper278	chr3:15400002-15410000	Intergenic	NM_001018009	9467	NM_004844	ENSG00000131370	SH3BP5	SH3 domain binding protein 5	protein-coding
hyper279	chr2:103070002-103080000	Intergenic	NM_001011552	389015	NM_001011552	ENSG00000180251	SLC9A4	solute carrier family 9 member A4	protein-coding
hyper28	chr12:29190002-29200000	Intergenic	NM_001271783	55711	NM_018099	ENSG00000064763	FAR2	fatty acyl-CoA reductase 2	protein-coding
hyper280	chr21:39190002-39200000	intron (NM_002240, intron 2 of 3)	NM_002240	3763	NM_002240	ENSG00000157542	KCNJ6	potassium voltage-gated channel subfamily J member 6	protein-coding
hyper281	chr7:79110002-79120000	Intergenic	NR_038344	100505881	NR_038343	ENSG00000234456	MAGI2-AS3	MAGI2 antisense RNA 3	ncRNA
hyper282	chr15:88230002-88240000	Intergenic	NR_026869	145978	NM_152454	ENSG00000259527	LINC00052	long intergenic non-protein coding RNA 52	ncRNA
hyper283	chr12:38690002-38700000	Intergenic	NM_001308340	144245	NM_001013620	ENSG00000175548	ALG10B	ALG10B, alpha-1,2-glucosyltransferase	protein-coding
hyper284	chr3:128950002-128960000	Intergenic	NM_016128	22820	NM_016128	ENSG00000181789	COPG1	coatomer protein complex subunit gamma 1	protein-coding
hyper285	chr17:61100002-61110000	intron (NM_025185, intron 1 of 24)	NM_025185	26115	NM_015623	ENSG00000170921	TANC2	tetratricopeptide repeat, ankyrin repeat and coiled-coil containing 2	protein-coding
hyper286	chr6:83350002-83360000	Intergenic	NM_001166392	7162	NM_006670	ENSG00000146242	TPBG	trophoblast glycoprotein	protein-coding
hyper287	chrX:71320002-71330000	intron (NM_001013627, intron 1 of 7)	NM_001024455	340526	NM_001024455	ENSG00000242732	RGAG4	retrotransposon gag domain containing 4	protein-coding
hyper288	chr3:23280002-23290000	intron (NM_152653, intron 3 of 5)	NM_152653	7325	NM_152653	ENSG00000182247	UBE2E2	ubiquitin conjugating enzyme E2 E2	protein-coding
hyper289	chr9:7640002-7650000	Intergenic	NM_033428	90871	NM_033428	ENSG00000137038	TMEM261	transmembrane protein 261	protein-coding
hyper29	chr1:102390002-102400000	intron (NM_058170, intron 1 of 5)	NR_033424	94236	NR_033424		DNAJA1P5	DnaJ heat shock protein family (Hsp40) member A1 pseudogene 5	pseudo
hyper290	chr14:73860002-73870000	intron (NM_001005743, intron 2 of 12)	NM_001005743	8650	NM_003744	ENSG00000133961	NUMB	NUMB, endocytic adaptor protein	protein-coding
hyper291	chr1:241560002-241570000	Intergenic	NM_001282773	6000	NM_002924	ENSG00000182901	RGS7	regulator of G-protein signaling 7	protein-coding
hyper292	chr6:13460002-13470000	intron (NM_018988, intron 1 of 1)	NR_038459	54438	NM_018988	ENSG00000145990	GFOD1	glucose-fructose oxidoreductase domain containing 1	protein-coding
hyper293	chr13:49190002-49200000	Intergenic	NM_001308476	57105	NM_020377	ENSG00000152207	CYSLTR2	cysteinyl leukotriene receptor 2	protein-coding
hyper294	chr10:83770002-83780000	intron (NM_001165973, intron 1 of 10)	NM_001165973	10718	NM_001010848	ENSG00000185737	NRG3	neuregulin 3	protein-coding
hyper295	chr1:142660002-142670000	Intergenic	NR_046228	100874392	NR_046228		ANKRD20A12P	ankyrin repeat domain 20 family member A12, pseudogene	pseudo
hyper296	chr15:25530002-25540000	Intergenic	NR_001295	338428	NR_001295	ENSG00000274640	SNORD109A	small nucleolar RNA, C/D box 109A	snoRNA
hyper297	chr12:88410002-88420000	intron (NM_152589, intron 3 of 12)	NM_152589	160419	NM_152589	ENSG00000165805	C12orf50	chromosome 12 open reading frame 50	protein-coding
hyper298	chr14:25110002-25120000	Intergenic	NM_001346011	3002	NM_004131	ENSG00000100453	GZMB	granzyme B	protein-coding
hyper299	chr12:130450002-130460000	Intergenic	NM_133448	121256	NM_133448	ENSG00000151952	TMEM132D	transmembrane protein 132D	protein-coding
hyper3	chr4:60850002-60860000	Intergenic	NR_039652	100616450	NR_039652	ENSG00000265829	MIR548AG1	microRNA 548ag-1	ncRNA
hyper30	chr2:123710002-123720000	Intergenic	NM_130773	129684	NM_130773	ENSG00000155052	CNTNAP5	contactin associated protein like 5	protein-coding
hyper300	chr11:106270002-106280000	Intergenic	NR_120551	101928535	NR_120551	ENSG00000254811	LOC101928535	uncharacterized LOC101928535	ncRNA
hyper301	chr3:155050002-155060000	Intergenic	NR_037902	100507537	NR_037902	ENSG00000240045	LOC100507537	uncharacterized LOC100507537	ncRNA
hyper302	chr3:84210002-84220000	Intergenic	NR_033860	440970	NR_033860	ENSG00000242641	LINC00971	long intergenic non-protein coding RNA 971	ncRNA
hyper303	chr3:132080002-132090000	intron (NM_001134194, intron 10 of 10)	NM_001099	55	NM_001099	ENSG00000014257	ACPP	acid phosphatase, prostate	protein-coding
hyper304	chr2:68620002-68630000	TTS (NM_002664)	NM_002664	5341	NM_002664	ENSG00000115956	PLEK	pleckstrin	protein-coding
hyper305	chr3:168230002-168240000	intron (NR_021485, intron 3 of 15)	NR_030294	693136	NR_030294	ENSG00000207717	MIR551B	microRNA 551b	ncRNA
hyper306	chr1:186960002-186970000	Intergenic	NR_126347	104169671	NR_126347		LINC01036	long intergenic non-protein coding RNA 1036	ncRNA
hyper307	chr7:89150002-89160000	Intergenic	NR_003551	442523	NR_003551	ENSG00000235436	DPY19L2P4	DPY19L2 pseudogene 4	pseudo
hyper308	chr3:94280002-94290000	Intergenic	NR_106788	102466722	NR_106788	ENSG00000276830	MIR6730	microRNA 6730	ncRNA
hyper309	chr5:66540002-66550000	Intergenic	NM_005582	4064	NM_005582	ENSG00000134061	CD180	CD180 molecule	protein-coding
hyper31	chrX:77420002-77430000	Intergenic	NM_015975	51616	NM_015975	ENSG00000187325	TAF9B	TATA-box binding protein associated factor 9b	protein-coding
hyper310	chr7:37320002-37330000	intron (NM_001206482, intron 4 of 21)	NM_001206482	9844	NM_014800	ENSG00000155849	ELMO1	engulfment and cell motility 1	protein-coding
hyper311	chr8:73740002-73750000	intron (NM_004770, intron 2 of 2)	NR_110656	101926908	NR_110656	ENSG00000253726	LOC101926908	uncharacterized LOC101926908	ncRNA
hyper312	chr3:118870002-118880000	Intergenic	NM_152539	152405	NM_152539	ENSG00000163424	C3orf30	chromosome 3 open reading frame 30	protein-coding
hyper313	chr15:58610002-58620000	Intergenic	NM_000236	3990	NM_000236	ENSG00000166035	LIPC	lipase C, hepatic type	protein-coding
hyper314	chr10:118830002-118840000	intron (NM_001258300, intron 1 of 17)	NM_001258300	57698	NM_018330	ENSG00000187164	SHTN1	shootin 1	protein-coding
hyper315	chr8:108890002-108900000	Intergenic	NM_001317942	340419	NM_178565	ENSG00000147655	RSPO2	R-spondin 2	protein-coding
hyper316	chr1:49340002-49350000	intron (NM_001323573, intron 5 of 12)	NM_024603	79656	NM_024603	ENSG00000162373	BEND5	BEN domain containing 5	protein-coding
hyper317	chr18:4140002-4150000	intron (NM_004746, intron 2 of 12)	NR_036489	284215	NR_036489	ENSG00000261520	DLGAP1-AS5	DLGAP1 antisense RNA 5	ncRNA
hyper318	chr1:26360002-26370000	3' UTR (NM_032513, exon 7 of 7)	NM_032513	7780	NM_032513	ENSG00000158014	SLC30A2	solute carrier family 30 member 2	protein-coding
hyper319	chr9:115140002-115150000	intron (NR_036651, intron 1 of 9)	NM_001195822	84263	NM_032303	ENSG00000119471	HSDL2	hydroxysteroid dehydrogenase like 2	protein-coding
hyper32	chr1:190300002-190310000	intron (NM_199051, intron 2 of 7)	NM_001317188	339479	NM_199051	ENSG00000162670	BRINP3	BMP/retinoic acid inducible neural specific 3	protein-coding
hyper320	chr7:34810002-34820000	intron (NR_015356, intron 1 of 4)	NR_033665	404744	NM_207283	ENSG00000197085	NPSR1-AS1	NPSR1 antisense RNA 1	ncRNA
hyper321	chr9:118040002-118050000	intron (NM_017418, intron 2 of 7)	NM_017418	50514	NM_017418	ENSG00000173077	2018-12-01	deleted in esophageal cancer 1	protein-coding
hyper322	chr8:36710002-36720000	intron (NR_134267, intron 18 of 27)	NM_001031836	157855	NM_001031836	ENSG00000215262	KCNU1	potassium calcium-activated channel subfamily U member 1	protein-coding
hyper323	chr2:23330002-23340000	Intergenic	NM_052920	114818	NM_025067	ENSG00000119771	KLHL29	kelch like family member 29	protein-coding
hyper324	chr9:89290002-89300000	Intergenic	NM_002048	2619	NM_002048	ENSG00000180447	GAS1	growth arrest specific 1	protein-coding
hyper325	chr4:53200002-53210000	Intergenic	NM_145263	132671	NM_145263	ENSG00000163071	SPATA18	spermatogenesis associated 18	protein-coding
hyper326	chr1:69720002-69730000	Intergenic	NM_001330635	57554	NM_020794	ENSG00000033122	LRRC7	leucine rich repeat containing 7	protein-coding
hyper327	chr8:56880002-56890000	intron (NM_002350, intron 10 of 12)	NM_002350	4067	NM_002350	ENSG00000254087	LYN	LYN proto-oncogene, Src family tyrosine kinase	protein-coding
hyper328	chr5:95460002-95470000	intron (NR_130776, intron 1 of 4)	NR_030309	693168	NR_030309	ENSG00000207578	MIR583	microRNA 583	ncRNA
hyper329	chr11:108920002-108930000	Intergenic	NM_207645	399947	NM_207645	ENSG00000185742	C11orf87	chromosome 11 open reading frame 87	protein-coding
hyper33	chr3:117790002-117800000	Intergenic	NR_135573	101926968	NR_135573		LOC101926968	uncharacterized LOC101926968	ncRNA
hyper330	chr8:80490002-80500000	Intergenic	NM_007029	11075	NM_007029	ENSG00000104435	STMN2	stathmin 2	protein-coding
hyper331	chr6:23130002-23140000	Intergenic	NR_134613	105374972	NR_134613		LOC105374972	uncharacterized LOC105374972	ncRNA
hyper332	chr1:109850002-109860000	3' UTR (NM_001205228, exon 20 of 20)	NM_001265613	343263	NM_001010985	ENSG00000221986	MYBPHL	myosin binding protein H like	protein-coding
hyper333	chr14:28380002-28390000	Intergenic	NR_130461	100422830	NR_130461	ENSG00000264657	MIR3171	microRNA 3171	ncRNA
hyper334	chr3:170450002-170460000	intron (NR_135556, intron 5 of 5)	NR_135259	200916	NM_001099645	ENSG00000163584	RPL22L1	ribosomal protein L22 like 1	protein-coding
hyper335	chr15:69290002-69300000	intron (NR_033671, intron 2 of 16)	NM_024505	79400	NM_024505	ENSG00000255346	NOX5	NADPH oxidase 5	protein-coding
hyper336	chr5:157470002-157480000	Intergenic	NM_001195556	9685	NM_014666	ENSG00000113282	CLINT1	clathrin interactor 1	protein-coding
hyper337	chr10:20730002-20740000	Intergenic	NR_039822	100616383	NR_039822	ENSG00000265372	MIR4675	microRNA 4675	ncRNA
hyper338	chr21:38910002-38920000	Intergenic	NM_130438	1859	NM_001396	ENSG00000157540	DYRK1A	dual specificity tyrosine phosphorylation regulated kinase 1A	protein-coding
hyper339	chr10:22590002-22600000	Intergenic	NM_001204062	100532731	NM_001204062	ENSG00000269897	COMMD3-BMI1	COMMD3-BMI1 readthrough	protein-coding
hyper34	chr8:83240002-83250000	Intergenic	NM_152836	64089	NM_022133	ENSG00000104497	SNX16	sorting nexin 16	protein-coding
hyper340	chr5:128470002-128480000	Intergenic	NR_039776	100616175	NR_039776	ENSG00000264563	MIR4633	microRNA 4633	ncRNA
hyper341	chr9:27680002-27690000	Intergenic	NM_001256054	203228	NM_018325	ENSG00000147894	C9orf72	chromosome 9 open reading frame 72	protein-coding
hyper342	chr2:188160002-188170000	Intergenic	NM_005795	10203	NM_005795	ENSG00000064989	CALCRL	calcitonin receptor like receptor	protein-coding
hyper343	chr1:119750002-119760000	intron (NR_125975, intron 4 of 6)	NM_201263	10352	NM_015836	ENSG00000116874	WARS2	tryptophanyl tRNA synthetase 2, mitochondrial	protein-coding
hyper344	chr13:80060002-80070000	intron (NM_019080, intron 1 of 7)	NR_046685	100874208	NR_046685	ENSG00000232132	NDFIP2-AS1	NDFIP2 antisense RNA 1	ncRNA
hyper345	chr12:64180002-64190000	intron (NM_001278237, intron 3 of 5)	NM_001278237	10329	NM_014254	ENSG00000118600	TMEM5	transmembrane protein 5	protein-coding
hyper346	chr10:111150002-111160000	Intergenic	NM_001324136	7511	NM_020383	ENSG00000108039	XPNPEP1	X-prolyl aminopeptidase 1	protein-coding
hyper347	chr2:71870002-71880000	intron (NM_001130978, intron 42 of 55)	NM_001130983	8291	NM_003494	ENSG00000135636	DYSF	dysferlin	protein-coding
hyper348	chr3:61580002-61590000	intron (NM_002841, intron 1 of 29)	NM_002841	5793	NM_002841	ENSG00000144724	PTPRG	protein tyrosine phosphatase, receptor type G	protein-coding
hyper349	chr2:123490002-123500000	Intergenic	NR_048558	7247	NM_004622	ENSG00000211460	TSN	translin	protein-coding
hyper35	chr5:23700002-23710000	Intergenic	NM_001310214	56979	NM_020227	ENSG00000164256	PRDM9	PR/SET domain 9	protein-coding
hyper350	chr20:54530002-54540000	Intergenic	NM_080617	140689	NM_080617	ENSG00000054803	CBLN4	cerebellin 4 precursor	protein-coding
hyper351	chr17:31220002-31230000	Intergenic	NM_001303280	4642	NM_015194	ENSG00000176658	MYO1D	myosin ID	protein-coding
hyper352	chr6:78040002-78050000	Intergenic	NM_000863	3351	NM_000863	ENSG00000135312	HTR1B	5-hydroxytryptamine receptor 1B	protein-coding
hyper353	chr5:144910002-144920000	Intergenic	NM_182960	153768	NM_138492	ENSG00000186314	PRELID2	PRELI domain containing 2	protein-coding
hyper354	chr5:4710002-4720000	Intergenic	NR_104619	101929153	NR_104619	ENSG00000249521	LINC02114	long intergenic non-protein coding RNA 2114	ncRNA
hyper355	chr14:91380002-91390000	intron (NM_001322227, intron 8 of 17)	NM_001010854	145567	NM_001010854	ENSG00000165914	TTC7B	tetratricopeptide repeat domain 7B	protein-coding
hyper356	chr15:53300002-53310000	Intergenic	NM_004498	3175	NM_004498	ENSG00000169856	ONECUT1	one cut homeobox 1	protein-coding
hyper357	chr12:8740002-8750000	Intergenic	NM_001330343	57379	NM_020661	ENSG00000111732	AICDA	activation induced cytidine deaminase	protein-coding
hyper358	chr20:36900002-36910000	intron (NR_104170, intron 1 of 1)	NM_001029864	85449	NM_001029864	ENSG00000149633	KIAA1755	KIAA1755	protein-coding
hyper359	chr20:38280002-38290000	Intergenic	NR_109936	100505663	NR_109936	ENSG00000237767	LINC01370	long intergenic non-protein coding RNA 1370	ncRNA
hyper36	chr14:22680002-22690000	Intergenic	NM_001344	1603	NM_001344	ENSG00000129562	DAD1	defender against cell death 1	protein-coding
hyper360	chr2:72140002-72150000	Intergenic	NM_019885	56603	NM_019885	ENSG00000003137	CYP26B1	cytochrome P450 family 26 subfamily B member 1	protein-coding
hyper361	chr10:15280002-15290000	intron (NM_001010924, intron 5 of 7)	NM_001308295	9397	NM_004808	ENSG00000152465	NMT2	N-myristoyltransferase 2	protein-coding
hyper362	chr9:81770002-81780000	Intergenic	NR_109771	101927450	NR_109771	ENSG00000260995	LOC101927450	uncharacterized LOC101927450	ncRNA
hyper363	chr8:28130002-28140000	Intergenic	NM_006228	5368	NM_006228	ENSG00000168081	PNOC	prepronociceptin	protein-coding
hyper364	chr1:38140002-38150000	Intergenic	NM_001303031	54955	NM_017850	ENSG00000116922	C1orf109	chromosome 1 open reading frame 109	protein-coding
hyper365	chr9:102110002-102120000	Intergenic	NR_102270	100996569	NR_102270	ENSG00000271086	NAMA	non-protein coding RNA, associated with MAP kinase pathway and growth arrest	ncRNA
hyper366	chr8:65310002-65320000	Intergenic	NR_029669	406908	NR_029669	ENSG00000207816	MIR124-2	microRNA 124-2	ncRNA
hyper367	chr5:155460002-155470000	Intergenic	NM_000337	6444	NM_000337	ENSG00000170624	SGCD	sarcoglycan delta	protein-coding
hyper368	chr8:25090002-25100000	intron (NM_001322810, intron 1 of 3)	NM_024940	80005	NM_024940	ENSG00000147459	DOCK5	dedicator of cytokinesis 5	protein-coding
hyper369	chr6:120150002-120160000	intron (NR_134600, intron 2 of 3)	NR_036098	100422951	NR_036098	ENSG00000265725	MIR3144	microRNA 3144	ncRNA
hyper37	chr20:1470002-1480000	Intergenic	NM_001122962	284759	NM_001122962	ENSG00000196209	SIRPB2	signal regulatory protein beta 2	protein-coding
hyper370	chr8:48220002-48230000	intron (NR_104581, intron 5 of 16)	NM_001282916	23514	NM_001080394	ENSG00000164808	SPIDR	scaffolding protein involved in DNA repair	protein-coding
hyper371	chr2:107890002-107900000	intron (NR_049853, intron 2 of 3)	NR_049853	100847045	NR_049853	ENSG00000283146	MIR548AU	microRNA 548au	ncRNA
hyper372	chr2:67760002-67770000	Intergenic	NM_019002	54465	NM_019002	ENSG00000143971	ETAA1	Ewing tumor associated antigen 1	protein-coding
hyper373	chr4:33950002-33960000	intron (NR_125902, intron 3 of 4)	NR_125902	101928622	NR_125902	ENSG00000250954	LOC101928622	uncharacterized LOC101928622	ncRNA
hyper374	chr11:4160002-4170000	Intergenic	NM_001330193	6240	NM_001033	ENSG00000167325	RRM1	ribonucleotide reductase catalytic subunit M1	protein-coding
hyper375	chr17:35150002-35160000	Intergenic	NR_135668	102723471	NR_135668	ENSG00000277268	LOC102723471	uncharacterized LOC102723471	ncRNA
hyper376	chr13:79200002-79210000	intron (NM_024546, intron 5 of 5)	NM_006237	5457	NM_006237	ENSG00000152192	POU4F1	POU class 4 homeobox 1	protein-coding
hyper377	chr9:6090002-6100000	Intergenic	NM_001243203	26953	NM_012416	ENSG00000137040	RANBP6	RAN binding protein 6	protein-coding
hyper378	chr10:132100002-132110000	Intergenic	NM_001321980	10539	NM_006541	ENSG00000108010	GLRX3	glutaredoxin 3	protein-coding
hyper379	chr6:4390002-4400000	Intergenic	NR_106988	102465753	NR_106988	ENSG00000280494	MIR7641-2	microRNA 7641-2	ncRNA
hyper38	chr6:69200002-69210000	Intergenic	NR_125872	101928307	NR_125872	ENSG00000230910	LOC101928307	uncharacterized LOC101928307	ncRNA
hyper380	chr2:230950002-230960000	Intergenic	NM_152527	151473	NM_152527	ENSG00000163053	SLC16A14	solute carrier family 16 member 14	protein-coding
hyper381	chr4:101940002-101950000	3' UTR (NM_000944, exon 14 of 14)	NR_107033	102465868	NR_107033	ENSG00000273882	MIR8066	microRNA 8066	ncRNA
hyper382	chr1:93060002-93070000	intron (NM_005665, intron 16 of 17)	NM_005263	2672	NM_005263	ENSG00000162676	GFI1	growth factor independent 1 transcriptional repressor	protein-coding
hyper383	chr10:85000002-85010000	Intergenic	NR_134317	105378397	NR_134317		LOC105378397	uncharacterized LOC105378397	ncRNA
hyper384	chr19:42260002-42270000	intron (NM_002483, intron 2 of 5)	NM_002483	4680	NM_002483	ENSG00000086548	CEACAM6	carcinoembryonic antigen related cell adhesion molecule 6	protein-coding
hyper385	chr12:25810002-25820000	Intergenic	NM_001145727	160492	NM_152590	ENSG00000152936	LMNTD1	lamin tail domain containing 1	protein-coding
hyper386	chr11:46680002-46690000	intron (NM_001346360, intron 11 of 16)	NM_004308	392	NM_004308	ENSG00000175220	ARHGAP1	Rho GTPase activating protein 1	protein-coding
hyper387	chr5:3370002-3380000	Intergenic	NR_104618	102467075	NR_104618	ENSG00000250716	LINC01017	long intergenic non-protein coding RNA 1017	ncRNA
hyper388	chr14:57010002-57020000	intron (NR_135241, intron 1 of 1)	NM_017799	54916	NM_017799	ENSG00000070269	TMEM260	transmembrane protein 260	protein-coding
hyper389	chr9:18590002-18600000	intron (NM_001040272, intron 4 of 28)	NR_036107	100422869	NR_036107	ENSG00000264638	MIR3152	microRNA 3152	ncRNA
hyper39	chr11:105650002-105660000	intron (NM_001077243, intron 4 of 16)	NM_001112812	2893	NM_000829	ENSG00000152578	GRIA4	glutamate ionotropic receptor AMPA type subunit 4	protein-coding
hyper390	chr4:81360002-81370000	intron (NM_152770, intron 2 of 5)	NM_001206997	255119	NM_152770	ENSG00000197826	C4orf22	chromosome 4 open reading frame 22	protein-coding
hyper391	chr4:142010002-142020000	intron (NM_020724, intron 1 of 6)	NM_020724	57484	NM_020724	ENSG00000170153	RNF150	ring finger protein 150	protein-coding
hyper392	chr4:84150002-84160000	Intergenic	NM_015697	27235	NM_015697	ENSG00000173085	COQ2	coenzyme Q2, polyprenyltransferase	protein-coding
hyper393	chr3:37620002-37630000	intron (NM_002207, intron 15 of 27)	NM_002207	3680	NM_002207	ENSG00000144668	ITGA9	integrin subunit alpha 9	protein-coding
hyper394	chr1:242940002-242950000	Intergenic	NM_001320272	200150	NM_152666	ENSG00000180287	PLD5	phospholipase D family member 5	protein-coding
hyper395	chr9:80320002-80330000	Intergenic	NM_004297	9630	NM_004297	ENSG00000156049	GNA14	G protein subunit alpha 14	protein-coding
hyper396	chr2:133130002-133140000	Intergenic	NR_135203	339742	NR_135203		FAM201B	family with sequence similarity 201 member B	ncRNA
hyper397	chr15:90740002-90750000	intron (NM_198925, intron 1 of 13)	NM_001324032	10509	NM_020210	ENSG00000185033	SEMA4B	semaphorin 4B	protein-coding
hyper398	chr4:37540002-37550000	intron (NM_001104629, intron 1 of 3)	NM_018302	55286	NM_018302	ENSG00000154274	C4orf19	chromosome 4 open reading frame 19	protein-coding
hyper399	chr3:175320002-175330000	intron (NM_207015, intron 10 of 13)	NR_046714	100874245	NR_046714		NAALADL2-AS1	NAALADL2 antisense RNA 1	ncRNA
hyper4	chrX:101240002-101250000	Intergenic	NM_001282401	84460	NM_001011657	ENSG00000166432	ZMAT1	zinc finger matrin-type 1	protein-coding
hyper40	chr9:24040002-24050000	Intergenic	NM_004432	1993	NM_004432	ENSG00000107105	ELAVL2	ELAV like RNA binding protein 2	protein-coding
hyper400	chr7:39690002-39700000	intron (NM_005402, intron 1 of 4)	NM_005402	5898	NM_005402	ENSG00000006451	RALA	RAS like proto-oncogene A	protein-coding
hyper401	chr5:57520002-57530000	Intergenic	NR_104669	101928569	NR_104669		LINC02101	long intergenic non-protein coding RNA 2101	ncRNA
hyper402	chr3:156240002-156250000	intron (NM_172159, intron 12 of 13)	NM_001308205	6747	NM_007107	ENSG00000114850	SSR3	signal sequence receptor subunit 3	protein-coding
hyper403	chr4:95390002-95400000	intron (NM_001256428, intron 2 of 11)	NM_001256426	10611	NM_006457	ENSG00000163110	PDLIM5	PDZ and LIM domain 5	protein-coding
hyper404	chr6:163900002-163910000	intron (NM_206854, intron 3 of 6)	NM_206855	9444	NM_006775	ENSG00000112531	QKI	QKI, KH domain containing RNA binding	protein-coding
hyper405	chr20:13590002-13600000	intron (NM_001323604, intron 4 of 14)	NM_001323602	55617	NM_017714	ENSG00000089123	TASP1	taspase 1	protein-coding
hyper406	chr5:108840002-108850000	Intergenic	NM_014819	9867	NM_014819	ENSG00000198961	PJA2	praja ring finger ubiquitin ligase 2	protein-coding
hyper407	chr7:23920002-23930000	Intergenic	NM_001260504	56164	NM_031414	ENSG00000196335	STK31	serine/threonine kinase 31	protein-coding
hyper408	chr2:46460002-46470000	Intergenic	NM_001430	2034	NM_001430	ENSG00000116016	EPAS1	endothelial PAS domain protein 1	protein-coding
hyper409	chr10:130380002-130390000	Intergenic	NR_120619	101927381	NR_120619	ENSG00000280953	LINC01163	long intergenic non-protein coding RNA 1163	ncRNA
hyper41	chr11:36850002-36860000	Intergenic	NM_000536	5897	NM_000536	ENSG00000175097	RAG2	recombination activating 2	protein-coding
hyper410	chr21:30080002-30090000	Intergenic	NM_182749	29104	NM_013240	ENSG00000156239	N6AMT1	N-6 adenine-specific DNA methyltransferase 1 (putative)	protein-coding
hyper411	chr1:44900002-44910000	intron (NM_001319957, intron 1 of 13)	NM_001319957	55182	NM_018150	ENSG00000187147	RNF220	ring finger protein 220	protein-coding
hyper412	chr5:132880002-132890000	intron (NM_015082, intron 3 of 15)	NM_015082	23105	NM_015082	ENSG00000053108	FSTL4	follistatin like 4	protein-coding
hyper413	chr5:136710002-136720000	intron (NM_004598, intron 2 of 10)	NM_004598	6695	NM_004598	ENSG00000152377	SPOCK1	SPARC/osteonectin, cwcv and kazal like domains proteoglycan 1	protein-coding
hyper414	chr15:90880002-90890000	Intergenic	NR_028287	23766	NR_028287		GABARAPL3	GABA type A receptor associated protein like 3 pseudogene	pseudo
hyper415	chr21:42030002-42040000	intron (NM_001389, intron 3 of 32)	NR_046774	100874326	NR_046774	ENSG00000233756	DSCAM-IT1	DSCAM intronic transcript 1	ncRNA
hyper416	chr2:182520002-182530000	Intergenic	NR_027690	375298	NM_201548	ENSG00000188452	CERKL	ceramide kinase like	protein-coding
hyper417	chr5:52520002-52530000	Intergenic	NR_104654	257396	NR_034107	ENSG00000247796	LOC257396	uncharacterized LOC257396	ncRNA
hyper418	chr8:39940002-39950000	Intergenic	NM_020130	56892	NM_020130	ENSG00000176907	C8orf4	chromosome 8 open reading frame 4	protein-coding
hyper419	chr1:180120002-180130000	intron (NM_001004128, intron 1 of 12)	NM_001004128	5768	NM_002826	ENSG00000116260	QSOX1	quiescin sulfhydryl oxidase 1	protein-coding
hyper42	chr2:198720002-198730000	intron (NM_006226, intron 1 of 5)	NM_006226	5334	NM_006226	ENSG00000115896	PLCL1	phospholipase C like 1	protein-coding
hyper420	chr11:101630002-101640000	Intergenic	NM_020802	57562	NM_020802	ENSG00000110318	CEP126	centrosomal protein 126	protein-coding
hyper421	chr18:45840002-45850000	intron (NM_001318841, intron 2 of 4)	NM_001318841	201501	NM_001039360	ENSG00000184828	ZBTB7C	zinc finger and BTB domain containing 7C	protein-coding
hyper422	chr7:40130002-40140000	3' UTR (NM_031267, exon 14 of 14)	NM_138701	136647	NM_138701	ENSG00000168303	MPLKIP	M-phase specific PLK1 interacting protein	protein-coding
hyper423	chr21:39370002-39380000	Intergenic	NM_002240	3763	NM_002240	ENSG00000157542	KCNJ6	potassium voltage-gated channel subfamily J member 6	protein-coding
hyper424	chr9:104820002-104830000	Intergenic	NM_133445	116443	NM_133445	ENSG00000198785	GRIN3A	glutamate ionotropic receptor NMDA type subunit 3A	protein-coding
hyper425	chr13:20900002-20910000	Intergenic	NM_001110219	10804	NM_006783	ENSG00000121742	GJB6	gap junction protein beta 6	protein-coding
hyper426	chr10:117940002-117950000	intron (NM_001145453, intron 4 of 9)	NM_145793	2674	NM_005264	ENSG00000151892	GFRA1	GDNF family receptor alpha 1	protein-coding
hyper427	chr7:117950002-117960000	Intergenic	NM_019644	56311	NM_019644	ENSG00000106013	ANKRD7	ankyrin repeat domain 7	protein-coding
hyper428	chr17:33710002-33720000	Intergenic	NM_001104590	91607	NM_152270	ENSG00000172716	SLFN11	schlafen family member 11	protein-coding
hyper429	chr20:48810002-48820000	Intergenic	NR_125739	101927559	NR_125739	ENSG00000277449	CEBPB-AS1	CEBPB antisense RNA 1	ncRNA
hyper43	chr8:77400002-77410000	intron (NR_105006, intron 3 of 5)	NR_105006	101926978	NR_105006	ENSG00000254300	LINC01111	long intergenic non-protein coding RNA 1111	ncRNA
hyper430	chr2:60280002-60290000	Intergenic	NR_132991	106660609	NR_132991	ENSG00000223929	MIR4432HG	MIR4432 host gene	ncRNA
hyper431	chr8:8360002-8370000	Intergenic	NM_001080826	157285	NM_001080826	ENSG00000275342	PRAG1	PEAK1 related kinase activating pseudokinase 1	protein-coding
hyper432	chr21:38230002-38240000	intron (NM_000411, intron 7 of 11)	NM_001242784	3141	NM_000411	ENSG00000159267	HLCS	holocarboxylase synthetase	protein-coding
hyper433	chr7:152970002-152980000	Intergenic	NR_125776	103724390	NR_125776	ENSG00000234722	LINC01287	long intergenic non-protein coding RNA 1287	ncRNA
hyper434	chr5:171210002-171220000	intron (NM_001289970, intron 1 of 3)	NM_001289970	644994	NM_001289970		SMIM23	small integral membrane protein 23	protein-coding
hyper435	chr8:77410002-77420000	intron (NR_105006, intron 3 of 5)	NR_105006	101926978	NR_105006	ENSG00000254300	LINC01111	long intergenic non-protein coding RNA 1111	ncRNA
hyper436	chr1:233750002-233760000	intron (NM_002245, intron 1 of 2)	NR_039625	100616390	NR_039625	ENSG00000265744	MIR4427	microRNA 4427	ncRNA
hyper437	chr22:22680002-22690000	Intergenic	NR_027293	96610	NM_080926	ENSG00000236850	BMS1P20	BMS1, ribosome biogenesis factor pseudogene 20	pseudo
hyper438	chr1:214390002-214400000	Intergenic	NM_020197	56950	NM_020197	ENSG00000143499	SMYD2	SET and MYND domain containing 2	protein-coding
hyper439	chr15:64110002-64120000	intron (NM_003922, intron 1 of 77)	NM_003922	8925	NM_003922	ENSG00000103657	HERC1	HECT and RLD domain containing E3 ubiquitin protein ligase family member 1	protein-coding
hyper44	chr14:84180002-84190000	Intergenic	NR_135155	105370605	NR_135155	ENSG00000258814	LOC105370605	uncharacterized LOC105370605	ncRNA
hyper440	chr7:21190002-21200000	Intergenic	NR_137166	6671	NM_003112	ENSG00000105866	SP4	Sp4 transcription factor	protein-coding
hyper441	chr17:38130002-38140000	TTS (NM_178171)	NM_002809	5709	NM_002809	ENSG00000108344	PSMD3	proteasome 26S subunit, non-ATPase 3	protein-coding
hyper442	chr13:40720002-40730000	Intergenic	NR_046870	100874127	NR_046870	ENSG00000230710	LINC00332	long intergenic non-protein coding RNA 332	ncRNA
hyper443	chr1:193080002-193090000	Intergenic	NM_024529	79577	NM_024529	ENSG00000134371	CDC73	cell division cycle 73	protein-coding
hyper444	chr8:135410002-135420000	Intergenic	NR_002438	594840	NR_002438	ENSG00000248492	ZFAT-AS1	ZFAT antisense RNA 1	ncRNA
hyper445	chr9:14000002-14010000	Intergenic	NR_038194	100113404	NR_038194	ENSG00000205636	LINC00583	long intergenic non-protein coding RNA 583	ncRNA
hyper45	chr6:141630002-141640000	Intergenic	NR_039675	100616180	NR_039675	ENSG00000264390	MIR4465	microRNA 4465	ncRNA
hyper46	chr14:85470002-85480000	Intergenic	NR_135155	105370605	NR_135155	ENSG00000258814	LOC105370605	uncharacterized LOC105370605	ncRNA
hyper47	chrX:78980002-78990000	Intergenic	NM_001109879	50945	NM_016954	ENSG00000122145	TBX22	T-box 22	protein-coding
hyper48	chr5:45390002-45400000	intron (NM_021072, intron 4 of 7)	NM_021072	348980	NM_021072	ENSG00000164588	HCN1	hyperpolarization activated cyclic nucleotide gated potassium channel 1	protein-coding
hyper49	chr20:47480002-47490000	Intergenic	NM_020820	57580	NM_020820	ENSG00000124126	PREX1	phosphatidylinositol-3,4,5-trisphosphate dependent Rac exchange factor 1	protein-coding
hyper5	chr2:52760002-52770000	Intergenic	NR_039630	100616431	NR_039630	ENSG00000264975	MIR4431	microRNA 4431	ncRNA
hyper50	chr7:62230002-62240000	Intergenic	NR_003952	643955	NR_003952	ENSG00000185037	ZNF733P	zinc finger protein 733, pseudogene	pseudo
hyper51	chr14:40770002-40780000	Intergenic	NR_109757	644919	NR_109757		LOC644919	uncharacterized LOC644919	ncRNA
hyper52	chr9:19860002-19870000	Intergenic	NM_020344	25769	NM_020344	ENSG00000155886	SLC24A2	solute carrier family 24 member 2	protein-coding
hyper53	chr2:166870002-166880000	intron (NR_110598, intron 2 of 3)	NM_006920	6323	NM_006920	ENSG00000144285	SCN1A	sodium voltage-gated channel alpha subunit 1	protein-coding
hyper54	chr1:189230002-189240000	Intergenic	NM_001317188	339479	NM_199051	ENSG00000162670	BRINP3	BMP/retinoic acid inducible neural specific 3	protein-coding
hyper55	chr8:39240002-39250000	intron (NR_001448, intron 11 of 14)	NR_001448	255926	NM_001040073	ENSG00000196115	ADAM5	ADAM metallopeptidase domain 5 (pseudogene)	pseudo
hyper56	chr7:46680002-46690000	Intergenic	NR_134575	730338	NR_134575	ENSG00000233539	LOC730338	uncharacterized LOC730338	ncRNA
hyper57	chr21:27930002-27940000	intron (NR_135515, intron 3 of 3)	NM_052954	116159	NM_052954	ENSG00000166265	CYYR1	cysteine and tyrosine rich 1	protein-coding
hyper58	chr4:65910002-65920000	Intergenic	NR_033976	401134	NR_033976	ENSG00000250125	LOC401134	uncharacterized LOC401134	ncRNA
hyper59	chr18:10620002-10630000	Intergenic	NR_110777	101927410	NR_110777	ENSG00000260779	LOC101927410	uncharacterized LOC101927410	ncRNA
hyper6	chr4:66140002-66150000	Intergenic	NR_033976	401134	NR_033976	ENSG00000250125	LOC401134	uncharacterized LOC401134	ncRNA
hyper60	chr6:102160002-102170000	intron (NM_001166247, intron 6 of 16)	NM_021956	2898	NM_021956	ENSG00000164418	GRIK2	glutamate ionotropic receptor kainate type subunit 2	protein-coding
hyper61	chr5:57480002-57490000	Intergenic	NR_104669	101928569	NR_104669		LINC02101	long intergenic non-protein coding RNA 2101	ncRNA
hyper62	chr12:75650002-75660000	Intergenic	NM_139136	3747	NM_139136	ENSG00000166006	KCNC2	potassium voltage-gated channel subfamily C member 2	protein-coding
hyper63	chrX:33510002-33520000	Intergenic	NM_000109	1756	NM_000109	ENSG00000198947	DMD	dystrophin	protein-coding
hyper64	chr11:95860002-95870000	intron (NM_032427, intron 1 of 4)	NM_201278	8898	NM_016156	ENSG00000087053	MTMR2	myotubularin related protein 2	protein-coding
hyper65	chr7:109660002-109670000	Intergenic	NR_003024	442720	NR_003024	ENSG00000237064	EIF3IP1	eukaryotic translation initiation factor 3 subunit I pseudogene 1	pseudo
hyper66	chr4:144420002-144430000	Intergenic	NM_003601	8467	NM_003601	ENSG00000153147	SMARCA5	SWI/SNF related, matrix associated, actin dependent regulator of chromatin, subfamily a, member 5	protein-coding
hyper67	chr8:111330002-111340000	Intergenic	NM_014379	27012	NM_014379	ENSG00000164794	KCNV1	potassium voltage-gated channel modifier subfamily V member 1	protein-coding
hyper68	chr13:76880002-76890000	Intergenic	NR_126373	104326189	NR_126373	ENSG00000223458	LMO7DN-IT1	LMO7DN intronic transcript 1	ncRNA
hyper69	chr1:42460002-42470000	intron (NR_038261, intron 1 of 3)	NR_038261	59269	NM_024503	ENSG00000127124	HIVEP3	human immunodeficiency virus type I enhancer binding protein 3	protein-coding
hyper7	chrY:6740002-6750000	Intergenic	NM_001143	266	NM_001143	ENSG00000099721	AMELY	amelogenin, Y-linked	protein-coding
hyper70	chr1:98910002-98920000	Intergenic	NR_033716	51375	NM_015976	ENSG00000162627	SNX7	sorting nexin 7	protein-coding
hyper71	chr4:48240002-48250000	intron (NM_003215, intron 1 of 17)	NM_003215	7006	NM_003215	ENSG00000135605	TEC	tec protein tyrosine kinase	protein-coding
hyper72	chr2:215020002-215030000	intron (NR_047660, intron 14 of 14)	NM_001345929	402117	NM_001080500	ENSG00000174453	VWC2L	von Willebrand factor C domain containing protein 2-like	protein-coding
hyper73	chr4:60780002-60790000	Intergenic	NR_133942	105377247	NR_133941	ENSG00000251266	LOC105377247	uncharacterized LOC105377247	ncRNA
hyper74	chr1:50420002-50430000	intron (NM_001323573, intron 1 of 12)	NM_032785	84871	NM_032785	ENSG00000186094	AGBL4	ATP/GTP binding protein like 4	protein-coding
hyper75	chr10:71320002-71330000	Intergenic	NM_020999	50674	NM_020999	ENSG00000122859	NEUROG3	neurogenin 3	protein-coding
hyper76	chr9:97120002-97130000	Intergenic	NM_032558	84641	NM_032558	ENSG00000148110	MFSD14B	major facilitator superfamily domain containing 14B	protein-coding
hyper77	chr8:93230002-93240000	Intergenic	NR_106988	102465753	NR_106988	ENSG00000280494	MIR7641-2	microRNA 7641-2	ncRNA
hyper78	chr1:98130002-98140000	intron (NM_000110, intron 8 of 22)	NR_046591	100873933	NR_046591	ENSG00000235777	DPYD-AS2	DPYD antisense RNA 2	ncRNA
hyper79	chr5:28320002-28330000	Intergenic	NR_134265	105374698	NR_134265	ENSG00000249785	LINC02103	long intergenic non-protein coding RNA 2103	ncRNA
hyper8	chr14:19670002-19680000	intron (NR_073460, intron 2 of 2).3	NR_073459	414763	NR_073459		BMS1P18	BMS1, ribosome biogenesis factor pseudogene 18	pseudo
hyper80	chr4:74770002-74780000	Intergenic	NM_001511	2919	NM_001511	ENSG00000163739	CXCL1	C-X-C motif chemokine ligand 1	protein-coding
hyper81	chr13:90320002-90330000	Intergenic	NR_046991	100874139	NR_046991		LINC00353	long intergenic non-protein coding RNA 353	ncRNA
hyper82	chr5:90730002-90740000	Intergenic	NM_020801	57561	NM_020801	ENSG00000113369	ARRDC3	arrestin domain containing 3	protein-coding
hyper83	chr4:53340002-53350000	Intergenic	NM_001134223	64854	NM_022832	ENSG00000109189	USP46	ubiquitin specific peptidase 46	protein-coding
hyper84	chr16:34230002-34240000	Intergenic	NR_002837	606551	NR_002837		UBE2MP1	ubiquitin conjugating enzyme E2 M pseudogene 1	pseudo
hyper85	chr8:97700002-97710000	intron (NM_016134, intron 1 of 7)	NM_016134	10404	NM_016134	ENSG00000104324	CPQ	carboxypeptidase Q	protein-coding
hyper86	chr10:94510002-94520000	Intergenic	NM_002729	3087	NM_002729	ENSG00000152804	HHEX	hematopoietically expressed homeobox	protein-coding
hyper87	chr5:96590002-96600000	Intergenic	NM_018343	55781	NM_018343	ENSG00000058729	RIOK2	RIO kinase 2	protein-coding
hyper88	chr8:87940002-87950000	intron (NM_173538, intron 3 of 10)	NM_173538	168975	NM_173538	ENSG00000176571	CNBD1	cyclic nucleotide binding domain containing 1	protein-coding
hyper89	chr1:187540002-187550000	Intergenic	NR_132374	106144535	NR_132374	ENSG00000231599	LINC01037	long intergenic non-protein coding RNA 1037	ncRNA
hyper9	chr2:52750002-52760000	Intergenic	NR_135239	105374596	NR_135239	ENSG00000225444	LINC01867	long intergenic non-protein coding RNA 1867	ncRNA
hyper90	chr2:129640002-129650000	Intergenic	NR_110278	101927881	NR_110278		LOC101927881	uncharacterized LOC101927881	ncRNA
hyper91	chr1:66890002-66900000	Intergenic	NM_001297442	5142	NM_002600	ENSG00000184588	PDE4B	phosphodiesterase 4B	protein-coding
hyper92	chr4:136140002-136150000	Intergenic	NR_103762	100507528	NR_103762	ENSG00000248330	LINC00613	long intergenic non-protein coding RNA 613	ncRNA
hyper93	chr3:188400002-188410000	intron (NM_001167671, intron 6 of 10)	NR_029502	407020	NR_029502	ENSG00000207651	MIR28	microRNA 28	ncRNA
hyper94	chr5:110460002-110470000	3' UTR (NM_139281, exon 23 of 23)	NM_139281	134430	NM_139281	ENSG00000134987	WDR36	WD repeat domain 36	protein-coding
hyper95	chr5:150230002-150240000	intron (NM_001346557, intron 2 of 3)	NM_001346557	345611	NM_001145805	ENSG00000237693	IRGM	immunity related GTPase M	protein-coding			2569
hyper96	chr5:162970002-162980000	Intergenic	NM_013283	27430	NM_013283	ENSG00000038274	MAT2B	methionine adenosyltransferase 2B	protein-coding
hyper97	chr4:173610002-173620000	intron (NR_125894, intron 1 of 2)	NR_125895	101928314	NR_125894		LOC101928314	uncharacterized LOC101928314	ncRNA
hyper98	chr1:189340002-189350000	Intergenic	NM_001317188	339479	NM_199051	ENSG00000162670	BRINP3	BMP/retinoic acid inducible neural specific 3	protein-coding
hyper99	chr19:54800002-54810000	promoter-TSS (NM_001172654)	NM_006865	11026	NM_006865		LILRA3	leukocyte immunoglobulin like receptor A3	protein-coding		445
hypo1	chr19:47470002-47480000	intron (NM_004491, intron 2 of 5)	NM_002517	4861	NM_002517	ENSG00000130751	NPAS1	neuronal PAS domain protein 1	protein-coding
hypo10	chr1:117180002-117190000	intron (NM_001007237, intron 2 of 10)	NM_001542	3321	NM_001542	ENSG00000143061	IGSF3	immunoglobulin superfamily member 3	protein-coding
hypo100	chr17:62600002-62610000	intron (NM_022739, intron 1 of 18)	NM_022739	64750	NM_022739	ENSG00000108854	SMURF2	SMAD specific E3 ubiquitin protein ligase 2	protein-coding
hypo1000	chr2:1550002-1560000	Intergenic	NM_175722	7173	NM_000547	ENSG00000115705	TPO	thyroid peroxidase	protein-coding
hypo1001	chr8:143750002-143760000	intron (NR_033343, intron 1 of 2)	NR_033343	8000	NM_005672	ENSG00000167653	PSCA	prostate stem cell antigen	protein-coding
hypo1002	chr16:19550002-19560000	intron (NM_001323577, intron 8 of 12)	NM_001300743	57020	NM_020314	ENSG00000103544	C16orf62	chromosome 16 open reading frame 62	protein-coding
hypo1003	chr7:125360002-125370000	Intergenic	NR_110183	101928254	NR_110182	ENSG00000219445	LOC101928254	uncharacterized LOC101928254	ncRNA
hypo1004	chr2:237690002-237700000	Intergenic	NM_020311	57007	NM_020311	ENSG00000144476	ACKR3	atypical chemokine receptor 3	protein-coding
hypo1005	chr17:17900002-17910000	intron (NM_031294, intron 9 of 13)	NM_001130091	83450	NM_031294	ENSG00000171962	DRC3	dynein regulatory complex subunit 3	protein-coding
hypo1006	chr6:16220002-16230000	Intergenic	NM_006877	2766	NM_006877	ENSG00000137198	GMPR	guanosine monophosphate reductase	protein-coding
hypo1007	chr9:96740002-96750000	Intergenic	NR_144455	101928040	NR_144455		BARX1-AS1	BARX1 antisense RNA 1 (head to head)	ncRNA
hypo1008	chr19:54720002-54730000	intron (NM_001320960, intron 7 of 13)	NM_001321702	6203	NM_001013	ENSG00000170889	RPS9	ribosomal protein S9	protein-coding
hypo1009	chr13:42230002-42240000	intron (NM_015058, intron 37 of 44)	NR_049803	100847026	NR_049803	ENSG00000102763	MIR5006	microRNA 5006	ncRNA
hypo101	chr9:35280002-35290000	intron (NM_001330653, intron 7 of 39)	NR_003582	158381	NR_003581	ENSG00000179766	ATP8B5P	ATPase phospholipid transporting 8B5, pseudogene	pseudo
hypo1010	chr12:31630002-31640000	intron (NM_144973, intron 2 of 20)	NR_046909	100874249	NR_046909	ENSG00000255867	DENND5B-AS1	DENND5B antisense RNA 1	ncRNA
hypo1011	chr2:45260002-45270000	Intergenic	NM_016932	10736	NM_016932	ENSG00000170577	SIX2	SIX homeobox 2	protein-coding
hypo1012	chr8:141700002-141710000	intron (NM_001316342, intron 26 of 32)	NM_012154	27161	NM_012154	ENSG00000123908	AGO2	argonaute 2, RISC catalytic component	protein-coding
hypo1013	chr10:4260002-4270000	intron (NR_108040, intron 2 of 2)	NR_108040	100652988	NR_108040		LINC00702	long intergenic non-protein coding RNA 702	ncRNA
hypo1014	chr5:10860002-10870000	Intergenic	NM_001291963	1611	NM_004394	ENSG00000112977	DAP	death associated protein	protein-coding
hypo1015	chr2:24980002-24990000	intron (NM_147223, intron 19 of 21)	NR_136184	79172	NM_024322	ENSG00000138092	CENPO	centromere protein O	protein-coding
hypo1016	chr1:236910002-236920000	intron (NM_001278344, intron 17 of 22)	NM_001291940	4548	NM_000254	ENSG00000116984	MTR	5-methyltetrahydrofolate-homocysteine methyltransferase	protein-coding
hypo1017	chr2:99840002-99850000	Intergenic	NM_175735	254773	NM_175735	ENSG00000185674	LYG2	lysozyme g2	protein-coding
hypo1018	chr2:178970002-178980000	Intergenic	NM_001077197	50940	NM_016953	ENSG00000128655	PDE11A	phosphodiesterase 11A	protein-coding
hypo1019	chr2:160020002-160030000	intron (NM_033394, intron 8 of 26)	NR_106948	102465535	NR_106948	ENSG00000275141	MIR6888	microRNA 6888	ncRNA
hypo102	chr11:113540002-113550000	Intergenic	NM_001288751	80975	NM_030770	ENSG00000166682	TMPRSS5	transmembrane protease, serine 5	protein-coding
hypo1020	chr7:97350002-97360000	Intergenic	NM_003182	6863	NM_003182	ENSG00000006128	TAC1	tachykinin precursor 1	protein-coding
hypo1021	chr8:52680002-52690000	intron (NM_144651, intron 1 of 22)	NM_144651	137902	NM_144651	ENSG00000147485	PXDNL	peroxidasin like	protein-coding
hypo1022	chr19:33470002-33480000	intron (NM_033103, intron 14 of 14)	NM_001300978	91442	NM_152266	ENSG00000131944	FAAP24	Fanconi anemia core complex associated protein 24	protein-coding
hypo1023	chr2:47300002-47310000	Intergenic	NM_173649	285051	NM_173649	ENSG00000239605	C2orf61	chromosome 2 open reading frame 61	protein-coding
hypo1024	chr6:40460002-40470000	intron (NM_020737, intron 1 of 2)	NM_020737	57497	NM_020737	ENSG00000156564	LRFN2	leucine rich repeat and fibronectin type III domain containing 2	protein-coding
hypo1025	chr12:34380002-34390000	Intergenic	NM_032834	84920	NM_032834	ENSG00000139133	ALG10	ALG10, alpha-1,2-glucosyltransferase	protein-coding
hypo1026	chr9:108930002-108940000	Intergenic	NR_107048	102465995	NR_107048	ENSG00000277889	MIR8081	microRNA 8081	ncRNA
hypo1027	chr3:54750002-54760000	intron (NM_018398, intron 11 of 37)	NR_027122	790952	NR_027122	ENSG00000265992	ESRG	embryonic stem cell related (non-protein coding)	ncRNA
hypo1028	chr20:3760002-3770000	3' UTR (NM_001810, exon 1 of 1)	NM_001810	1059	NM_001810	ENSG00000125817	CENPB	centromere protein B	protein-coding
hypo1029	chr3:173840002-173850000	intron (NM_014932, intron 4 of 6)	NR_046664	100874010	NR_046664	ENSG00000228213	NLGN1-AS1	NLGN1 antisense RNA 1	ncRNA
hypo103	chr2:38930002-38940000	intron (NM_138801, intron 4 of 6)	NM_138801	130589	NM_138801	ENSG00000143891	GALM	galactose mutarotase	protein-coding
hypo1030	chr3:124520002-124530000	intron (NM_002213, intron 9 of 14)	NR_036088	100422864	NR_036088	ENSG00000265981	MIR544B	microRNA 544b	ncRNA
hypo1031	chr2:27730002-27740000	intron (NM_001486, intron 16 of 18)	NM_001486	2646	NM_001486	ENSG00000084734	GCKR	glucokinase regulator	protein-coding
hypo1032	chr6:108190002-108200000	intron (NM_007214, intron 19 of 20)	NM_001286408	256380	NM_198081	ENSG00000146285	SCML4	sex comb on midleg-like 4 (Drosophila)	protein-coding
hypo1033	chr5:10070002-10080000	Intergenic	NR_027112	285692	NR_027112	ENSG00000249781	LINC02112	long intergenic non-protein coding RNA 2112	ncRNA
hypo1034	chr1:96550002-96560000	Intergenic	NR_125991	102723661	NR_125991	ENSG00000237435	LOC102723661	uncharacterized LOC102723661	ncRNA
hypo1035	chr9:72890002-72900000	intron (NM_015110, intron 5 of 24)	NM_015110	23137	NM_015110	ENSG00000198887	SMC5	structural maintenance of chromosomes 5	protein-coding
hypo1036	chr8:72970002-72980000	intron (NM_007332, intron 6 of 26)	NM_007332	8989	NM_007332	ENSG00000104321	TRPA1	transient receptor potential cation channel subfamily A member 1	protein-coding
hypo1037	chr3:116740002-116750000	Intergenic	NR_121607	100506724	NR_121607	ENSG00000242385	LINC00901	long intergenic non-protein coding RNA 901	ncRNA
hypo1038	chr7:104750002-104760000	TTS (NM_018682)	NM_182931	55904	NM_018682	ENSG00000005483	KMT2E	lysine methyltransferase 2E	protein-coding
hypo1039	chrX:100390002-100400000	intron (NM_006733, intron 14 of 20)	NM_001318523	2491	NM_006733	ENSG00000102384	CENPI	centromere protein I	protein-coding
hypo104	chr2:225490002-225500000	Intergenic	NM_001257197	8452	NM_003590	ENSG00000036257	CUL3	cullin 3	protein-coding
hypo1040	chr7:63600002-63610000	Intergenic	NM_001159524	730291	NM_001159524	ENSG00000223614	ZNF735	zinc finger protein 735	protein-coding
hypo1041	chr5:42060002-42070000	Intergenic	NR_104635	101926960	NR_104635		LOC101926960	uncharacterized LOC101926960	ncRNA
hypo1042	chr12:13690002-13700000	Intergenic	NR_036555	283422	NM_182558	ENSG00000180861	LINC01559	long intergenic non-protein coding RNA 1559	ncRNA
hypo1043	chr1:221510002-221520000	Intergenic	NR_024236	400804	NR_024236	ENSG00000234754	C1orf140	uncharacterized LOC400804	ncRNA
hypo1044	chr8:24180002-24190000	intron (NR_130710, intron 10 of 22)	NM_001304351	10863	NM_014265	ENSG00000042980	ADAM28	ADAM metallopeptidase domain 28	protein-coding
hypo1045	chr11:91250002-91260000	Intergenic	NR_031663	100302228	NR_031663	ENSG00000221586	MIR1261	microRNA 1261	ncRNA
hypo1046	chr6:124410002-124420000	intron (NM_153355, intron 1 of 5)	NM_001300740	154215	NM_153355	ENSG00000188580	NKAIN2	Sodium/potassium transporting ATPase interacting 2	protein-coding
hypo1047	chr2:2250002-2260000	intron (NM_001329845, intron 2 of 24)	NR_024468	730811	NR_024468	ENSG00000225619	MYT1L-AS1	MYT1L antisense RNA 1	ncRNA
hypo1048	chr19:23070002-23080000	Intergenic	NM_001080409	7652	NM_001080409	ENSG00000213973	ZNF99	zinc finger protein 99	protein-coding
hypo1049	chr12:121090002-121100000	intron (NM_031205, intron 2 of 6)	NM_004276	9478	NM_004276	ENSG00000157782	CABP1	calcium binding protein 1	protein-coding
hypo105	chr11:530002-540000	intron (NM_176795, intron 1 of 5)	NM_001318054	3265	NM_005343	ENSG00000174775	HRAS	HRas proto-oncogene, GTPase	protein-coding
hypo1050	chr10:95390002-95400000	intron (NM_006204, intron 9 of 21)	NM_006204	5146	NM_006204	ENSG00000095464	PDE6C	phosphodiesterase 6C	protein-coding
hypo1051	chr16:47260002-47270000	intron (NM_030790, intron 13 of 17)	NR_110904	101927102	NR_110903		ITFG1-AS1	ITFG1 antisense RNA 1	ncRNA
hypo1052	chr2:174700002-174710000	Intergenic	NM_001017371	6670	NM_003111	ENSG00000172845	SP3	Sp3 transcription factor	protein-coding
hypo1053	chr11:107720002-107730000	intron (NM_017515, intron 1 of 7)	NM_017515	54733	NM_017515	ENSG00000110660	SLC35F2	solute carrier family 35 member F2	protein-coding
hypo1054	chr11:73910002-73920000	intron (NM_016147, intron 2 of 13)	NM_001271593	51400	NM_016147	ENSG00000214517	PPME1	protein phosphatase methylesterase 1	protein-coding
hypo1055	chr16:22130002-22140000	exon (NM_173615, exon 16 of 34)	NM_173615	146177	NM_173615	ENSG00000175267	VWA3A	von Willebrand factor A domain containing 3A	protein-coding
hypo1056	chr18:61820002-61830000	intron (NR_033881, intron 2 of 9)	NR_027245	221241	NM_152728	ENSG00000179676	LINC00305	long intergenic non-protein coding RNA 305	ncRNA
hypo1057	chr5:125600002-125610000	Intergenic	NR_105040	101927488	NR_105039		LOC101927488	uncharacterized LOC101927488	ncRNA
hypo1058	chr14:59910002-59920000	Intergenic	NM_022571	64582	NM_022571	ENSG00000181619	GPR135	G protein-coupled receptor 135	protein-coding
hypo1059	chr8:19380002-19390000	intron (NR_024040, intron 2 of 9)	NM_001130518	55790	NM_018371	ENSG00000147408	CSGALNACT1	chondroitin sulfate N-acetylgalactosaminyltransferase 1	protein-coding
hypo106	chr7:128520002-128530000	intron (NM_001135914, intron 27 of 37)	NM_001195150	100130705	NM_001195150	ENSG00000272899	LOC100130705	uncharacterized LOC100130705	protein-coding
hypo1060	chr2:134530002-134540000	Intergenic	NM_207363	344148	NM_207363	ENSG00000176771	NCKAP5	NCK associated protein 5	protein-coding
hypo1061	chr12:112590002-112600000	Intergenic	NR_106921	102465519	NR_106921	ENSG00000173064	MIR6861	microRNA 6861	ncRNA
hypo1062	chr12:58930002-58940000	Intergenic	NR_126341	100506869	NR_126341	ENSG00000258231	LOC100506869	uncharacterized LOC100506869	ncRNA
hypo1063	chr2:21520002-21530000	Intergenic	NM_001306137	100129278	NM_001306137	ENSG00000218819	TDRD15	tudor domain containing 15	protein-coding
hypo1064	chr6:63710002-63720000	Intergenic	NM_016571	51557	NM_016571	ENSG00000146166	LGSN	lengsin, lens protein with glutamine synthetase domain	protein-coding
hypo1065	chr3:159770002-159780000	intron (NR_108088, intron 3 of 9)	NR_104132	730109	NR_104132		LINC01100	long intergenic non-protein coding RNA 1100	ncRNA
hypo1066	chr1:240300002-240310000	intron (NM_001305424, intron 2 of 18)	NM_001305424	56776	NM_020066	ENSG00000155816	FMN2	formin 2	protein-coding
hypo1067	chr16:78430002-78440000	intron (NM_001291997, intron 5 of 7)	NM_016373	51741	NM_016373	ENSG00000186153	WWOX	WW domain containing oxidoreductase	protein-coding
hypo1068	chr5:39150002-39160000	intron (NM_001465, intron 2 of 18)	NM_001465	2533	NM_001465	ENSG00000082074	FYB	FYN binding protein	protein-coding
hypo1069	chr11:132320002-132330000	intron (NM_001319104, intron 3 of 6)	NR_046820	100874281	NR_046820		NTM-IT	NTM intronic transcript	ncRNA
hypo107	chrX:114950002-114960000	Intergenic	NM_001282338	5358	NM_005032	ENSG00000102024	PLS3	plastin 3	protein-coding
hypo1070	chr11:49290002-49300000	Intergenic	NM_004476	2346	NM_004476	ENSG00000086205	FOLH1	folate hydrolase 1	protein-coding
hypo1071	chr9:115810002-115820000	intron (NM_001282515, intron 1 of 3)	NM_003408	7539	NM_003408	ENSG00000136866	ZFP37	ZFP37 zinc finger protein	protein-coding
hypo1072	chr12:125420002-125430000	Intergenic	NR_049820	100847004	NR_049820	ENSG00000265345	MIR5188	microRNA 5188	ncRNA
hypo1073	chr10:2890002-2900000	Intergenic	NM_001323068	5214	NM_002627	ENSG00000067057	PFKP	phosphofructokinase, platelet	protein-coding
hypo1074	chr1:180850002-180860000	non-coding (NR_137330, exon 13 of 13)	NM_020950	57710	NM_020950	ENSG00000135835	KIAA1614	KIAA1614	protein-coding
hypo1075	chr1:191950002-191960000	Intergenic	NM_130782	64407	NM_130782	ENSG00000150681	RGS18	regulator of G-protein signaling 18	protein-coding
hypo1076	chr7:35420002-35430000	Intergenic	NR_038864	401324	NR_038864		LOC401324	uncharacterized LOC401324	ncRNA
hypo1077	chr9:124750002-124760000	intron (NM_194252, intron 3 of 3)	NM_001139442	158135	NM_194252	ENSG00000175764	TTLL11	tubulin tyrosine ligase like 11	protein-coding
hypo1078	chr13:19690002-19700000	Intergenic	NM_006001	7278	NM_006001	ENSG00000198033	TUBA3C	tubulin alpha 3c	protein-coding
hypo1079	chr6:10340002-10350000	Intergenic	NR_033910	100130275	NR_033910		TFAP2A-AS1	TFAP2A antisense RNA 1	ncRNA
hypo108	chr12:108260002-108270000	Intergenic	NR_037629	728739	NR_037629		LOC728739	programmed cell death 2 pseudogene	pseudo
hypo1080	chr17:13560002-13570000	Intergenic	NM_006042	9955	NM_006042	ENSG00000153976	HS3ST3A1	heparan sulfate-glucosamine 3-sulfotransferase 3A1	protein-coding
hypo1081	chr19:59050002-59060000	promoter-TSS (NM_005762)	NM_005762	10155	NM_005762	ENSG00000130726	TRIM28	tripartite motif containing 28	protein-coding
hypo1082	chr2:75270002-75280000	3' UTR (NM_001058, exon 5 of 5)	NR_049796	100846995	NR_049796	ENSG00000263909	MIR5000	microRNA 5000	ncRNA
hypo1083	chr16:23940002-23950000	intron (NM_212535, intron 2 of 16)	NM_212535	5579	NM_002738	ENSG00000166501	PRKCB	protein kinase C beta	protein-coding
hypo1084	chr7:107610002-107620000	intron (NM_002291, intron 12 of 33)	NM_002291	3912	NM_002291	ENSG00000091136	LAMB1	laminin subunit beta 1	protein-coding
hypo1085	chrX:3450002-3460000	Intergenic	NR_046643	100873944	NR_046643	ENSG00000236188	PRKX-AS1	PRKX antisense RNA 1	ncRNA
hypo1086	chr7:111550002-111560000	intron (NM_014705, intron 13 of 51)	NR_103806	100506413	NR_103806	ENSG00000225572	DOCK4-AS1	DOCK4 antisense RNA 1	ncRNA
hypo1087	chr10:48350002-48360000	promoter-TSS (NM_153034)	NM_001346935	118738	NM_153034	ENSG00000265763	ZNF488	zinc finger protein 488	protein-coding
hypo1088	chr12:26000002-26010000	Intergenic	NR_036188	100422897	NR_036188	ENSG00000283603	MIR4302	microRNA 4302	ncRNA
hypo1089	chr7:106580002-106590000	Intergenic	NM_002649	5294	NM_002649	ENSG00000105851	PIK3CG	phosphatidylinositol-4,5-bisphosphate 3-kinase catalytic subunit gamma	protein-coding
hypo109	chr4:118520002-118530000	intron (NR_125757, intron 2 of 3)	NR_125757	103689918	NR_125757		LINC01378	long intergenic non-protein coding RNA 1378	ncRNA
hypo1090	chr19:5810002-5820000	Intergenic	NM_004558	4902	NM_004558	ENSG00000171119	NRTN	neurturin	protein-coding
hypo1091	chr1:27710002-27720000	Intergenic	NM_005281	2827	NM_005281	ENSG00000181773	GPR3	G protein-coupled receptor 3	protein-coding
hypo1092	chr2:171830002-171840000	Intergenic	NM_015530	26003	NM_015530	ENSG00000115806	GORASP2	golgi reassembly stacking protein 2	protein-coding
hypo1093	chr7:128150002-128160000	Intergenic	NM_018396	55798	NM_018396	ENSG00000165055	METTL2B	methyltransferase like 2B	protein-coding
hypo1094	chr12:18790002-18800000	intron (NM_004570, intron 31 of 31)	NM_001330769	89869	NM_033123	ENSG00000139151	PLCZ1	phospholipase C zeta 1	protein-coding
hypo1095	chr10:78600002-78610000	Intergenic	NR_120655	101929328	NR_120655	ENSG00000236467	KCNMA1-AS1	KCNMA1 antisense RNA 1	ncRNA
hypo1096	chr7:40240002-40250000	intron (NM_024728, intron 6 of 14)	NM_024728	79783	NM_024728	ENSG00000175600	SUGCT	succinyl-CoA:glutarate-CoA transferase	protein-coding
hypo1097	chr2:40480002-40490000	intron (NM_021097, intron 1 of 9)	NM_001112801	6546	NM_021097	ENSG00000183023	SLC8A1	solute carrier family 8 member A1	protein-coding
hypo1098	chr11:129430002-129440000	Intergenic	NR_120582	101929557	NR_120582	ENSG00000281097	LINC01395	long intergenic non-protein coding RNA 1395	ncRNA
hypo1099	chr6:95260002-95270000	Intergenic	NR_047502	101927288	NR_047502	ENSG00000261366	MANEA-AS1	MANEA antisense RNA 1 (head to head)	ncRNA
hypo11	chr10:126480002-126490000	Intergenic	NM_212554	399818	NM_212554	ENSG00000203791	METTL10	methyltransferase like 10	protein-coding
hypo110	chr11:100680002-100690000	intron (NM_152432, intron 3 of 23)	NR_133571	100128386	NR_133571	ENSG00000248027	LOC100128386	uncharacterized LOC100128386	ncRNA
hypo1100	chr2:208190002-208200000	Intergenic	NR_031633	100302130	NR_031633	ENSG00000221628	MIR1302-4	microRNA 1302-4	ncRNA
hypo1101	chr13:30060002-30070000	intron (NM_001033602, intron 9 of 13)	NR_046378	100874107	NR_046378		MTUS2-AS1	MTUS2 antisense RNA 1	ncRNA
hypo1102	chr14:63630002-63640000	Intergenic	NM_020663	57381	NM_020663	ENSG00000126785	RHOJ	ras homolog family member J	protein-coding
hypo1103	chr2:174230002-174240000	Intergenic	NM_145810	83879	NM_031942	ENSG00000144354	CDCA7	cell division cycle associated 7	protein-coding
hypo1104	chr14:87700002-87710000	Intergenic	NR_038445	283585	NR_038445	ENSG00000258804	LINC01148	long intergenic non-protein coding RNA 1148	ncRNA
hypo1105	chr11:70610002-70620000	intron (NM_012309, intron 11 of 22)	NR_073536	220070	NM_145308	ENSG00000171671	SHANK2-AS3	SHANK2 antisense RNA 3	ncRNA
hypo1106	chr20:13880002-13890000	intron (NR_073207, intron 5 of 18)	NR_073206	80343	NM_025229	ENSG00000101251	SEL1L2	SEL1L2 ERAD E3 ligase adaptor subunit	protein-coding
hypo1107	chr18:43350002-43360000	Intergenic	NM_001146037	6563	NM_015865	ENSG00000141469	SLC14A1	solute carrier family 14 member 1 (Kidd blood group)	protein-coding
hypo1108	chr14:101370002-101380000	Intergenic	NR_029863	442915	NR_029863	ENSG00000199005	MIR370	microRNA 370	ncRNA
hypo1109	chrX:53780002-53790000	Intergenic	NM_031407	10075	NM_031407	ENSG00000086758	HUWE1	HECT, UBA and WWE domain containing 1, E3 ubiquitin protein ligase	protein-coding
hypo111	chr8:122250002-122260000	Intergenic	NR_002835	594842	NR_002835		HAS2-AS1	HAS2 antisense RNA 1	ncRNA
hypo1110	chr5:168680002-168690000	intron (NM_003062, intron 1 of 35)	NR_030311	693170	NR_030311	ENSG00000207619	MIR585	microRNA 585	ncRNA
hypo1111	chr3:40750002-40760000	Intergenic	NM_001287245	285268	NM_198484	ENSG00000172888	ZNF621	zinc finger protein 621	protein-coding
hypo1112	chr4:140630002-140640000	intron (NM_001204366, intron 5 of 5)	NM_002413	4258	NM_002413	ENSG00000085871	MGST2	microsomal glutathione S-transferase 2	protein-coding
hypo1113	chr10:27470002-27480000	intron (NM_001172303, intron 11 of 11)	NM_001320756	84930	NM_032844	ENSG00000120539	MASTL	microtubule associated serine/threonine kinase like	protein-coding
hypo1114	chr1:94040002-94050000	intron (NM_001261408, intron 9 of 13)	NM_001308251	8412	NM_003567	ENSG00000137936	BCAR3	breast cancer anti-estrogen resistance 3	protein-coding
hypo1115	chr10:97370002-97380000	intron (NM_001017423, intron 13 of 17)	NM_001323414	5832	NM_002860	ENSG00000059573	ALDH18A1	aldehyde dehydrogenase 18 family member A1	protein-coding
hypo1116	chr12:44840002-44850000	Intergenic	NM_001145109	4753	NM_006159	ENSG00000184613	NELL2	neural EGFL like 2	protein-coding
hypo1117	chr10:103680002-103690000	intron (NM_024541, intron 23 of 25)	NM_173195	30819	NM_014591	ENSG00000120049	KCNIP2	potassium voltage-gated channel interacting protein 2	protein-coding
hypo1118	chr3:127920002-127930000	intron (NM_021937, intron 1 of 6)	NM_001319086	8607	NM_003707	ENSG00000175792	RUVBL1	RuvB like AAA ATPase 1	protein-coding
hypo1119	chr15:66290002-66300000	intron (NM_032445, intron 5 of 22)	NR_036196	100422905	NR_036196	ENSG00000263512	MIR4311	microRNA 4311	ncRNA
hypo112	chr16:9230002-9240000	Intergenic	NM_014117	29035	NM_014117	ENSG00000182831	C16orf72	chromosome 16 open reading frame 72	protein-coding
hypo1120	chr2:220720002-220730000	Intergenic	NR_036228	100422959	NR_036228	ENSG00000266518	MIR4268	microRNA 4268	ncRNA
hypo1121	chr17:76540002-76550000	intron (NM_173628, intron 16 of 80)	NM_173628	8632	NM_003727	ENSG00000187775	DNAH17	dynein axonemal heavy chain 17	protein-coding
hypo1122	chr3:143500002-143510000	intron (NM_173653, intron 4 of 15)	NM_173653	285195	NM_173653	ENSG00000181804	SLC9A9	solute carrier family 9 member A9	protein-coding
hypo1123	chr3:125580002-125590000	intron (NR_125396, intron 2 of 2)	NR_125395	101927056	NR_125395	ENSG00000241288	LOC101927056	uncharacterized LOC101927056	ncRNA
hypo1124	chr19:10830002-10840000	intron (NM_001005360, intron 1 of 20)	NR_030368	693223	NR_030368	ENSG00000207972	MIR638	microRNA 638	ncRNA
hypo1125	chr11:7390002-7400000	intron (NM_175733, intron 3 of 6)	NR_103855	100506258	NR_103855	ENSG00000251364	LOC100506258	uncharacterized LOC100506258	ncRNA
hypo1126	chr7:105310002-105320000	intron (NM_020725, intron 3 of 11)	NM_138495	222255	NM_020725	ENSG00000146776	ATXN7L1	ataxin 7 like 1	protein-coding
hypo1127	chr6:144060002-144070000	intron (NM_001100165, intron 2 of 11)	NM_001100164	9749	NM_014721	ENSG00000112419	PHACTR2	phosphatase and actin regulator 2	protein-coding
hypo1128	chr19:23280002-23290000	Intergenic	NM_001277403	100129543	NM_001277403	ENSG00000183850	ZNF730	zinc finger protein 730	protein-coding
hypo1129	chr7:101500002-101510000	intron (NM_181552, intron 1 of 23)	NM_181552	1523	NM_001913	ENSG00000257923	CUX1	cut like homeobox 1	protein-coding
hypo113	chr9:72020002-72030000	Intergenic	NM_004816	9413	NM_004816	ENSG00000135063	FAM189A2	family with sequence similarity 189 member A2	protein-coding
hypo1130	chr1:150180002-150190000	Intergenic	NM_001136479	81611	NM_030920	ENSG00000143401	ANP32E	acidic nuclear phosphoprotein 32 family member E	protein-coding
hypo1131	chr17:57570002-57580000	intron (NR_110813, intron 2 of 2)	NR_110813	101927728	NR_110813	ENSG00000265313	LINC01476	long intergenic non-protein coding RNA 1476	ncRNA
hypo1132	chr18:1590002-1600000	Intergenic	NR_023926	56651	NM_031416		LINC00470	long intergenic non-protein coding RNA 470	ncRNA
hypo1133	chr12:64700002-64710000	intron (NM_001099676, intron 3 of 10)	NM_001170633	115749	NM_001099676	ENSG00000185306	C12orf56	chromosome 12 open reading frame 56	protein-coding
hypo1134	chr1:246160002-246170000	intron (NM_001167740, intron 5 of 11)	NM_022743	64754	NM_022743	ENSG00000185420	SMYD3	SET and MYND domain containing 3	protein-coding
hypo1135	chr9:94970002-94980000	intron (NM_002161, intron 33 of 33)	NR_027341	158314	NR_027341		LINC00475	long intergenic non-protein coding RNA 475	ncRNA
hypo1136	chr3:36950002-36960000	intron (NM_001329998, intron 1 of 23)	NM_001329998	9881	NM_014831	ENSG00000168016	TRANK1	tetratricopeptide repeat and ankyrin repeat containing 1	protein-coding
hypo1137	chr15:22370002-22380000	intron (NR_110480, intron 7 of 8)	NM_001004719	390538	NM_001004719	ENSG00000274102	OR4M2	olfactory receptor family 4 subfamily M member 2	protein-coding
hypo1138	chr11:5620002-5630000	intron (NM_001003819, intron 2 of 13)	NM_001003819	445372	NM_001003819	ENSG00000258588	TRIM6-TRIM34	TRIM6-TRIM34 readthrough	protein-coding
hypo1139	chr2:4990002-5000000	Intergenic	NR_034134	727982	NR_034134	ENSG00000231532	LINC01249	long intergenic non-protein coding RNA 1249	ncRNA
hypo114	chr18:21420002-21430000	exon (NM_198129, exon 30 of 75)	NM_000227	3909	NM_000227	ENSG00000053747	LAMA3	laminin subunit alpha 3	protein-coding
hypo1140	chr11:107270002-107280000	intron (NM_152434, intron 10 of 17)	NM_152434	143884	NM_152434	ENSG00000152404	CWF19L2	CWF19-like 2, cell cycle control (S. pombe)	protein-coding
hypo1141	chrX:100360002-100370000	intron (NM_006733, intron 5 of 20)	NM_001318523	2491	NM_006733	ENSG00000102384	CENPI	centromere protein I	protein-coding
hypo1142	chr10:19870002-19880000	intron (NM_001142308, intron 33 of 39)	NR_120646	101928834	NR_120646	ENSG00000233968	LOC101928834	uncharacterized LOC101928834	ncRNA
hypo1143	chr18:12180002-12190000	Intergenic	NR_049896	497259	NR_049896		C18orf61	uncharacterized LOC497259	ncRNA
hypo1144	chr9:84800002-84810000	Intergenic	NM_001001670	389763	NM_001001670	ENSG00000214929	SPATA31D1	SPATA31 subfamily D member 1	protein-coding
hypo1145	chr16:77870002-77880000	intron (NM_020927, intron 3 of 8)	NM_020927	57687	NM_020927	ENSG00000171724	VAT1L	vesicle amine transport 1 like	protein-coding
hypo1146	chr1:155750002-155760000	intron (NM_001282861, intron 13 of 20)	NR_132767	106633816	NR_132767		SCARNA26B	small Cajal body-specific RNA 26B	ncRNA
hypo1147	chr10:16760002-16770000	intron (NM_152724, intron 6 of 7)	NM_152724	6251	NM_012425	ENSG00000148484	RSU1	Ras suppressor protein 1	protein-coding
hypo1148	chr4:170690002-170700000	Intergenic	NM_017867	54969	NM_017867	ENSG00000056050	HPF1	histone PARylation factor 1	protein-coding
hypo1149	chr6:120780002-120790000	Intergenic	NR_036098	100422951	NR_036098	ENSG00000265725	MIR3144	microRNA 3144	ncRNA
hypo115	chr11:133760002-133770000	Intergenic	NR_039846	100616119	NR_039846	ENSG00000280237	MIR4697	microRNA 4697	ncRNA
hypo1150	chr20:5160002-5170000	intron (NM_003818, intron 7 of 12)	NM_003818	8760	NM_003818	ENSG00000101290	CDS2	CDP-diacylglycerol synthase 2	protein-coding
hypo1151	chr14:87600002-87610000	Intergenic	NR_038445	283585	NR_038445	ENSG00000258804	LINC01148	long intergenic non-protein coding RNA 1148	ncRNA
hypo1152	chr16:52460002-52470000	Intergenic	NM_001080430	27324	NM_001080430	ENSG00000103460	TOX3	TOX high mobility group box family member 3	protein-coding
hypo1153	chr5:10580002-10590000	intron (NM_001164440, intron 1 of 3)	NM_001164440	651746	NM_001164440	ENSG00000164236	ANKRD33B	ankyrin repeat domain 33B	protein-coding
hypo1154	chr14:38290002-38300000	intron (NM_001310135, intron 29 of 32)	NR_135286	400208	NR_135286	ENSG00000259091	LINC00517	long intergenic non-protein coding RNA 517	ncRNA
hypo1155	chr7:123400002-123410000	Intergenic	NM_003941	8976	NM_003941	ENSG00000106299	WASL	Wiskott-Aldrich syndrome like	protein-coding
hypo1156	chr7:100630002-100640000	exon (NM_001164462, exon 2 of 12)	NM_001164462	10071	NM_001164462	ENSG00000205277	MUC12	mucin 12, cell surface associated	protein-coding
hypo1157	chr2:198550002-198560000	Intergenic	NM_144629	130132	NM_144629	ENSG00000162944	RFTN2	raftlin family member 2	protein-coding
hypo1158	chr20:13660002-13670000	Intergenic	NM_001323603	55617	NM_017714	ENSG00000089123	TASP1	taspase 1	protein-coding
hypo1159	chr3:169420002-169430000	Intergenic	NM_001205194	2122	NM_004991	ENSG00000085276	MECOM	MDS1 and EVI1 complex locus	protein-coding
hypo116	chr19:30370002-30380000	Intergenic	NM_001252641	8725	NM_003796	ENSG00000105176	URI1	URI1, prefoldin like chaperone	protein-coding
hypo1160	chr11:54890002-54900000	Intergenic	NM_024114	79097	NM_024114	ENSG00000150244	TRIM48	tripartite motif containing 48	protein-coding
hypo1161	chrX:16430002-16440000	Intergenic	NR_039762	100616428	NR_039762	ENSG00000265144	MIR548AM	microRNA 548am	ncRNA
hypo1162	chr19:6520002-6530000	Intergenic	NM_003811	8744	NM_003811	ENSG00000125657	TNFSF9	tumor necrosis factor superfamily member 9	protein-coding
hypo1163	chr6:160700002-160710000	Intergenic	NM_003058	6582	NM_003058	ENSG00000112499	SLC22A2	solute carrier family 22 member 2	protein-coding
hypo1164	chr4:12450002-12460000	Intergenic	NR_125910	101929019	NR_125910	ENSG00000251210	LOC101929019	uncharacterized LOC101929019	ncRNA
hypo1165	chr9:21040002-21050000	Intergenic	NM_001010915	401494	NM_001010915	ENSG00000188921	HACD4	3-hydroxyacyl-CoA dehydratase 4	protein-coding
hypo1166	chr12:76510002-76520000	Intergenic	NM_001330232	4673	NM_004537	ENSG00000187109	NAP1L1	nucleosome assembly protein 1 like 1	protein-coding
hypo1167	chr13:41230002-41240000	intron (NM_002015, intron 1 of 2)	NM_002015	2308	NM_002015	ENSG00000150907	FOXO1	forkhead box O1	protein-coding
hypo1168	chr17:12700002-12710000	intron (NM_001321166, intron 1 of 19)	NR_104607	100128006	NR_104607	ENSG00000265489	LOC100128006	uncharacterized LOC100128006	ncRNA
hypo1169	chrX:99200002-99210000	Intergenic	NR_024608	442459	NM_001127438		XRCC6P5	X-ray repair cross complementing 6 pseudogene 5	pseudo
hypo117	chr12:9390002-9400000	non-coding (NR_036466, exon 2 of 2)	NR_137431	100499405	NR_036466	ENSG00000237248	LINC00987	long intergenic non-protein coding RNA 987	ncRNA
hypo1170	chr16:9820002-9830000	Intergenic	NR_126349	104266959	NR_126349	ENSG00000261075	LINC01195	long intergenic non-protein coding RNA 1195	ncRNA
hypo1171	chr16:53050002-53060000	Intergenic	NR_136518	105371267	NR_136518	ENSG00000277639	LOC105371267	p53-regulated lncRNA 1	ncRNA
hypo1172	chr6:105520002-105530000	intron (NM_001004317, intron 3 of 3)	NM_147147	11149	NM_007073	ENSG00000112276	BVES	blood vessel epicardial substance	protein-coding
hypo1173	chr3:193650002-193660000	Intergenic	NR_027764	100128023	NR_027764		DPPA2P3	developmental pluripotency associated 2 pseudogene 3	pseudo
hypo1174	chr1:5080002-5090000	Intergenic	NM_001042478	55966	NM_018836	ENSG00000196581	AJAP1	adherens junctions associated protein 1	protein-coding
hypo1175	chrX:76290002-76300000	Intergenic	NR_110402	101928469	NR_110400	ENSG00000280870	MIR325HG	MIR325 host gene	ncRNA
hypo1176	chr10:103700002-103710000	intron (NM_024541, intron 22 of 25)	NM_173195	30819	NM_014591	ENSG00000120049	KCNIP2	potassium voltage-gated channel interacting protein 2	protein-coding
hypo1177	chr7:33620002-33630000	intron (NM_001033604, intron 20 of 21)	NM_133468	168667	NM_133468	ENSG00000164619	BMPER	BMP binding endothelial regulator	protein-coding
hypo1178	chr8:75470002-75480000	Intergenic	NR_049871	100847091	NR_049871	ENSG00000283505	MIR5681B	microRNA 5681b	ncRNA
hypo1179	chr6:28770002-28780000	Intergenic	NR_033379	401242	NR_033379	ENSG00000225595	LINC01623	long intergenic non-protein coding RNA 1623	ncRNA
hypo118	chr2:170140002-170150000	intron (NM_004525, intron 9 of 78)	NM_004525	4036	NM_004525	ENSG00000081479	LRP2	LDL receptor related protein 2	protein-coding
hypo1180	chr5:19760002-19770000	intron (NM_001291956, intron 5 of 14)	NM_001291957	1016	NM_004934	ENSG00000145526	CDH18	cadherin 18	protein-coding
hypo1181	chr1:173380002-173390000	intron (NR_037845, intron 2 of 2)	NR_125960	101928673	NR_125960	ENSG00000203739	LOC101928673	uncharacterized LOC101928673	ncRNA
hypo1182	chr10:111680002-111690000	Intergenic	NM_001324134	7511	NM_020383	ENSG00000108039	XPNPEP1	X-prolyl aminopeptidase 1	protein-coding
hypo1183	chr4:143190002-143200000	intron (NM_003866, intron 10 of 26)	NM_001331040	8821	NM_003866	ENSG00000109452	INPP4B	inositol polyphosphate-4-phosphatase type II B	protein-coding
hypo1184	chr1:16890002-16900000	intron (NM_017940, intron 23 of 28)	NR_037446	100500876	NR_037446	ENSG00000263811	MIR3675	microRNA 3675	ncRNA
hypo1185	chr6:108630002-108640000	intron (NR_136553, intron 1 of 8)	NM_001323005	246269	NM_145315	ENSG00000135537	LACE1	lactation elevated 1	protein-coding
hypo1186	chr6:24300002-24310000	intron (NM_016356, intron 2 of 9)	NM_181337	353219	NM_181337	ENSG00000146049	KAAG1	kidney associated antigen 1	protein-coding
hypo1187	chr2:143660002-143670000	intron (NM_001199241, intron 3 of 14)	NM_003937	8942	NM_003937	ENSG00000115919	KYNU	kynureninase	protein-coding
hypo1188	chr8:116220002-116230000	Intergenic	NM_001282902	7227	NM_014112	ENSG00000104447	TRPS1	transcriptional repressor GATA binding 1	protein-coding
hypo1189	chr3:50250002-50260000	intron (NM_006841, intron 9 of 15)	NM_001282619	2771	NM_002070	ENSG00000114353	GNAI2	G protein subunit alpha i2	protein-coding
hypo119	chr20:250002-260000	intron (NM_153269, intron 10 of 10)	NM_080571	140680	NM_080571	ENSG00000196476	C20orf96	chromosome 20 open reading frame 96	protein-coding
hypo1190	chr19:43480002-43490000	Intergenic	NM_001206650	5676	NM_002783	ENSG00000221878	PSG7	pregnancy specific beta-1-glycoprotein 7 (gene/pseudogene)	protein-coding
hypo1191	chr2:28760002-28770000	intron (NM_153021, intron 13 of 57)	NR_138141	151056	NM_153021	ENSG00000163803	PLB1	phospholipase B1	protein-coding
hypo1192	chr10:25720002-25730000	intron (NM_020752, intron 4 of 10)	NR_108069	101929052	NR_108067	ENSG00000280809	LINC00836	long intergenic non-protein coding RNA 836	ncRNA
hypo1193	chrX:20030002-20040000	TTS (NR_037414)	NR_037414	100500809	NR_037414	ENSG00000264566	MIR23C	microRNA 23c	ncRNA
hypo1194	chr12:68930002-68940000	Intergenic	NM_001010942	5908	NM_015646	ENSG00000127314	RAP1B	RAP1B, member of RAS oncogene family	protein-coding
hypo1195	chr18:90002-100000	Intergenic	NR_033770	727758	NR_033770	ENSG00000263006	ROCK1P1	Rho associated coiled-coil containing protein kinase 1 pseudogene 1	pseudo
hypo1196	chr11:7280002-7290000	intron (NM_175733, intron 1 of 6)	NM_175733	143425	NM_175733	ENSG00000170743	SYT9	synaptotagmin 9	protein-coding
hypo1197	chr4:178650002-178660000	intron (NR_028342, intron 2 of 5)	NR_028342	285501	NM_001085490	ENSG00000231171	LINC01098	long intergenic non-protein coding RNA 1098	ncRNA
hypo1198	chr7:117430002-117440000	intron (NM_033427, intron 3 of 22)	NM_033427	83992	NM_033427	ENSG00000077063	CTTNBP2	cortactin binding protein 2	protein-coding
hypo1199	chr12:73780002-73790000	Intergenic	NR_110130	101928137	NR_110130	ENSG00000258123	LOC101928137	uncharacterized LOC101928137	ncRNA
hypo12	chr16:87030002-87040000	Intergenic	NR_126008	440390	NR_126008	ENSG00000232190	LOC440390	uncharacterized LOC440390	ncRNA
hypo120	chr8:93450002-93460000	Intergenic	NR_125827	102724710	NR_125827	ENSG00000253634	LOC102724710	uncharacterized LOC102724710	ncRNA
hypo1200	chr3:169150002-169160000	intron (NM_004991, intron 1 of 16)	NR_134932	105374205	NR_134932	ENSG00000241479	LOC105374205	uncharacterized LOC105374205	ncRNA
hypo1201	chr9:95710002-95720000	intron (NM_001083536, intron 1 of 17)	NM_001083536	89846	NM_033086	ENSG00000127084	FGD3	FYVE, RhoGEF and PH domain containing 3	protein-coding
hypo1202	chr10:113930002-113940000	intron (NM_001244949, intron 6 of 21)	NM_001244949	57678	NM_020918	ENSG00000119927	GPAM	glycerol-3-phosphate acyltransferase, mitochondrial	protein-coding
hypo1203	chr2:161920002-161930000	Intergenic	NM_004180	10010	NM_004180	ENSG00000136560	TANK	TRAF family member associated NFKB activator	protein-coding
hypo1204	chr8:117370002-117380000	Intergenic	NR_046215	100859921	NR_046215	ENSG00000249917	LINC00536	long intergenic non-protein coding RNA 536	ncRNA
hypo1205	chr8:85560002-85570000	intron (NM_001100391, intron 2 of 8)	NM_001287244	138046	NM_173848	ENSG00000184672	RALYL	RALY RNA binding protein-like	protein-coding
hypo1206	chrX:35230002-35240000	Intergenic	NM_152631	170062	NM_152631	ENSG00000189132	FAM47B	family with sequence similarity 47 member B	protein-coding
hypo1207	chr7:2890002-2900000	Intergenic	NM_001293092	2768	NM_007353	ENSG00000146535	GNA12	G protein subunit alpha 12	protein-coding
hypo1208	chr9:6610002-6620000	intron (NM_000170, intron 3 of 24)	NM_000170	2731	NM_000170	ENSG00000178445	GLDC	glycine decarboxylase	protein-coding
hypo1209	chr4:75710002-75720000	intron (NM_001729, intron 1 of 5)	NM_001729	685	NM_001729	ENSG00000174808	BTC	betacellulin	protein-coding
hypo121	chr19:46840002-46850000	3' UTR (NM_152795, exon 15 of 15)	NM_006247	5536	NM_006247	ENSG00000011485	PPP5C	protein phosphatase 5 catalytic subunit	protein-coding
hypo1210	chr9:122020002-122030000	intron (NM_014618, intron 2 of 7)	NM_014618	1620	NM_014618	ENSG00000078725	BRINP1	BMP/retinoic acid inducible neural specific 1	protein-coding
hypo1211	chr5:121910002-121920000	Intergenic	NR_134281	101927357	NR_134281		LOC101927357	uncharacterized LOC101927357	ncRNA
hypo1212	chr2:33720002-33730000	intron (NM_001139488, intron 1 of 17)	NM_015376	25780	NM_015376	ENSG00000152689	RASGRP3	RAS guanyl releasing protein 3	protein-coding
hypo1213	chrX:154520002-154530000	intron (NM_001289, intron 3 of 5)	NM_171998	116442	NM_171998	ENSG00000155961	RAB39B	RAB39B, member RAS oncogene family	protein-coding
hypo1214	chr4:172590002-172600000	Intergenic	NM_001034845	442117	NM_001034845	ENSG00000174473	GALNTL6	polypeptide N-acetylgalactosaminyltransferase-like 6	protein-coding
hypo1215	chr1:248200002-248210000	intron (NM_001304535, intron 1 of 1)	NM_001004686	26246	NM_001004686	ENSG00000203663	OR2L2	olfactory receptor family 2 subfamily L member 2	protein-coding
hypo1216	chr4:57370002-57380000	intron (NM_206919, intron 1 of 3)	NM_206919	132946	NM_206919	ENSG00000196503	ARL9	ADP ribosylation factor like GTPase 9	protein-coding
hypo1217	chr16:3800002-3810000	intron (NM_001079846, intron 18 of 29)	NM_001272049	10131	NM_016292	ENSG00000126602	TRAP1	TNF receptor associated protein 1	protein-coding
hypo1218	chr6:30870002-30880000	promoter-TSS (NM_001517)	NM_001517	2968	NM_001517	ENSG00000213780	GTF2H4	general transcription factor IIH subunit 4	protein-coding
hypo1219	chr21:33310002-33320000	intron (NM_014586, intron 3 of 10)	NM_014586	30811	NM_014586	ENSG00000142149	HUNK	hormonally up-regulated Neu-associated kinase	protein-coding
hypo122	chr1:6900002-6910000	intron (NM_015215, intron 3 of 22)	NM_015215	23261	NM_015215	ENSG00000171735	CAMTA1	calmodulin binding transcription activator 1	protein-coding
hypo1220	chr5:34800002-34810000	intron (NM_001145520, intron 5 of 17)	NR_106988	102465753	NR_106988	ENSG00000280494	MIR7641-2	microRNA 7641-2	ncRNA
hypo1221	chr3:47610002-47620000	intron (NM_006574, intron 2 of 4)	NM_006574	10675	NM_006574	ENSG00000114646	CSPG5	chondroitin sulfate proteoglycan 5	protein-coding
hypo1222	chr1:211090002-211100000	intron (NM_002238, intron 6 of 10)	NM_002238	3756	NM_002238	ENSG00000143473	KCNH1	potassium voltage-gated channel subfamily H member 1	protein-coding
hypo1223	chr13:56230002-56240000	Intergenic	NR_049804	100846996	NR_049804	ENSG00000264387	MIR5007	microRNA 5007	ncRNA
hypo1224	chr7:157880002-157890000	intron (NM_130843, intron 9 of 21)	NR_038966	100506585	NR_038966	ENSG00000233038	LOC100506585	uncharacterized LOC100506585	ncRNA
hypo1225	chr4:113780002-113790000	intron (NM_001127493, intron 1 of 46)	NM_001127493	287	NM_001148	ENSG00000145362	ANK2	ankyrin 2	protein-coding
hypo1226	chr5:34180002-34190000	Intergenic	NR_037951	100534612	NR_037951	ENSG00000273294	C1QTNF3-AMACR	C1QTNF3-AMACR readthrough (NMD candidate)	ncRNA
hypo1227	chr3:57850002-57860000	intron (NM_001304420, intron 11 of 21)	NM_001304423	7871	NM_007159	ENSG00000163681	SLMAP	sarcolemma associated protein	protein-coding
hypo1228	chr6:75630002-75640000	Intergenic	NM_004370	1303	NM_004370	ENSG00000111799	COL12A1	collagen type XII alpha 1 chain	protein-coding
hypo1229	chr20:9130002-9140000	intron (NM_001172646, intron 1 of 37)	NM_182797	5332	NM_000933	ENSG00000101333	PLCB4	phospholipase C beta 4	protein-coding
hypo123	chr4:189650002-189660000	Intergenic	NR_033869	401164	NR_033869	ENSG00000249378	LINC01060	long intergenic non-protein coding RNA 1060	ncRNA
hypo1230	chr8:110500002-110510000	intron (NM_177531, intron 62 of 77)	NM_198120	9166	NM_004215	ENSG00000147654	EBAG9	estrogen receptor binding site associated, antigen, 9	protein-coding
hypo1231	chr7:145020002-145030000	Intergenic	NM_001042482	27010	NM_022445	ENSG00000196511	TPK1	thiamin pyrophosphokinase 1	protein-coding
hypo1232	chr2:208630002-208640000	promoter-TSS (NM_003468)	NM_003468	7855	NM_003468	ENSG00000163251	FZD5	frizzled class receptor 5	protein-coding
hypo1233	chr12:41730002-41740000	intron (NM_001164595, intron 3 of 9)	NM_013377	29951	NM_013377	ENSG00000165966	PDZRN4	PDZ domain containing ring finger 4	protein-coding
hypo1234	chr4:106470002-106480000	intron (NM_001242729, intron 1 of 13)	NM_017700	54848	NM_017700	ENSG00000236699	ARHGEF38	Rho guanine nucleotide exchange factor 38	protein-coding
hypo1235	chr8:50100002-50110000	Intergenic	NM_001007176	492307	NM_001007176	ENSG00000168333	C8orf22	chromosome 8 open reading frame 22	protein-coding
hypo1236	chr15:92110002-92120000	Intergenic	NR_110106	101926928	NR_110106	ENSG00000258551	CRAT37	cervical cancer-associated transcript 37	ncRNA
hypo1237	chr1:96640002-96650000	Intergenic	NR_125991	102723661	NR_125991	ENSG00000237435	LOC102723661	uncharacterized LOC102723661	ncRNA
hypo1238	chr3:15500002-15510000	intron (NM_080539, intron 11 of 15)	NR_036232	100422868	NR_036232	ENSG00000263573	MIR4270	microRNA 4270	ncRNA
hypo1239	chr19:30910002-30920000	intron (NM_014717, intron 1 of 4)	NM_014717	9745	NM_014717	ENSG00000198597	ZNF536	zinc finger protein 536	protein-coding
hypo124	chr17:48690002-48700000	intron (NM_001256325, intron 29 of 35)	NM_001144070	8714	NM_003786	ENSG00000108846	ABCC3	ATP binding cassette subfamily C member 3	protein-coding
hypo1240	chr13:85460002-85470000	Intergenic	NR_132852	106635542	NR_132852		SNORA107	small nucleolar RNA, H/ACA box 107	snoRNA
hypo1241	chr1:222870002-222880000	intron (NM_022831, intron 2 of 9)	NM_022831	64853	NM_022831	ENSG00000186063	AIDA	axin interactor, dorsalization associated	protein-coding
hypo1242	chr5:91480002-91490000	Intergenic	NM_020801	57561	NM_020801	ENSG00000113369	ARRDC3	arrestin domain containing 3	protein-coding
hypo1243	chrX:99810002-99820000	Intergenic	NM_022144	64102	NM_022144	ENSG00000000005	TNMD	tenomodulin	protein-coding
hypo1244	chr15:83210002-83220000	intron (NM_001079535, intron 9 of 9)	NM_001021	6218	NM_001021	ENSG00000182774	RPS17	ribosomal protein S17	protein-coding
hypo1245	chr15:81860002-81870000	Intergenic	NM_001080532	342125	NM_001080532	ENSG00000188869	TMC3	transmembrane channel like 3	protein-coding
hypo1246	chr12:13720002-13730000	intron (NM_000834, intron 9 of 12)	NR_036555	283422	NM_182558	ENSG00000180861	LINC01559	long intergenic non-protein coding RNA 1559	ncRNA
hypo1247	chr1:50560002-50570000	intron (NM_001324208, intron 1 of 6)	NM_001144776	1996	NM_021952	ENSG00000162374	ELAVL4	ELAV like RNA binding protein 4	protein-coding
hypo1248	chr6:152770002-152780000	intron (NM_182961, intron 24 of 145)	NR_120501	100505475	NR_120501		SYNE1-AS1	SYNE1 antisense RNA 1	ncRNA
hypo1249	chr6:143150002-143160000	intron (NM_006734, intron 2 of 9)	NM_006734	3097	NM_006734	ENSG00000010818	HIVEP2	human immunodeficiency virus type I enhancer binding protein 2	protein-coding
hypo125	chr17:6230002-6240000	Intergenic	NM_001285402	23746	NM_014336	ENSG00000129221	AIPL1	aryl hydrocarbon receptor interacting protein like 1	protein-coding
hypo1250	chr8:119560002-119570000	intron (NM_001101676, intron 2 of 4)	NR_038210	552860	NR_038210	ENSG00000281641	SAMD12-AS1	SAMD12 antisense RNA 1	ncRNA
hypo1251	chr12:107440002-107450000	intron (NM_004075, intron 1 of 12)	NM_004075	1407	NM_004075	ENSG00000008405	CRY1	cryptochrome circadian clock 1	protein-coding
hypo1252	chrX:108770002-108780000	Intergenic	NM_018698	55916	NM_018698	ENSG00000101888	NXT2	nuclear transport factor 2 like export factor 2	protein-coding
hypo1253	chr16:61680002-61690000	TTS (NM_001796)	NM_001796	1006	NM_001796	ENSG00000150394	CDH8	cadherin 8	protein-coding
hypo1254	chr22:36250002-36260000	intron (NM_001082578, intron 2 of 13)	NM_014309	23543	NM_014309	ENSG00000100320	RBFOX2	RNA binding protein, fox-1 homolog 2	protein-coding
hypo1255	chr15:100370002-100380000	intron (NR_135737, intron 3 of 4)	NR_135737	400464	NM_001013670	ENSG00000259363	LOC400464	ubiquitin conjugating enzyme E2 Q2 pseudogene	pseudo
hypo1256	chr17:30900002-30910000	intron (NM_015194, intron 21 of 21)	NM_003885	8851	NM_003885	ENSG00000176749	CDK5R1	cyclin dependent kinase 5 regulatory subunit 1	protein-coding
hypo1257	chr15:83850002-83860000	intron (NM_016073, intron 1 of 5)	NM_016073	50810	NM_016073	ENSG00000166503	HDGFRP3	hepatoma-derived growth factor, related protein 3	protein-coding
hypo1258	chr11:32400002-32410000	Intergenic	NM_001198551	7490	NM_000378	ENSG00000184937	WT1	Wilms tumor 1	protein-coding
hypo1259	chr16:21510002-21520000	Intergenic	NR_027155	100271836	NR_027155	ENSG00000180747	SMG1P3	SMG1P3, nonsense mediated mRNA decay associated PI3K related kinase pseudogene 3	pseudo
hypo126	chr1:15180002-15190000	intron (NM_201628, intron 1 of 14)	NM_001018000	23254	NM_015209	ENSG00000189337	KAZN	kazrin, periplakin interacting protein	protein-coding
hypo1260	chr2:167050002-167060000	3' UTR (NM_002977, exon 27 of 27)	NM_001202435	6323	NM_006920	ENSG00000144285	SCN1A	sodium voltage-gated channel alpha subunit 1	protein-coding
hypo1261	chr11:10020002-10030000	intron (NM_030962, intron 6 of 39)	NR_120539	101928008	NR_120539	ENSG00000255476	LOC101928008	uncharacterized LOC101928008	ncRNA
hypo1262	chr16:47620002-47630000	intron (NM_001031835, intron 11 of 31)	NM_000293	5257	NM_000293	ENSG00000102893	PHKB	phosphorylase kinase regulatory subunit beta	protein-coding
hypo1263	chr11:61720002-61730000	intron (NM_001139443, intron 5 of 8)	NM_001300787	7439	NM_004183	ENSG00000167995	BEST1	bestrophin 1	protein-coding
hypo1264	chr2:96670002-96680000	Intergenic	NR_003698	729234	NR_003698	ENSG00000231584	FAHD2CP	fumarylacetoacetate hydrolase domain containing 2C, pseudogene	pseudo
hypo1265	chr7:3010002-3020000	intron (NM_032415, intron 1 of 24)	NM_001324281	84433	NM_032415	ENSG00000198286	CARD11	caspase recruitment domain family member 11	protein-coding
hypo1266	chr12:130310002-130320000	intron (NM_133448, intron 1 of 8)	NM_133448	121256	NM_133448	ENSG00000151952	TMEM132D	transmembrane protein 132D	protein-coding
hypo1267	chr6:39300002-39310000	intron (NM_145027, intron 22 of 22)	NM_001135105	83795	NM_032115	ENSG00000095981	KCNK16	potassium two pore domain channel subfamily K member 16	protein-coding
hypo1268	chr9:93630002-93640000	intron (NM_001174167, intron 7 of 13)	NM_001174167	6850	NM_003177	ENSG00000165025	SYK	spleen associated tyrosine kinase	protein-coding
hypo1269	chr7:22740002-22750000	Intergenic	NM_001318095	3569	NM_000600	ENSG00000136244	IL6	interleukin 6	protein-coding
hypo127	chr5:137960002-137970000	Intergenic	NM_004134	3313	NM_004134	ENSG00000113013	HSPA9	heat shock protein family A (Hsp70) member 9	protein-coding
hypo1270	chr5:92960002-92970000	intron (NM_032042, intron 10 of 10)	NR_031754	100313887	NR_031754	ENSG00000113391	MIR2277	microRNA 2277	ncRNA
hypo1271	chr5:105810002-105820000	Intergenic	NR_104671	102467213	NR_104671	ENSG00000251027	LINC01950	long intergenic non-protein coding RNA 1950	ncRNA
hypo1272	chr18:44360002-44370000	Intergenic	NM_001307987	29906	NM_013305	ENSG00000101638	ST8SIA5	ST8 alpha-N-acetyl-neuraminide alpha-2,8-sialyltransferase 5	protein-coding
hypo1273	chr18:6500002-6510000	Intergenic	NR_120518	100130480	NM_001243517	ENSG00000265944	LINC01387	long intergenic non-protein coding RNA 1387	ncRNA
hypo1274	chr1:114160002-114170000	intron (NM_152900, intron 8 of 20)	NM_006608	10745	NM_006608	ENSG00000116793	PHTF1	putative homeodomain transcription factor 1	protein-coding
hypo1275	chr1:179420002-179430000	intron (NM_144696, intron 16 of 25)	NR_073544	126859	NM_144696	ENSG00000162779	AXDND1	axonemal dynein light chain domain containing 1	protein-coding
hypo1276	chr2:215530002-215540000	Intergenic	NM_001282548	580	NM_000465	ENSG00000138376	BARD1	BRCA1 associated RING domain 1	protein-coding
hypo1277	chr3:73060002-73070000	3' UTR (NM_001318028, exon 4 of 4)	NM_174907	151987	NM_174907	ENSG00000163605	PPP4R2	protein phosphatase 4 regulatory subunit 2	protein-coding
hypo1278	chr20:44520002-44530000	intron (NM_001127695, intron 11 of 14)	NM_080749	140825	NM_080749	ENSG00000124257	NEURL2	neuralized E3 ubiquitin protein ligase 2	protein-coding
hypo1279	chr6:13230002-13240000	intron (NM_001322314, intron 8 of 12)	NR_134859	100130357	NM_001242698		LOC100130357	uncharacterized LOC100130357	protein-coding
hypo128	chr22:42390002-42400000	TTS (NM_019106)	NM_152613	164684	NM_152613	ENSG00000183066	WBP2NL	WBP2 N-terminal like	protein-coding
hypo1280	chr12:39960002-39970000	intron (NM_005164, intron 9 of 9)	NM_005164	225	NM_005164	ENSG00000173208	ABCD2	ATP binding cassette subfamily D member 2	protein-coding
hypo1281	chrX:9950002-9960000	Intergenic	NM_001195081	100288814	NM_001195081	ENSG00000234469	CLDN34	claudin 34	protein-coding
hypo1282	chr14:94900002-94910000	Intergenic	NM_001080451	256394	NM_001080451	ENSG00000186910	SERPINA11	serpin family A member 11	protein-coding
hypo1283	chr20:290002-300000	Intergenic	NR_109990	100507459	NR_109990		NRSN2-AS1	NRSN2 antisense RNA 1	ncRNA
hypo1284	chr8:65410002-65420000	Intergenic	NR_015374	401463	NR_015374	ENSG00000254102	LOC401463	uncharacterized LOC401463	ncRNA
hypo1285	chr2:173190002-173200000	Intergenic	NM_001316306	3655	NM_000210	ENSG00000091409	ITGA6	integrin subunit alpha 6	protein-coding
hypo1286	chr11:121960002-121970000	intron (NR_137184, intron 1 of 1)	NR_029671	406911	NR_029671	ENSG00000207971	MIR125B1	microRNA 125b-1	ncRNA
hypo1287	chr2:23220002-23230000	Intergenic	NM_052920	114818	NM_025067	ENSG00000119771	KLHL29	kelch like family member 29	protein-coding
hypo1288	chr5:161570002-161580000	intron (NM_198904, intron 7 of 9)	NM_198903	2566	NM_000816	ENSG00000113327	GABRG2	gamma-aminobutyric acid type A receptor gamma2 subunit	protein-coding
hypo1289	chr6:4040002-4050000	intron (NM_003913, intron 6 of 14)	NM_003913	8899	NM_003913	ENSG00000112739	PRPF4B	pre-mRNA processing factor 4B	protein-coding
hypo129	chr10:91840002-91850000	Intergenic	NR_110655	101926924	NR_110655	ENSG00000226159	LINC01375	long intergenic non-protein coding RNA 1375	ncRNA
hypo1290	chr2:214470002-214480000	intron (NR_047660, intron 9 of 14)	NR_039640	100616375	NR_039640	ENSG00000265734	MIR4438	microRNA 4438	ncRNA
hypo1291	chr9:99970002-99980000	intron (NR_136286, intron 1 of 17)	NR_036527	57653	NR_036527	ENSG00000255036	LOC100499484-C9ORF174	LOC100499484-C9orf174 readthrough	ncRNA
hypo1292	chr11:59310002-59320000	Intergenic	NM_001004711	390199	NM_001004711	ENSG00000172742	OR4D9	olfactory receptor family 4 subfamily D member 9	protein-coding
hypo1293	chrX:4940002-4950000	Intergenic	NR_110390	101928201	NR_110390	ENSG00000236513	LOC101928201	uncharacterized LOC101928201	ncRNA
hypo1294	chr2:10950002-10960000	intron (NM_001282705, intron 2 of 13)	NM_005742	10130	NM_005742	ENSG00000143870	PDIA6	protein disulfide isomerase family A member 6	protein-coding
hypo1295	chr14:57550002-57560000	Intergenic	NM_018229	55745	NM_018229	ENSG00000053770	AP5M1	adaptor related protein complex 5 mu 1 subunit	protein-coding
hypo1296	chr14:83760002-83770000	Intergenic	NR_110074	101928559	NR_110074	ENSG00000258977	LINC01467	long intergenic non-protein coding RNA 1467	ncRNA
hypo1297	chr14:75530002-75540000	intron (NM_001302617, intron 1 of 2)	NM_001302617	97	NM_001107	ENSG00000119640	ACYP1	acylphosphatase 1	protein-coding
hypo1298	chr7:68400002-68410000	Intergenic	NR_108105	100507468	NR_108105		LOC100507468	uncharacterized LOC100507468	ncRNA
hypo1299	chr11:71360002-71370000	Intergenic	NM_001005405	440051	NM_001005405	ENSG00000204571	KRTAP5-11	keratin associated protein 5-11	protein-coding
hypo13	chr11:17030002-17040000	intron (NM_001329631, intron 3 of 22)	NM_001329630	144100	NM_175058	ENSG00000166689	PLEKHA7	pleckstrin homology domain containing A7	protein-coding
hypo130	chr17:45000002-45010000	intron (NM_001321134, intron 1 of 4)	NM_001321134	9570	NM_004287	ENSG00000108433	GOSR2	golgi SNAP receptor complex member 2	protein-coding
hypo1300	chr3:148060002-148070000	Intergenic	NR_134937	100507461	NR_134937	ENSG00000241131	LINC02032	long intergenic non-protein coding RNA 2032	ncRNA
hypo1301	chr9:35090002-35100000	intron (NM_001201484, intron 3 of 12)	NM_032634	84720	NM_032634	ENSG00000165282	PIGO	phosphatidylinositol glycan anchor biosynthesis class O	protein-coding
hypo1302	chr13:83200002-83210000	Intergenic	NM_052910	114798	NM_052910	ENSG00000178235	SLITRK1	SLIT and NTRK like family member 1	protein-coding
hypo1303	chr11:121920002-121930000	intron (NR_137178, intron 3 of 4)	NR_029671	406911	NR_029671	ENSG00000207971	MIR125B1	microRNA 125b-1	ncRNA
hypo1304	chr17:62090002-62100000	intron (NM_001099788, intron 1 of 5)	NM_001099786	3384	NM_000873	ENSG00000108622	ICAM2	intercellular adhesion molecule 2	protein-coding
hypo1305	chr5:80830002-80840000	intron (NM_012446, intron 4 of 16)	NM_130767	134526	NM_130767	ENSG00000172497	ACOT12	acyl-CoA thioesterase 12	protein-coding
hypo1306	chr15:41660002-41670000	intron (NM_001243144, intron 7 of 8)	NR_045620	51103	NM_016013	ENSG00000137806	NDUFAF1	NADH:ubiquinone oxidoreductase complex assembly factor 1	protein-coding
hypo1307	chr8:20940002-20950000	Intergenic	NR_033894	286114	NR_033894	ENSG00000253199	LINC02153	long intergenic non-protein coding RNA 2153	ncRNA
hypo1308	chr7:126610002-126620000	intron (NM_001127323, intron 3 of 10)	NR_030323	693177	NR_030323	ENSG00000207692	MIR592	microRNA 592	ncRNA
hypo1309	chr6:76550002-76560000	intron (NM_004999, intron 10 of 34)	NM_004999	4646	NM_004999	ENSG00000196586	MYO6	myosin VI	protein-coding
hypo131	chr7:157050002-157060000	intron (NM_014671, intron 22 of 22)	NM_005494	10049	NM_005494	ENSG00000105993	DNAJB6	DnaJ heat shock protein family (Hsp40) member B6	protein-coding
hypo1310	chr10:105910002-105920000	intron (NM_025145, intron 27 of 37)	NM_001002759	119392	NM_145247	ENSG00000156384	SFR1	SWI5 dependent homologous recombination repair protein 1	protein-coding
hypo1311	chr4:52700002-52710000	Intergenic	NM_015115	23142	NM_015115	ENSG00000109184	DCUN1D4	defective in cullin neddylation 1 domain containing 4	protein-coding
hypo1312	chr2:191840002-191850000	intron (NM_007315, intron 19 of 24)	NM_007315	6772	NM_007315	ENSG00000115415	STAT1	signal transducer and activator of transcription 1	protein-coding
hypo1313	chr16:79500002-79510000	Intergenic	NM_005360	4094	NM_005360	ENSG00000178573	MAF	MAF bZIP transcription factor	protein-coding
hypo1314	chr5:12760002-12770000	intron (NR_033383, intron 3 of 3)	NR_039659	100616234	NR_039659	ENSG00000283468	MIR4454	microRNA 4454	ncRNA
hypo1315	chr9:17220002-17230000	intron (NM_017738, intron 2 of 25)	NM_017738	54875	NM_017738	ENSG00000044459	CNTLN	centlein	protein-coding
hypo1316	chr3:22000002-22010000	intron (NR_046876, intron 2 of 3)	NR_046876	100874221	NR_046876	ENSG00000223351	ZNF385D-AS2	ZNF385D antisense RNA 2	ncRNA
hypo1317	chr7:112900002-112910000	Intergenic	NR_024412	401397	NR_015442	ENSG00000214194	LINC00998	long intergenic non-protein coding RNA 998	ncRNA
hypo1318	chr11:88150002-88160000	Intergenic	NR_049724	100873989	NR_049724	ENSG00000255082	GRM5-AS1	GRM5 antisense RNA 1	ncRNA
hypo1319	chr3:191930002-191940000	intron (NM_004113, intron 4 of 5)	NR_046596	100873986	NR_046596	ENSG00000231383	FGF12-AS1	FGF12 antisense RNA 1	ncRNA
hypo132	chr1:46730002-46740000	intron (NM_001142548, intron 10 of 18)	NM_003579	8438	NM_003579	ENSG00000085999	RAD54L	RAD54-like (S. cerevisiae)	protein-coding
hypo1320	chr18:69610002-69620000	Intergenic	NR_126324	102724913	NR_126324	ENSG00000265352	LINC01899	long intergenic non-protein coding RNA 1899	ncRNA
hypo1321	chr5:132270002-132280000	intron (NM_014423, intron 1 of 20)	NM_014423	27125	NM_014423	ENSG00000072364	AFF4	AF4/FMR2 family member 4	protein-coding
hypo1322	chr2:211370002-211380000	intron (NM_001122633, intron 1 of 38)	NM_001122633	1373	NM_001875	ENSG00000021826	CPS1	carbamoyl-phosphate synthase 1	protein-coding
hypo1323	chr3:41980002-41990000	intron (NR_136342, intron 2 of 34)	NM_017886	54986	NM_017886	ENSG00000168038	ULK4	unc-51 like kinase 4	protein-coding
hypo1324	chr8:64170002-64180000	Intergenic	NM_001277818	253943	NM_152758	ENSG00000185728	YTHDF3	YTH N6-methyladenosine RNA binding protein 3	protein-coding
hypo1325	chr4:165200002-165210000	intron (NM_001166373, intron 1 of 7)	NM_012403	23520	NM_012403		ANP32C	acidic nuclear phosphoprotein 32 family member C	protein-coding
hypo1326	chr19:15880002-15890000	intron (NR_033864, intron 2 of 9)	NR_033864	388514	NR_033864		CYP4F24P	cytochrome P450 family 4 subfamily F member 24, pseudogene	pseudo
hypo1327	chrX:120580002-120590000	Intergenic	NR_037444	100500869	NR_037444	ENSG00000265456	MIR3672	microRNA 3672	ncRNA
hypo1328	chr6:21330002-21340000	Intergenic	NR_103790	100874531	NR_103790	ENSG00000280989	LINC00581	long intergenic non-protein coding RNA 581	ncRNA
hypo1329	chr22:33650002-33660000	Intergenic	NR_134617	105373006	NR_134617	ENSG00000231253	LINC01640	long intergenic non-protein coding RNA 1640	ncRNA
hypo133	chr1:211900002-211910000	Intergenic	NM_001204183	4751	NM_002497	ENSG00000117650	NEK2	NIMA related kinase 2	protein-coding
hypo1330	chr11:76370002-76380000	intron (NM_001128922, intron 2 of 2)	NM_005512	2615	NM_005512	ENSG00000137507	LRRC32	leucine rich repeat containing 32	protein-coding
hypo1331	chr12:126400002-126410000	Intergenic	NR_034132	400084	NR_034132	ENSG00000249267	LINC00939	long intergenic non-protein coding RNA 939	ncRNA
hypo1332	chr3:15650002-15660000	intron (NM_001281725, intron 1 of 3)	NM_001281725	686	NM_000060	ENSG00000169814	BTD	biotinidase	protein-coding
hypo1333	chr20:30700002-30710000	intron (NM_014742, intron 1 of 17)	NM_014742	9777	NM_014742	ENSG00000101337	TM9SF4	transmembrane 9 superfamily member 4	protein-coding
hypo1334	chr1:118620002-118630000	intron (NM_206996, intron 13 of 48)	NM_206996	200162	NM_206996	ENSG00000155761	SPAG17	sperm associated antigen 17	protein-coding
hypo1335	chr10:123100002-123110000	Intergenic	NM_001320654	2263	NM_000141	ENSG00000066468	FGFR2	fibroblast growth factor receptor 2	protein-coding
hypo1336	chr21:33290002-33300000	intron (NM_014586, intron 1 of 10)	NM_014586	30811	NM_014586	ENSG00000142149	HUNK	hormonally up-regulated Neu-associated kinase	protein-coding
hypo1337	chr19:38860002-38870000	promoter-TSS (NM_002812)	NM_002812	5714	NM_002812	ENSG00000099341	PSMD8	proteasome 26S subunit, non-ATPase 8	protein-coding
hypo1338	chr4:162060002-162070000	Intergenic	NR_125888	101928052	NR_125888	ENSG00000249419	LOC101928052	uncharacterized LOC101928052	ncRNA
hypo1339	chr6:48340002-48350000	Intergenic	NM_207499	442213	NM_207499	ENSG00000244694	PTCHD4	patched domain containing 4	protein-coding
hypo134	chr13:114460002-114470000	intron (NM_182614, intron 1 of 8)	NM_182614	348013	NM_182614	ENSG00000184497	TMEM255B	transmembrane protein 255B	protein-coding
hypo1340	chr3:44550002-44560000	Intergenic	NM_001287349	285346	NM_001287349	ENSG00000178917	ZNF852	zinc finger protein 852	protein-coding
hypo1341	chr18:54390002-54400000	intron (NM_052834, intron 13 of 26)	NM_015285	23335	NM_015285	ENSG00000091157	WDR7	WD repeat domain 7	protein-coding
hypo1342	chr5:22310002-22320000	intron (NM_004061, intron 3 of 14)	NM_001317228	1010	NM_004061	ENSG00000154162	CDH12	cadherin 12	protein-coding
hypo1343	chr3:87620002-87630000	Intergenic	NM_001322209	3355	NM_000866	ENSG00000179097	HTR1F	5-hydroxytryptamine receptor 1F	protein-coding
hypo1344	chr11:38200002-38210000	Intergenic	NR_135110	105376633	NR_135110	ENSG00000254516	LOC105376633	uncharacterized LOC105376633	ncRNA
hypo1345	chr18:13880002-13890000	exon (NM_000529, exon 2 of 2)	NM_000529	4158	NM_000529	ENSG00000185231	MC2R	melanocortin 2 receptor	protein-coding
hypo1346	chr1:183580002-183590000	Intergenic	NM_001270439	10092	NM_005717	ENSG00000162704	ARPC5	actin related protein 2/3 complex subunit 5	protein-coding
hypo1347	chr6:139820002-139830000	Intergenic	NR_033919	645434	NR_033919	ENSG00000238099	LINC01625	long intergenic non-protein coding RNA 1625	ncRNA
hypo1348	chr1:111810002-111820000	Intergenic	NR_003928	149620	NM_001013621	ENSG00000203878	CHIAP2	chitinase, acidic pseudogene 2	pseudo
hypo1349	chrX:44600002-44610000	Intergenic	NM_022076	63904	NM_022076	ENSG00000189037	DUSP21	dual specificity phosphatase 21	protein-coding
hypo135	chr9:132300002-132310000	Intergenic	NR_038955	100506190	NR_038955		LINC00963	long intergenic non-protein coding RNA 963	ncRNA
hypo1350	chr8:97240002-97250000	intron (NR_045639, intron 2 of 4)	NM_001254752	7381	NM_006294	ENSG00000156467	UQCRB	ubiquinol-cytochrome c reductase binding protein	protein-coding
hypo1351	chr12:98890002-98900000	intron (NR_038383, intron 2 of 3)	NR_038383	643770	NR_038383	ENSG00000245017	LOC643770	uncharacterized LOC643770	ncRNA
hypo1352	chr6:71240002-71250000	intron (NM_001331004, intron 17 of 20)	NM_145267	135154	NM_145267	ENSG00000154079	SDHAF4	succinate dehydrogenase complex assembly factor 4	protein-coding
hypo1353	chr5:23050002-23060000	Intergenic	NM_004061	1010	NM_004061	ENSG00000154162	CDH12	cadherin 12	protein-coding
hypo1354	chrX:105940002-105950000	intron (NM_024539, intron 1 of 6)	NM_024539	79589	NM_024539	ENSG00000133135	RNF128	ring finger protein 128, E3 ubiquitin protein ligase	protein-coding
hypo1355	chr10:77070002-77080000	intron (NR_038226, intron 2 of 3)	NR_038223	253264	NR_038223	ENSG00000226051	ZNF503-AS1	ZNF503 antisense RNA 1	ncRNA
hypo1356	chr21:36020002-36030000	Intergenic	NM_001317009	54102	NM_053277	ENSG00000159212	CLIC6	chloride intracellular channel 6	protein-coding
hypo1357	chr10:98440002-98450000	intron (NM_152309, intron 2 of 16)	NM_152309	118788	NM_152309	ENSG00000155629	PIK3AP1	phosphoinositide-3-kinase adaptor protein 1	protein-coding
hypo1358	chr3:138470002-138480000	intron (NM_006219, intron 1 of 21)	NM_006219	5291	NM_006219	ENSG00000051382	PIK3CB	phosphatidylinositol-4,5-bisphosphate 3-kinase catalytic subunit beta	protein-coding
hypo1359	chr4:114540002-114550000	intron (NM_001321576, intron 3 of 17)	NM_001321578	817	NM_001221	ENSG00000145349	CAMK2D	calcium/calmodulin dependent protein kinase II delta	protein-coding
hypo136	chrX:67880002-67890000	intron (NM_014725, intron 1 of 13)	NM_001142503	9754	NM_014725	ENSG00000130052	STARD8	StAR related lipid transfer domain containing 8	protein-coding
hypo1360	chr1:88430002-88440000	Intergenic	NR_038324	100505768	NR_038324	ENSG00000227290	LINC01364	long intergenic non-protein coding RNA 1364	ncRNA
hypo1361	chr12:130280002-130290000	intron (NM_133448, intron 1 of 8)	NM_133448	121256	NM_133448	ENSG00000151952	TMEM132D	transmembrane protein 132D	protein-coding
hypo1362	chr2:172900002-172910000	intron (NM_001322279, intron 1 of 9)	NR_136276	254042	NM_199227	ENSG00000172878	METAP1D	methionyl aminopeptidase type 1D, mitochondrial	protein-coding
hypo1363	chr9:107090002-107100000	Intergenic	NR_135141	105376194	NR_135141		LOC105376194	uncharacterized LOC105376194	ncRNA
hypo1364	chrX:122770002-122780000	intron (NM_001081550, intron 15 of 38)	NM_001081550	57187	NM_020449	ENSG00000125676	THOC2	THO complex 2	protein-coding
hypo1365	chr6:106600002-106610000	Intergenic	NM_182907	639	NM_001198	ENSG00000057657	PRDM1	PR/SET domain 1	protein-coding
hypo1366	chr19:54300002-54310000	intron (NM_144687, intron 6 of 9)	NR_029866	442918	NR_029866	ENSG00000199143	MIR373	microRNA 373	ncRNA
hypo1367	chr10:44210002-44220000	Intergenic	NR_134484	102724264	NR_134483	ENSG00000234973	LOC102724264	uncharacterized LOC102724264	ncRNA
hypo1368	chrX:37510002-37520000	exon (NM_001170331, exon 2 of 5)	NM_021083	7504	NM_021083	ENSG00000047597	XK	X-linked Kx blood group	protein-coding
hypo1369	chr2:186670002-186680000	intron (NM_173651, intron 17 of 22)	NR_144454	107985781	NR_144453		FSIP2-AS1	FSIP2 antisense RNA 1	ncRNA
hypo137	chr4:184070002-184080000	intron (NM_024949, intron 1 of 22)	NM_024949	80014	NM_024949	ENSG00000151718	WWC2	WW and C2 domain containing 2	protein-coding
hypo1370	chr7:86300002-86310000	intron (NM_000840, intron 1 of 5)	NM_000840	2913	NM_000840	ENSG00000198822	GRM3	glutamate metabotropic receptor 3	protein-coding
hypo1371	chr12:115710002-115720000	Intergenic	NM_005996	6926	NM_005996	ENSG00000135111	TBX3	T-box 3	protein-coding
hypo1372	chr19:4830002-4840000	Intergenic	NM_182919	148022	NM_014261	ENSG00000127666	TICAM1	toll like receptor adaptor molecule 1	protein-coding
hypo1373	chr10:96110002-96120000	intron (NM_022451, intron 5 of 20)	NM_022451	64318	NM_022451	ENSG00000173145	NOC3L	NOC3 like DNA replication regulator	protein-coding
hypo1374	chr16:71800002-71810000	intron (NM_001030007, intron 5 of 23)	NR_003059	692111	NR_003059	ENSG00000223224	SNORD71	small nucleolar RNA, C/D box 71	snoRNA
hypo1375	chr13:37980002-37990000	Intergenic	NR_125762	103695431	NR_125762	ENSG00000230390	LINC01048	long intergenic non-protein coding RNA 1048	ncRNA
hypo1376	chr11:25510002-25520000	Intergenic	NM_001313726	63982	NM_031418	ENSG00000134343	ANO3	anoctamin 3	protein-coding
hypo1377	chr20:60000002-60010000	intron (NM_001794, intron 2 of 15)	NM_001252338	1002	NM_001794	ENSG00000179242	CDH4	cadherin 4	protein-coding
hypo1378	chr21:18770002-18780000	Intergenic	NR_037586	100505929	NM_001005521	ENSG00000232560	LINC01549	long intergenic non-protein coding RNA 1549	ncRNA
hypo1379	chr8:105800002-105810000	Intergenic	NM_001135703	29967	NM_013437	ENSG00000147650	LRP12	LDL receptor related protein 12	protein-coding
hypo138	chr14:23650002-23660000	Intergenic	NM_012244	23428	NM_012244	ENSG00000092068	SLC7A8	solute carrier family 7 member 8	protein-coding
hypo1380	chr3:170540002-170550000	Intergenic	NR_135259	200916	NM_001099645	ENSG00000163584	RPL22L1	ribosomal protein L22 like 1	protein-coding
hypo1381	chr10:129560002-129570000	Intergenic	NM_207426	399823	NM_207426	ENSG00000186766	FOXI2	forkhead box I2	protein-coding
hypo1382	chr1:172200002-172210000	intron (NM_015569, intron 14 of 20)	NR_103486	100628315	NR_038397	ENSG00000230630	DNM3OS	DNM3 opposite strand/antisense RNA	ncRNA
hypo1383	chr5:67050002-67060000	Intergenic	NR_130779	101928858	NR_130779	ENSG00000249364	LOC101928858	uncharacterized LOC101928858	ncRNA
hypo1384	chrX:100790002-100800000	Intergenic	NM_016608	51309	NM_016608	ENSG00000126947	ARMCX1	armadillo repeat containing, X-linked 1	protein-coding
hypo1385	chr13:23760002-23770000	intron (NM_000231, intron 1 of 7)	NM_000231	6445	NM_000231	ENSG00000102683	SGCG	sarcoglycan gamma	protein-coding
hypo1386	chr3:146570002-146580000	Intergenic	NR_135561	101927866	NR_135560	ENSG00000242671	LINC02010	long intergenic non-protein coding RNA 2010	ncRNA
hypo1387	chr5:10100002-10110000	Intergenic	NR_047670	134145	NM_199133	ENSG00000150756	FAM173B	family with sequence similarity 173 member B	protein-coding
hypo1388	chr19:5800002-5810000	Intergenic	NM_020175	56931	NM_020175	ENSG00000141994	DUS3L	dihydrouridine synthase 3 like	protein-coding
hypo1389	chr4:169280002-169290000	intron (NM_001345927, intron 36 of 37)	NM_017631	55601	NM_017631	ENSG00000137628	DDX60	DExD/H-box helicase 60	protein-coding
hypo139	chr12:8160002-8170000	Intergenic	NM_018416	55810	NM_018416	ENSG00000065970	FOXJ2	forkhead box J2	protein-coding
hypo1390	chr15:96530002-96540000	Intergenic	NM_001145155	7026	NM_021005	ENSG00000185551	NR2F2	nuclear receptor subfamily 2 group F member 2	protein-coding
hypo1391	chr12:105880002-105890000	Intergenic	NM_001145199	387882	NM_207376	ENSG00000235162	C12orf75	chromosome 12 open reading frame 75	protein-coding
hypo1392	chr1:41440002-41450000	promoter-TSS (NM_001905)	NR_125440	1503	NM_001905	ENSG00000171793	CTPS1	CTP synthase 1	protein-coding
hypo1393	chr2:178170002-178180000	intron (NR_026966, intron 8 of 8)	NR_106767	102465255	NR_106767	ENSG00000278418	MIR6512	microRNA 6512	ncRNA
hypo1394	chr8:77240002-77250000	Intergenic	NR_105006	101926978	NR_105006	ENSG00000254300	LINC01111	long intergenic non-protein coding RNA 1111	ncRNA
hypo1395	chr6:140050002-140060000	Intergenic	NR_038399	100132735	NR_038399		LOC100132735	uncharacterized LOC100132735	ncRNA
hypo1396	chr7:151800002-151810000	intron (NM_022087, intron 5 of 11)	NM_022087	63917	NM_022087	ENSG00000178234	GALNT11	polypeptide N-acetylgalactosaminyltransferase 11	protein-coding
hypo1397	chr19:18260002-18270000	intron (NM_005027, intron 1 of 15)	NR_073517	5296	NM_005027	ENSG00000105647	PIK3R2	phosphoinositide-3-kinase regulatory subunit 2	protein-coding
hypo1398	chr4:172900002-172910000	intron (NM_001034845, intron 2 of 12)	NR_134656	441052	NR_134656		LOC441052	uncharacterized LOC441052	ncRNA
hypo1399	chr1:1300002-1310000	Intergenic	NM_001127230	54998	NM_017900	ENSG00000175756	AURKAIP1	aurora kinase A interacting protein 1	protein-coding
hypo14	chr5:80990002-81000000	intron (NM_012446, intron 1 of 16)	NM_001256732	23635	NM_012446	ENSG00000145687	SSBP2	single stranded DNA binding protein 2	protein-coding
hypo140	chr22:48600002-48610000	Intergenic	NR_036172	100422916	NR_036172	ENSG00000266508	MIR3201	microRNA 3201	ncRNA
hypo1400	chr1:240590002-240600000	intron (NM_001305424, intron 16 of 18)	NR_128706	100526648	NR_128706	ENSG00000265031	MIR1273E	microRNA 1273e	ncRNA
hypo1401	chr3:190960002-190970000	intron (NM_198184, intron 3 of 4)	NR_133663	106480738	NR_133663	ENSG00000233308	OSTN-AS1	OSTN antisense RNA 1	ncRNA
hypo1402	chr11:59530002-59540000	intron (NM_004177, intron 1 of 10)	NM_001178040	6809	NM_004177	ENSG00000166900	STX3	syntaxin 3	protein-coding
hypo1403	chr9:110980002-110990000	Intergenic	NM_006686	10880	NM_006686	ENSG00000148156	ACTL7B	actin like 7B	protein-coding
hypo1404	chr9:82750002-82760000	Intergenic	NR_121212	101927477	NR_121212		LINC01507	long intergenic non-protein coding RNA 1507	ncRNA
hypo1405	chr14:77380002-77390000	Intergenic	NR_133913	105370578	NR_133913	ENSG00000258602	LINC01629	long intergenic non-protein coding RNA 1629	ncRNA
hypo1406	chr2:181190002-181200000	Intergenic	NM_020943	57703	NM_020943	ENSG00000163510	CWC22	CWC22 spliceosome associated protein homolog	protein-coding
hypo1407	chr4:40470002-40480000	intron (NM_001098634, intron 2 of 6)	NR_039966	100616274	NR_039966	ENSG00000263642	MIR4802	microRNA 4802	ncRNA
hypo1408	chr10:28640002-28650000	Intergenic	NM_001318170	143098	NM_173496	ENSG00000150054	MPP7	membrane palmitoylated protein 7	protein-coding
hypo1409	chr4:135600002-135610000	Intergenic	NM_001114734	132430	NM_001114734	ENSG00000254535	PABPC4L	poly(A) binding protein cytoplasmic 4 like	protein-coding
hypo141	chr9:35670002-35680000	intron (NM_001216, intron 1 of 10)	NM_001216	768	NM_001216	ENSG00000107159	CA9	carbonic anhydrase 9	protein-coding
hypo1410	chr19:15660002-15670000	Intergenic	NM_173483	126410	NM_173483	ENSG00000171954	CYP4F22	cytochrome P450 family 4 subfamily F member 22	protein-coding
hypo1411	chr9:30540002-30550000	Intergenic	NR_046204	401497	NR_046204		LINC01242	long intergenic non-protein coding RNA 1242	ncRNA
hypo1412	chr7:89250002-89260000	Intergenic	NR_003551	442523	NR_003551	ENSG00000235436	DPY19L2P4	DPY19L2 pseudogene 4	pseudo
hypo1413	chr12:93790002-93800000	non-coding (NR_104005, exon 5 of 5)	NM_001301024	11163	NM_019094	ENSG00000173598	NUDT4	nudix hydrolase 4	protein-coding
hypo1414	chr3:46660002-46670000	intron (NM_001195442, intron 2 of 2)	NM_001195442	100132146	NM_001195442	ENSG00000283473	LOC100132146	uncharacterized LOC100132146	protein-coding
hypo1415	chr14:24000002-24010000	intron (NM_033400, intron 1 of 9)	NM_033400	85446	NM_033400	ENSG00000136367	ZFHX2	zinc finger homeobox 2	protein-coding
hypo1416	chr1:245860002-245870000	intron (NM_018012, intron 14 of 14)	NM_018012	55083	NM_018012	ENSG00000162849	KIF26B	kinesin family member 26B	protein-coding
hypo1417	chr2:187780002-187790000	Intergenic	NM_182521	151112	NM_182521	ENSG00000163012	ZSWIM2	zinc finger SWIM-type containing 2	protein-coding
hypo1418	chr12:75600002-75610000	Intergenic	NM_139136	3747	NM_139136	ENSG00000166006	KCNC2	potassium voltage-gated channel subfamily C member 2	protein-coding
hypo1419	chr1:236240002-236250000	Intergenic	NM_002508	4811	NM_002508	ENSG00000116962	NID1	nidogen 1	protein-coding
hypo142	chr15:97330002-97340000	Intergenic	NM_001304805	145946	NM_173499	ENSG00000185594	SPATA8	spermatogenesis associated 8	protein-coding
hypo1420	chr18:70840002-70850000	intron (NR_034133, intron 3 of 5)	NR_034133	400655	NR_034133	ENSG00000263711	LOC400655	uncharacterized LOC400655	ncRNA
hypo1421	chr1:10380002-10390000	intron (NM_015074, intron 24 of 46)	NR_125730	103625684	NR_125730	ENSG00000207357	RNU6-2	RNA, U6 small nuclear 2	snRNA
hypo1422	chr19:10970002-10980000	intron (NM_001136482, intron 6 of 6)	NM_199141	10498	NM_199141	ENSG00000142453	CARM1	coactivator associated arginine methyltransferase 1	protein-coding
hypo1423	chr8:98080002-98090000	intron (NM_016134, intron 7 of 7)	NM_033512	85453	NM_033512	ENSG00000180543	TSPYL5	TSPY like 5	protein-coding
hypo1424	chr18:8410002-8420000	Intergenic	NR_024419	100192426	NR_024419	ENSG00000266149	LOC100192426	uncharacterized LOC100192426	ncRNA
hypo1425	chrX:106800002-106810000	intron (NM_032428, intron 11 of 15)	NR_046750	100874122	NR_046750	ENSG00000227610	FRMPD3-AS1	FRMPD3 antisense RNA 1	ncRNA
hypo1426	chr6:21840002-21850000	intron (NR_015410, intron 4 of 11)	NR_015410	401237	NR_015410	ENSG00000272168	CASC15	cancer susceptibility candidate 15 (non-protein coding)	ncRNA
hypo1427	chr17:57350002-57360000	Intergenic	NM_001005404	388403	NM_001005404	ENSG00000175155	YPEL2	yippee like 2	protein-coding
hypo1428	chr1:174750002-174760000	intron (NM_014857, intron 18 of 20)	NM_001330989	9910	NM_014857	ENSG00000152061	RABGAP1L	RAB GTPase activating protein 1 like	protein-coding
hypo1429	chr7:149950002-149960000	intron (NM_001164458, intron 6 of 7)	NM_001164459	653857	NM_001164458	ENSG00000106526	ACTR3C	ARP3 actin-related protein 3 homolog C	protein-coding
hypo143	chr15:28140002-28150000	intron (NM_001300984, intron 18 of 22)	NM_001300984	4948	NM_000275	ENSG00000104044	OCA2	OCA2 melanosomal transmembrane protein	protein-coding
hypo1430	chr2:53550002-53560000	Intergenic	NM_001008708	494143	NM_001008708	ENSG00000143942	CHAC2	ChaC cation transport regulator homolog 2	protein-coding
hypo1431	chr16:68850002-68860000	intron (NM_004360, intron 11 of 15)	NM_024562	79613	NM_024562	ENSG00000103047	TANGO6	transport and golgi organization 6 homolog	protein-coding
hypo1432	chr8:1780002-1790000	intron (NM_001308153, intron 2 of 29)	NM_014629	9639	NM_014629	ENSG00000104728	ARHGEF10	Rho guanine nucleotide exchange factor 10	protein-coding
hypo1433	chr2:169880002-169890000	intron (NM_003742, intron 1 of 27)	NM_003742	8647	NM_003742	ENSG00000073734	ABCB11	ATP binding cassette subfamily B member 11	protein-coding
hypo1434	chr18:39680002-39690000	Intergenic	NR_046454	284260	NR_046174	ENSG00000267586	LINC00907	long intergenic non-protein coding RNA 907	ncRNA
hypo1435	chr18:42720002-42730000	Intergenic	NM_001242692	8170	NM_007163	ENSG00000132874	SLC14A2	solute carrier family 14 member 2	protein-coding
hypo1436	chr12:53490002-53500000	intron (NM_002178, intron 3 of 3)	NM_003578	8435	NM_003578	ENSG00000167780	SOAT2	sterol O-acyltransferase 2	protein-coding
hypo1437	chr5:37370002-37380000	Intergenic	NM_153485	9631	NM_004298	ENSG00000113569	NUP155	nucleoporin 155	protein-coding
hypo1438	chr13:53380002-53390000	TTS (NR_031582)	NR_031582	100313778	NR_031582	ENSG00000211579	MIR759	microRNA 759	ncRNA
hypo1439	chr1:241440002-241450000	intron (NM_002924, intron 2 of 17)	NM_001282775	6000	NM_002924	ENSG00000182901	RGS7	regulator of G-protein signaling 7	protein-coding
hypo144	chr22:44750002-44760000	Intergenic	NM_001099294	85352	NM_001099294	ENSG00000138944	KIAA1644	KIAA1644	protein-coding
hypo1440	chr7:15740002-15750000	Intergenic	NR_110094	101927524	NR_110094		MEOX2-AS1	MEOX2 antisense RNA 1 (head to head)	ncRNA
hypo1441	chr12:99460002-99470000	intron (NM_152788, intron 16 of 25)	NR_110095	101928937	NR_110095	ENSG00000258039	LOC101928937	uncharacterized LOC101928937	ncRNA
hypo1442	chr1:191020002-191030000	Intergenic	NR_033922	440704	NR_033922	ENSG00000231175	LINC01720	long intergenic non-protein coding RNA 1720	ncRNA
hypo1443	chr13:43780002-43790000	Intergenic	NR_047013	100874159	NR_047013		LINC00400	long intergenic non-protein coding RNA 400	ncRNA
hypo1444	chrX:74540002-74550000	Intergenic	NR_030774	139596	NM_145052	ENSG00000094841	UPRT	uracil phosphoribosyltransferase homolog	protein-coding
hypo1445	chr2:178800002-178810000	intron (NM_001077197, intron 3 of 20)	NM_001077358	50940	NM_016953	ENSG00000128655	PDE11A	phosphodiesterase 11A	protein-coding
hypo1446	chr17:20810002-20820000	Intergenic	NM_001004306	339184	NM_001004306	ENSG00000205212	CCDC144NL	coiled-coil domain containing 144 family, N-terminal like	protein-coding
hypo1447	chr8:120000002-120010000	intron (NM_001324095, intron 1 of 7)	NM_001324095	10584	NM_006438	ENSG00000184374	COLEC10	collectin subfamily member 10	protein-coding
hypo1448	chr19:44690002-44700000	Intergenic	NM_001289172	7770	NM_182490	ENSG00000131115	ZNF227	zinc finger protein 227	protein-coding
hypo1449	chr3:90220002-90230000	Intergenic	NM_005233	2042	NM_005233	ENSG00000044524	EPHA3	EPH receptor A3	protein-coding
hypo145	chr1:45260002-45270000	promoter-TSS (NM_004073)	NM_004073	1263	NM_004073	ENSG00000173846	PLK3	polo like kinase 3	protein-coding
hypo1450	chr6:87680002-87690000	intron (NM_000865, intron 1 of 1)	NM_000865	3354	NM_000865	ENSG00000168830	HTR1E	5-hydroxytryptamine receptor 1E	protein-coding
hypo1451	chr5:42080002-42090000	Intergenic	NR_104635	101926960	NR_104635		LOC101926960	uncharacterized LOC101926960	ncRNA
hypo1452	chr7:147620002-147630000	intron (NM_014141, intron 14 of 23)	NR_036093	100422849	NR_036093	ENSG00000221296	MIR548T	microRNA 548t	ncRNA
hypo1453	chrX:16360002-16370000	Intergenic	NM_001277307	645864	NM_001277307	ENSG00000182798	MAGEB17	MAGE family member B17	protein-coding
hypo1454	chr5:52440002-52450000	Intergenic	NR_104654	257396	NR_034107	ENSG00000247796	LOC257396	uncharacterized LOC257396	ncRNA
hypo1455	chr5:680002-690000	intron (NM_007030, intron 1 of 3)	NM_007030	11076	NM_007030	ENSG00000171368	TPPP	tubulin polymerization promoting protein	protein-coding
hypo1456	chr5:165010002-165020000	Intergenic	NR_105065	102546299	NR_105065	ENSG00000241956	LOC102546299	uncharacterized LOC102546299	ncRNA
hypo1457	chr2:192280002-192290000	intron (NM_001130158, intron 30 of 30)	NM_001330238	4430	NM_012223	ENSG00000128641	MYO1B	myosin IB	protein-coding
hypo1458	chr1:201280002-201290000	intron (NM_001005337, intron 3 of 13)	NM_001005337	5317	NM_000299	ENSG00000081277	PKP1	plakophilin 1	protein-coding
hypo1459	chr2:127470002-127480000	Intergenic	NM_002101	2995	NM_002101	ENSG00000136732	GYPC	glycophorin C (Gerbich blood group)	protein-coding
hypo146	chr15:81400002-81410000	Intergenic	NM_173528	161502	NM_173528	ENSG00000156206	CFAP161	cilia and flagella associated protein 161	protein-coding
hypo1460	chr10:28370002-28380000	intron (NM_001318170, intron 12 of 16)	NR_132973	106635548	NR_132973		SNORD130	small nucleolar RNA, C/D box 130	snoRNA
hypo1461	chr3:12340002-12350000	intron (NM_138711, intron 1 of 7)	NM_001330615	5468	NM_005037	ENSG00000132170	PPARG	peroxisome proliferator activated receptor gamma	protein-coding
hypo1462	chr4:25670002-25680000	intron (NM_001177999, intron 10 of 12)	NM_001177999	10568	NM_006424	ENSG00000157765	SLC34A2	solute carrier family 34 member 2	protein-coding
hypo1463	chr15:55080002-55090000	Intergenic	NR_135679	105370829	NR_135679	ENSG00000260937	LOC105370829	uncharacterized LOC105370829	ncRNA
hypo1464	chrX:44410002-44420000	Intergenic	NM_173794	139341	NM_173794	ENSG00000069509	FUNDC1	FUN14 domain containing 1	protein-coding
hypo1465	chrX:122620002-122630000	TTS (NM_000828)	NM_001081550	57187	NM_020449	ENSG00000125676	THOC2	THO complex 2	protein-coding
hypo1466	chr1:172070002-172080000	intron (NM_015569, intron 13 of 20)	NR_036066	100422882	NR_036066	ENSG00000283152	MIR3120	microRNA 3120	ncRNA
hypo1467	chr2:234970002-234980000	intron (NM_006944, intron 4 of 7)	NM_006944	6694	NM_006944	ENSG00000072080	SPP2	secreted phosphoprotein 2	protein-coding
hypo1468	chr8:57630002-57640000	Intergenic	NR_038236	100507632	NR_038236	ENSG00000246430	LINC00968	long intergenic non-protein coding RNA 968	ncRNA
hypo1469	chr3:190110002-190120000	intron (NM_006580, intron 1 of 4)	NM_006580	10686	NM_006580	ENSG00000113946	CLDN16	claudin 16	protein-coding
hypo147	chr1:224050002-224060000	Intergenic	NM_005426	7159	NM_005426	ENSG00000143514	TP53BP2	tumor protein p53 binding protein 2	protein-coding
hypo1470	chr16:18880002-18890000	intron (NM_015092, intron 13 of 62)	NM_015092	23049	NM_015092	ENSG00000157106	SMG1	SMG1, nonsense mediated mRNA decay associated PI3K related kinase	protein-coding
hypo1471	chr4:157520002-157530000	Intergenic	NR_036641	56034	NM_016205	ENSG00000145431	PDGFC	platelet derived growth factor C	protein-coding
hypo1472	chr3:32150002-32160000	intron (NM_015141, intron 1 of 7)	NM_015141	23171	NM_015141	ENSG00000152642	GPD1L	glycerol-3-phosphate dehydrogenase 1-like	protein-coding
hypo1473	chr4:31000002-31010000	intron (NM_001173523, intron 2 of 2)	NR_125935	102723778	NR_125935	ENSG00000251182	LOC102723778	uncharacterized LOC102723778	ncRNA
hypo1474	chr13:56420002-56430000	Intergenic	NR_049804	100846996	NR_049804	ENSG00000264387	MIR5007	microRNA 5007	ncRNA
hypo1475	chr3:17480002-17490000	intron (NM_014744, intron 3 of 21)	NM_001134381	9779	NM_014744	ENSG00000131374	TBC1D5	TBC1 domain family member 5	protein-coding
hypo1476	chr12:117870002-117880000	Intergenic	NM_001204218	4842	NM_000620	ENSG00000089250	NOS1	nitric oxide synthase 1	protein-coding
hypo1477	chr9:89650002-89660000	intron (NR_027471, intron 1 of 1)	NR_027471	440173	NR_027471	ENSG00000269994	LOC440173	uncharacterized LOC440173	ncRNA
hypo1478	chr15:60190002-60200000	Intergenic	NM_012182	27023	NM_012182	ENSG00000171956	FOXB1	forkhead box B1	protein-coding
hypo1479	chr12:115140002-115150000	Intergenic	NM_005996	6926	NM_005996	ENSG00000135111	TBX3	T-box 3	protein-coding
hypo148	chr9:137140002-137150000	Intergenic	NM_002957	6256	NM_002957	ENSG00000186350	RXRA	retinoid X receptor alpha	protein-coding
hypo1480	chr14:102650002-102660000	intron (NM_001242418, intron 1 of 2)	NM_144574	91833	NM_144574	ENSG00000140153	WDR20	WD repeat domain 20	protein-coding
hypo1481	chr20:11300002-11310000	Intergenic	NR_038972	339593	NR_038972		LOC339593	uncharacterized LOC339593	ncRNA
hypo1482	chr6:75950002-75960000	Intergenic	NR_029466	1347	NM_001865	ENSG00000112695	COX7A2	cytochrome c oxidase subunit 7A2	protein-coding
hypo1483	chr3:21670002-21680000	intron (NM_024697, intron 2 of 7)	NR_046731	100874216	NR_046731	ENSG00000225542	ZNF385D-AS1	ZNF385D antisense RNA 1	ncRNA
hypo1484	chr3:152440002-152450000	Intergenic	NM_002563	5028	NM_002563	ENSG00000169860	P2RY1	purinergic receptor P2Y1	protein-coding
hypo1485	chr12:27680002-27690000	intron (NM_001198916, intron 1 of 27)	NM_003622	8496	NM_003622	ENSG00000110841	PPFIBP1	PPFIA binding protein 1	protein-coding
hypo1486	chr17:7590002-7600000	intron (NM_001143990, intron 4 of 10)	NM_018081	55135	NM_018081	ENSG00000141499	WRAP53	WD repeat containing antisense to TP53	protein-coding
hypo1487	chr2:227950002-227960000	intron (NM_000092, intron 20 of 47)	NM_000092	1286	NM_000092	ENSG00000081052	COL4A4	collagen type IV alpha 4 chain	protein-coding
hypo1488	chr15:75230002-75240000	Intergenic	NM_004255	9377	NM_004255	ENSG00000178741	COX5A	cytochrome c oxidase subunit 5A	protein-coding
hypo1489	chr5:113010002-113020000	Intergenic	NM_022828	64848	NM_022828	ENSG00000047188	YTHDC2	YTH domain containing 2	protein-coding
hypo149	chr15:34650002-34660000	exon (NM_153613, exon 8 of 14)	NM_153613	254531	NM_153613	ENSG00000176454	LPCAT4	lysophosphatidylcholine acyltransferase 4	protein-coding
hypo1490	chr3:78450002-78460000	Intergenic	NM_133631	6091	NM_002941	ENSG00000169855	ROBO1	roundabout guidance receptor 1	protein-coding
hypo1491	chr2:65020002-65030000	Intergenic	NR_110224	101927438	NR_110224	ENSG00000234572	LINC01800	long intergenic non-protein coding RNA 1800	ncRNA
hypo1492	chr5:83930002-83940000	Intergenic	NM_001278642	10085	NM_005711	ENSG00000164176	EDIL3	EGF like repeats and discoidin domains 3	protein-coding
hypo1493	chr14:51260002-51270000	intron (NM_182944, intron 4 of 29)	NR_135258	105370489	NR_135258	ENSG00000258843	LOC105370489	uncharacterized LOC105370489	ncRNA
hypo1494	chr10:35970002-35980000	Intergenic	NM_031866	8325	NM_031866	ENSG00000177283	FZD8	frizzled class receptor 8	protein-coding
hypo1495	chr11:83810002-83820000	intron (NM_001142700, intron 2 of 19)	NM_001142700	1740	NM_001364	ENSG00000150672	DLG2	discs large MAGUK scaffold protein 2	protein-coding
hypo1496	chr14:27340002-27350000	intron (NR_110041, intron 3 of 3)	NR_110041	101927081	NR_110041	ENSG00000257612	MIR4307HG	MIR4307 host gene	ncRNA
hypo1497	chr8:95880002-95890000	intron (NR_073445, intron 22 of 27)	NM_057749	9134	NM_004702	ENSG00000175305	CCNE2	cyclin E2	protein-coding
hypo1498	chr1:47770002-47780000	intron (NM_001282938, intron 3 of 18)	NM_003035	6491	NM_003035	ENSG00000123473	STIL	SCL/TAL1 interrupting locus	protein-coding
hypo1499	chr5:53380002-53390000	intron (NM_019087, intron 4 of 4)	NR_039664	100616233	NR_039664	ENSG00000265421	MIR4459	microRNA 4459	ncRNA
hypo15	chr6:166690002-166700000	Intergenic	NM_175922	285800	NM_175922	ENSG00000176381	PRR18	proline rich 18	protein-coding
hypo150	chr17:78170002-78180000	intron (NM_001257970, intron 13 of 14)	NM_052819	79092	NM_024110	ENSG00000141527	CARD14	caspase recruitment domain family member 14	protein-coding
hypo1500	chr15:61740002-61750000	Intergenic	NM_134261	6095	NM_002943	ENSG00000069667	RORA	RAR related orphan receptor A	protein-coding
hypo1501	chr9:5090002-5100000	intron (NM_001322204, intron 19 of 21)	NM_001322204	3717	NM_004972	ENSG00000096968	JAK2	Janus kinase 2	protein-coding
hypo1502	chr10:26050002-26060000	Intergenic	NR_108068	101929052	NR_108067	ENSG00000280809	LINC00836	long intergenic non-protein coding RNA 836	ncRNA
hypo1503	chr18:66950002-66960000	Intergenic	NM_152721	220164	NM_152721	ENSG00000206052	DOK6	docking protein 6	protein-coding
hypo1504	chr13:32860002-32870000	intron (NM_023037, intron 59 of 60)	NM_001136571	646799	NM_001136571	ENSG00000189167	ZAR1L	zygote arrest 1-like	protein-coding
hypo1505	chr7:113480002-113490000	Intergenic	NM_002711	5506	NM_002711	ENSG00000154415	PPP1R3A	protein phosphatase 1 regulatory subunit 3A	protein-coding
hypo1506	chr12:108730002-108740000	Intergenic	NM_004072	1240	NM_004072	ENSG00000174600	CMKLR1	chemerin chemokine-like receptor 1	protein-coding
hypo1507	chr21:43200002-43210000	Intergenic	NM_020639	54101	NM_020639	ENSG00000183421	RIPK4	receptor interacting serine/threonine kinase 4	protein-coding
hypo1508	chr2:104580002-104590000	Intergenic	NR_037885	100287010	NR_037885		LOC100287010	uncharacterized LOC100287010	ncRNA
hypo1509	chr11:72160002-72170000	Intergenic	NM_001258394	81570	NM_030813	ENSG00000162129	CLPB	ClpB homolog, mitochondrial AAA ATPase chaperonin	protein-coding
hypo151	chr16:68930002-68940000	intron (NM_024562, intron 8 of 17)	NM_024562	79613	NM_024562	ENSG00000103047	TANGO6	transport and golgi organization 6 homolog	protein-coding
hypo1510	chr16:9900002-9910000	intron (NM_000833, intron 11 of 13)	NR_126349	104266959	NR_126349	ENSG00000261075	LINC01195	long intergenic non-protein coding RNA 1195	ncRNA
hypo1511	chr6:168340002-168350000	intron (NM_001291964, intron 25 of 32)	NM_001129895	100128124	NM_001129895		HGC6.3	uncharacterized LOC100128124	protein-coding
hypo1512	chr10:5090002-5100000	intron (NM_001253908, intron 1 of 8)	NM_001253908	8644	NM_003739	ENSG00000196139	AKR1C3	aldo-keto reductase family 1 member C3	protein-coding
hypo1513	chr8:14280002-14290000	intron (NM_001322881, intron 2 of 6)	NR_029875	494332	NR_029875	ENSG00000199127	MIR383	microRNA 383	ncRNA
hypo1514	chr2:44580002-44590000	intron (NM_001171617, intron 1 of 13)	NM_001042386	9581	NM_006036	ENSG00000138078	PREPL	prolyl endopeptidase-like	protein-coding
hypo1515	chr3:184260002-184270000	intron (NR_046593, intron 1 of 1)	NR_046593	100874079	NR_046593	ENSG00000230215	LINC01840	long intergenic non-protein coding RNA 1840	ncRNA
hypo1516	chr7:14880002-14890000	Intergenic	NM_004080	1607	NM_004080	ENSG00000136267	DGKB	diacylglycerol kinase beta	protein-coding
hypo1517	chr8:16550002-16560000	Intergenic	NM_019851	26281	NM_019851	ENSG00000078579	FGF20	fibroblast growth factor 20	protein-coding
hypo1518	chr8:129130002-129140000	Intergenic	NR_031613	100302281	NR_031613	ENSG00000221261	MIR1208	microRNA 1208	ncRNA
hypo1519	chr10:42930002-42940000	intron (NR_103829, intron 3 of 8)	NR_103829	414194	NR_103829	ENSG00000182632	CCNYL2	cyclin Y-like 2 (pseudogene)	pseudo
hypo152	chr1:41350002-41360000	Intergenic	NM_133467	163732	NM_133467	ENSG00000179862	CITED4	Cbp/p300 interacting transactivator with Glu/Asp rich carboxy-terminal domain 4	protein-coding
hypo1520	chr2:37920002-37930000	Intergenic	NM_001270436	10602	NM_006449	ENSG00000163171	CDC42EP3	CDC42 effector protein 3	protein-coding
hypo1521	chr7:123050002-123060000	Intergenic	NR_104244	154865	NM_178827	ENSG00000164675	IQUB	IQ motif and ubiquitin domain containing	protein-coding
hypo1522	chr17:42270002-42280000	exon (NM_001098833, exon 2 of 12)	NM_001098833	56970	NM_020218	ENSG00000087152	ATXN7L3	ataxin 7 like 3	protein-coding
hypo1523	chr1:44430002-44440000	promoter-TSS (NM_001319169)	NM_001384	1802	NM_001384	ENSG00000132768	DPH2	DPH2 homolog	protein-coding
hypo1524	chrX:23030002-23040000	intron (NR_073010, intron 3 of 11)	NM_182699	168400	NM_182699	ENSG00000184735	DDX53	DEAD-box helicase 53	protein-coding
hypo1525	chrX:150620002-150630000	Intergenic	NR_135614	105377213	NR_135614	ENSG00000214915	LOC105377213	uncharacterized LOC105377213	ncRNA
hypo1526	chr9:132680002-132690000	intron (NM_015033, intron 10 of 16)	NR_106914	102466750	NR_106914	ENSG00000276124	MIR6855	microRNA 6855	ncRNA
hypo1527	chr11:5370002-5380000	intron (NM_001005567, intron 1 of 4)	NM_001004750	390058	NM_001004750	ENSG00000176239	OR51B6	olfactory receptor family 51 subfamily B member 6	protein-coding
hypo1528	chr11:127050002-127060000	Intergenic	NR_120580	101929497	NR_120580	ENSG00000273409	LOC101929497	uncharacterized LOC101929497	ncRNA
hypo1529	chr17:22210002-22220000	Intergenic	NM_001190452	100462977	NM_001190452	ENSG00000256618	MTRNR2L1	MT-RNR2-like 1	protein-coding
hypo153	chr20:12730002-12740000	Intergenic	NR_109872	102606466	NR_109872		LOC102606466	uncharacterized LOC102606466	ncRNA
hypo1530	chr12:97420002-97430000	Intergenic	NM_001135175	121441	NM_152905	ENSG00000139350	NEDD1	neural precursor cell expressed, developmentally down-regulated 1	protein-coding
hypo1531	chr12:81510002-81520000	intron (NM_001330242, intron 2 of 15)	NR_039848	100616133	NR_039848	ENSG00000265227	MIR4699	microRNA 4699	ncRNA
hypo1532	chr20:62240002-62250000	intron (NM_012384, intron 2 of 9)	NM_012384	26205	NM_012384	ENSG00000101216	GMEB2	glucocorticoid modulatory element binding protein 2	protein-coding
hypo1533	chr9:103050002-103060000	exon (NM_001318381, exon 15 of 18)	NM_001161584	54881	NM_017746	ENSG00000136891	TEX10	testis expressed 10	protein-coding
hypo1534	chr6:72620002-72630000	intron (NM_014989, intron 1 of 33)	NM_014989	22999	NM_014989	ENSG00000079841	RIMS1	regulating synaptic membrane exocytosis 1	protein-coding
hypo1535	chrX:40340002-40350000	Intergenic	NM_005765	10159	NM_005765	ENSG00000182220	ATP6AP2	ATPase H+ transporting accessory protein 2	protein-coding
hypo1536	chr10:72720002-72730000	Intergenic	NR_134313	105378349	NR_134313	ENSG00000259267	LOC105378349	uncharacterized LOC105378349	ncRNA
hypo1537	chr7:145960002-145970000	intron (NM_014141, intron 1 of 23)	NM_014141	26047	NM_014141	ENSG00000174469	CNTNAP2	contactin associated protein-like 2	protein-coding
hypo1538	chr8:72570002-72580000	Intergenic	NR_033652	100132891	NR_033651	ENSG00000235531	MSC-AS1	MSC antisense RNA 1	ncRNA
hypo1539	chr20:41900002-41910000	Intergenic	NM_007050	11122	NM_007050	ENSG00000196090	PTPRT	protein tyrosine phosphatase, receptor type T	protein-coding
hypo154	chr13:96340002-96350000	intron (NM_006260, intron 1 of 11)	NM_006260	5611	NM_006260	ENSG00000102580	DNAJC3	DnaJ heat shock protein family (Hsp40) member C3	protein-coding
hypo1540	chr6:152250002-152260000	intron (NM_001122740, intron 4 of 8)	NM_001328100	2099	NM_000125	ENSG00000091831	ESR1	estrogen receptor 1	protein-coding
hypo1541	chr6:17590002-17600000	Intergenic	NM_016255	51439	NM_016255	ENSG00000137414	FAM8A1	family with sequence similarity 8 member A1	protein-coding
hypo1542	chr1:118860002-118870000	Intergenic	NM_206996	200162	NM_206996	ENSG00000155761	SPAG17	sperm associated antigen 17	protein-coding
hypo1543	chr3:108170002-108180000	intron (NM_014981, intron 20 of 41)	NM_014981	22989	NM_014981	ENSG00000144821	MYH15	myosin heavy chain 15	protein-coding
hypo1544	chr7:32720002-32730000	intron (NR_036680, intron 2 of 16)	NR_036680	100129460	NR_036680		DPY19L1P1	DPY19L1 pseudogene 1	pseudo
hypo1545	chrX:24760002-24770000	intron (NM_016937, intron 24 of 36)	NR_003007	677773	NR_003007	ENSG00000251869	SCARNA23	small Cajal body-specific RNA 23	ncRNA
hypo1546	chr16:80960002-80970000	Intergenic	NR_131948	100996425	NR_131947	ENSG00000260896	PRCAT47	prostate cancer-associated 47	ncRNA
hypo1547	chr4:125390002-125400000	Intergenic	NR_110838	101927087	NR_110838	ENSG00000261083	LOC101927087	uncharacterized LOC101927087	ncRNA
hypo1548	chr1:200370002-200380000	3' UTR (NM_001281293, exon 2 of 2)	NM_001281293	23528	NM_012482	ENSG00000162702	ZNF281	zinc finger protein 281	protein-coding
hypo1549	chr21:27980002-27990000	Intergenic	NR_135472	116159	NM_052954	ENSG00000166265	CYYR1	cysteine and tyrosine rich 1	protein-coding
hypo155	chr6:6620002-6630000	intron (NM_004271, intron 1 of 4)	NR_026970	285780	NM_173675	ENSG00000216863	LY86-AS1	LY86 antisense RNA 1	ncRNA
hypo1550	chr2:33450002-33460000	intron (NM_001166266, intron 5 of 28)	NM_001166266	4052	NM_000627	ENSG00000049323	LTBP1	latent transforming growth factor beta binding protein 1	protein-coding
hypo1551	chr8:115590002-115600000	Intergenic	NM_001282902	7227	NM_014112	ENSG00000104447	TRPS1	transcriptional repressor GATA binding 1	protein-coding
hypo1552	chrX:49580002-49590000	Intergenic	NM_001318877	9506	NM_007003	ENSG00000101951	PAGE4	PAGE family member 4	protein-coding
hypo1553	chr8:133430002-133440000	intron (NM_004519, intron 1 of 14)	NM_001204824	3786	NM_004519	ENSG00000184156	KCNQ3	potassium voltage-gated channel subfamily Q member 3	protein-coding
hypo1554	chr16:80830002-80840000	intron (NM_152342, intron 1 of 6)	NM_152342	124359	NM_152342	ENSG00000166446	CDYL2	chromodomain Y-like 2	protein-coding
hypo1555	chr3:78370002-78380000	Intergenic	NM_133631	6091	NM_002941	ENSG00000169855	ROBO1	roundabout guidance receptor 1	protein-coding
hypo1556	chr19:38380002-38390000	exon (NM_001291088, exon 4 of 6)	NM_031951	83889	NM_031951	ENSG00000171804	WDR87	WD repeat domain 87	protein-coding
hypo1557	chr12:119180002-119190000	Intergenic	NR_134999	105370014	NR_134998	ENSG00000256750	LOC105370014	uncharacterized LOC105370014	ncRNA
hypo1558	chr8:23660002-23670000	Intergenic	NM_003155	6781	NM_003155	ENSG00000159167	STC1	stanniocalcin 1	protein-coding
hypo1559	chr1:65330002-65340000	exon (NM_001321855, exon 7 of 26)	NM_001321857	3716	NM_002227	ENSG00000162434	JAK1	Janus kinase 1	protein-coding
hypo156	chr4:5670002-5680000	intron (NM_001166136, intron 7 of 21)	NM_147127	132884	NM_147127	ENSG00000173040	EVC2	EvC ciliary complex subunit 2	protein-coding
hypo1560	chr16:59590002-59600000	Intergenic	NR_028471	644649	NR_028471		APOOP5	apolipoprotein O pseudogene 5	pseudo
hypo1561	chr3:48340002-48350000	Intergenic	NM_001308426	10201	NM_005793	ENSG00000172113	NME6	NME/NM23 nucleoside diphosphate kinase 6	protein-coding
hypo1562	chr18:32760002-32770000	Intergenic	NM_001135178	84307	NM_032347	ENSG00000186812	ZNF397	zinc finger protein 397	protein-coding
hypo1563	chr1:186080002-186090000	intron (NM_031935, intron 75 of 106)	NM_005807	10216	NM_005807	ENSG00000116690	PRG4	proteoglycan 4	protein-coding
hypo1564	chr16:1280002-1290000	Intergenic	NM_024164	64499	NM_024164	ENSG00000197253	TPSB2	tryptase beta 2 (gene/pseudogene)	protein-coding
hypo1565	chr7:103380002-103390000	intron (NM_173054, intron 6 of 63)	NM_173054	5649	NM_005045	ENSG00000189056	RELN	reelin	protein-coding
hypo1566	chr10:47570002-47580000	Intergenic	NR_103828	100996567	NR_103827		ANTXRLP1	anthrax toxin receptor-like pseudogene 1	pseudo
hypo1567	chr16:33360002-33370000	Intergenic	NR_033866	390705	NR_033866		LOC390705	protein phosphatase 2 regulatory subunit B'', beta pseudogene	pseudo
hypo1568	chr18:53930002-53940000	Intergenic	NR_040025	100505474	NR_040025	ENSG00000267712	LINC01539	long intergenic non-protein coding RNA 1539	ncRNA
hypo1569	chr8:42170002-42180000	intron (NR_040009, intron 11 of 21)	NM_002690	5423	NM_002690	ENSG00000070501	POLB	DNA polymerase beta	protein-coding
hypo157	chr21:45330002-45340000	intron (NM_020132, intron 2 of 9)	NM_001037553	56894	NM_020132	ENSG00000160216	AGPAT3	1-acylglycerol-3-phosphate O-acyltransferase 3	protein-coding
hypo1570	chr4:166150002-166160000	intron (NM_001331024, intron 3 of 13)	NM_001161521	11275	NM_007246	ENSG00000109466	KLHL2	kelch like family member 2	protein-coding
hypo1571	chr14:57400002-57410000	Intergenic	NR_029385	100309464	NR_029385	ENSG00000248550	OTX2-AS1	OTX2 antisense RNA 1 (head to head)	ncRNA
hypo1572	chr8:116620002-116630000	intron (NM_001330599, intron 2 of 5)	NM_001282902	7227	NM_014112	ENSG00000104447	TRPS1	transcriptional repressor GATA binding 1	protein-coding
hypo1573	chr4:76560002-76570000	Intergenic	NM_003948	8999	NM_003948	ENSG00000138769	CDKL2	cyclin dependent kinase like 2	protein-coding
hypo1574	chr6:70580002-70590000	intron (NM_001858, intron 1 of 50)	NM_001858	1310	NM_001858	ENSG00000082293	COL19A1	collagen type XIX alpha 1 chain	protein-coding
hypo1575	chr12:89890002-89900000	intron (NM_172240, intron 2 of 11)	NM_003774	8693	NM_003774	ENSG00000257594	GALNT4	polypeptide N-acetylgalactosaminyltransferase 4	protein-coding
hypo1576	chr19:47740002-47750000	Intergenic	NM_001127240	27113	NM_014417	ENSG00000105327	BBC3	BCL2 binding component 3	protein-coding
hypo1577	chr11:71030002-71040000	Intergenic	NM_012309	22941	NM_012309	ENSG00000162105	SHANK2	SH3 and multiple ankyrin repeat domains 2	protein-coding
hypo1578	chr20:12420002-12430000	Intergenic	NR_109872	102606466	NR_109872		LOC102606466	uncharacterized LOC102606466	ncRNA
hypo1579	chr5:124110002-124120000	Intergenic	NM_020747	57507	NM_020747	ENSG00000168916	ZNF608	zinc finger protein 608	protein-coding
hypo158	chr20:60240002-60250000	intron (NM_001252339, intron 1 of 14)	NM_001252339	1002	NM_001794	ENSG00000179242	CDH4	cadherin 4	protein-coding
hypo1580	chr6:15030002-15040000	Intergenic	NM_004973	3720	NM_004973	ENSG00000008083	JARID2	jumonji and AT-rich interaction domain containing 2	protein-coding
hypo1581	chr2:62050002-62060000	intron (NM_032180, intron 4 of 5)	NR_037710	84140	NM_032180	ENSG00000170264	FAM161A	family with sequence similarity 161 member A	protein-coding
hypo1582	chr14:19500002-19510000	Intergenic	NM_001005356	404785	NM_207513	ENSG00000187537	POTEG	POTE ankyrin domain family member G	protein-coding
hypo1583	chr7:80860002-80870000	Intergenic	NM_006379	10512	NM_006379	ENSG00000075223	SEMA3C	semaphorin 3C	protein-coding
hypo1584	chr10:121580002-121590000	intron (NM_014937, intron 19 of 19)	NM_001243194	22876	NM_014937	ENSG00000198825	INPP5F	inositol polyphosphate-5-phosphatase F	protein-coding
hypo1585	chr9:9140002-9150000	intron (NM_002839, intron 10 of 45)	NR_121600	101929407	NR_121599		PTPRD-AS1	PTPRD antisense RNA 1	ncRNA
hypo1586	chr3:107800002-107810000	intron (NM_001777, intron 1 of 10)	NM_198793	961	NM_001777	ENSG00000196776	CD47	CD47 molecule	protein-coding
hypo1587	chr6:111650002-111660000	intron (NM_002912, intron 23 of 32)	NM_153369	91749	NM_153369	ENSG00000173214	MFSD4B	major facilitator superfamily domain containing 4B	protein-coding
hypo1588	chr9:138750002-138760000	intron (NM_015447, intron 4 of 16)	NM_015447	157922	NM_015447	ENSG00000130559	CAMSAP1	calmodulin regulated spectrin associated protein 1	protein-coding
hypo1589	chr4:137430002-137440000	Intergenic	NR_103763	100507528	NR_103762	ENSG00000248330	LINC00613	long intergenic non-protein coding RNA 613	ncRNA
hypo159	chr17:6260002-6270000	Intergenic	NM_001285402	23746	NM_014336	ENSG00000129221	AIPL1	aryl hydrocarbon receptor interacting protein like 1	protein-coding
hypo1590	chr5:6620002-6630000	intron (NM_001193455, intron 3 of 17)	NM_001324323	6715	NM_001047	ENSG00000145545	SRD5A1	steroid 5 alpha-reductase 1	protein-coding
hypo1591	chr11:90690002-90700000	Intergenic	NR_031663	100302228	NR_031663	ENSG00000221586	MIR1261	microRNA 1261	ncRNA
hypo1592	chr14:87750002-87760000	Intergenic	NR_038445	283585	NR_038445	ENSG00000258804	LINC01148	long intergenic non-protein coding RNA 1148	ncRNA
hypo1593	chr14:55240002-55250000	intron (NM_015589, intron 10 of 11)	NM_001161577	23034	NM_015589	ENSG00000020577	SAMD4A	sterile alpha motif domain containing 4A	protein-coding
hypo1594	chr6:19690002-19700000	Intergenic	NR_134651	100506885	NR_134649	ENSG00000228412	LOC100506885	uncharacterized LOC100506885	ncRNA
hypo1595	chr10:85840002-85850000	Intergenic	NM_014394	27069	NM_014394	ENSG00000165678	GHITM	growth hormone inducible transmembrane protein	protein-coding
hypo1596	chr9:16860002-16870000	intron (NM_001317940, intron 1 of 5)	NM_001317940	54796	NM_017637	ENSG00000173068	BNC2	basonuclin 2	protein-coding
hypo1597	chrX:139800002-139810000	intron (NR_104228, intron 2 of 3)	NR_104228	286411	NR_028344	ENSG00000203930	LINC00632	long intergenic non-protein coding RNA 632	ncRNA
hypo1598	chr9:16430002-16440000	intron (NM_001317940, intron 5 of 5)	NR_073471	100129385	NM_001271829	ENSG00000205549	C9orf92	chromosome 9 open reading frame 92	protein-coding
hypo1599	chr16:24120002-24130000	intron (NM_212535, intron 8 of 16)	NR_106996	102466247	NR_106996	ENSG00000274466	MIR1273H	microRNA 1273h	ncRNA
hypo16	chr17:30560002-30570000	Intergenic	NM_001330181	162494	NM_138328	ENSG00000141314	RHBDL3	rhomboid like 3	protein-coding
hypo160	chr12:108580002-108590000	intron (NM_001304447, intron 2 of 9)	NM_001304447	9671	NM_014653	ENSG00000075035	WSCD2	WSC domain containing 2	protein-coding
hypo1600	chrX:4630002-4640000	Intergenic	NR_110390	101928201	NR_110390	ENSG00000236513	LOC101928201	uncharacterized LOC101928201	ncRNA
hypo1601	chr16:52830002-52840000	Intergenic	NR_033920	643714	NR_033920	ENSG00000249231	CASC16	cancer susceptibility candidate 16 (non-protein coding)	ncRNA
hypo1602	chr4:126370002-126380000	intron (NM_024582, intron 9 of 16)	NR_031746	100302267	NR_031746	ENSG00000283550	MIR2054	microRNA 2054	ncRNA
hypo1603	chr3:143620002-143630000	Intergenic	NM_173653	285195	NM_173653	ENSG00000181804	SLC9A9	solute carrier family 9 member A9	protein-coding
hypo1604	chrX:8110002-8120000	Intergenic	NR_030380	723779	NR_030380	ENSG00000207628	MIR651	microRNA 651	ncRNA
hypo1605	chr16:88280002-88290000	Intergenic	NR_110944	101928880	NR_110944	ENSG00000260420	LOC101928880	uncharacterized LOC101928880	ncRNA
hypo1606	chr10:10920002-10930000	intron (NM_001326323, intron 3 of 17)	NR_024410	254312	NR_015413	ENSG00000229240	LINC00710	long intergenic non-protein coding RNA 710	ncRNA
hypo1607	chr4:58890002-58900000	Intergenic	NR_133943	105377671	NR_133943	ENSG00000250340	LOC105377671	uncharacterized LOC105377671	ncRNA
hypo1608	chrX:73390002-73400000	intron (NR_028379, intron 5 of 6)	NR_030398	693122	NR_030398	ENSG00000202566	MIR421	microRNA 421	ncRNA
hypo1609	chr16:20170002-20180000	Intergenic	NM_001318483	124274	NM_001002911	ENSG00000180269	GPR139	G protein-coupled receptor 139	protein-coding
hypo161	chr14:64790002-64800000	intron (NM_001291712, intron 2 of 13)	NM_001291712	2100	NM_001437	ENSG00000140009	ESR2	estrogen receptor 2	protein-coding
hypo1610	chr12:29800002-29810000	intron (NM_175861, intron 5 of 17)	NM_001193451	83857	NM_175861	ENSG00000133687	TMTC1	transmembrane and tetratricopeptide repeat containing 1	protein-coding
hypo1611	chr3:111290002-111300000	intron (NM_005816, intron 3 of 13)	NM_024508	79413	NM_024508	ENSG00000177494	ZBED2	zinc finger BED-type containing 2	protein-coding
hypo1612	chr5:112210002-112220000	intron (NM_005669, intron 4 of 4)	NM_001204194	6728	NM_003135	ENSG00000153037	SRP19	signal recognition particle 19	protein-coding
hypo1613	chr6:70260002-70270000	Intergenic	NM_018368	55788	NM_018368	ENSG00000168216	LMBRD1	LMBR1 domain containing 1	protein-coding
hypo1614	chr10:112410002-112420000	intron (NM_001134363, intron 1 of 13)	NM_001134363	282996	NM_001134363	ENSG00000203867	RBM20	RNA binding motif protein 20	protein-coding
hypo1615	chr2:195000002-195010000	Intergenic	NR_110222	101927406	NR_110222	ENSG00000225539	LINC01821	long intergenic non-protein coding RNA 1821	ncRNA
hypo1616	chr22:39030002-39040000	intron (NM_001013647, intron 4 of 16)	NM_001013647	646851	NM_001013647	ENSG00000184949	FAM227A	family with sequence similarity 227 member A	protein-coding
hypo1617	chr3:175990002-176000000	Intergenic	NR_107017	102465858	NR_107017	ENSG00000283333	MIR7977	microRNA 7977	ncRNA
hypo1618	chr16:68320002-68330000	intron (NM_003983, intron 5 of 10)	NM_032178	84138	NM_032178	ENSG00000103061	SLC7A6OS	solute carrier family 7 member 6 opposite strand	protein-coding
hypo1619	chr12:42450002-42460000	Intergenic	NM_001099650	283464	NM_173601	ENSG00000151233	GXYLT1	glucoside xylosyltransferase 1	protein-coding
hypo162	chr13:19790002-19800000	Intergenic	NR_126054	101928697	NR_126054		LOC101928697	uncharacterized LOC101928697	ncRNA
hypo1620	chrX:125600002-125610000	Intergenic	NM_178470	139170	NM_178470	ENSG00000198889	DCAF12L1	DDB1 and CUL4 associated factor 12 like 1	protein-coding
hypo1621	chr18:2990002-3000000	intron (NM_014646, intron 1 of 19)	NM_014646	9663	NM_014646	ENSG00000101577	LPIN2	lipin 2	protein-coding
hypo1622	chr11:27240002-27250000	Intergenic	NR_125766	103695435	NR_125766	ENSG00000254560	BBOX1-AS1	BBOX1 antisense RNA 1	ncRNA
hypo1623	chrX:48060002-48070000	Intergenic	NM_021015	6758	NM_021015	ENSG00000165583	SSX5	SSX family member 5	protein-coding
hypo1624	chr3:107410002-107420000	intron (NM_001276286, intron 3 of 16)	NM_001142568	56987	NM_020235	ENSG00000114439	BBX	BBX, HMG-box containing	protein-coding
hypo1625	chrX:137750002-137760000	intron (NM_001139500, intron 5 of 6)	NR_030229	574507	NR_030229	ENSG00000207800	MIR504	microRNA 504	ncRNA
hypo1626	chr2:9200002-9210000	Intergenic	NR_135601	129642	NM_138799	ENSG00000143797	MBOAT2	membrane bound O-acyltransferase domain containing 2	protein-coding
hypo1627	chr4:66380002-66390000	intron (NM_004439, intron 3 of 17)	NM_001318761	2044	NM_004439	ENSG00000145242	EPHA5	EPH receptor A5	protein-coding
hypo1628	chrX:108650002-108660000	intron (NM_001522, intron 8 of 19)	NM_001522	2986	NM_001522	ENSG00000101890	GUCY2F	guanylate cyclase 2F, retinal	protein-coding
hypo1629	chrX:56590002-56600000	Intergenic	NM_013444	29978	NM_013444	ENSG00000188021	UBQLN2	ubiquilin 2	protein-coding
hypo163	chr5:37880002-37890000	Intergenic	NM_001278094	100861519	NM_001278094	ENSG00000248587	GDNF-AS1	GDNF antisense RNA 1 (head to head)	protein-coding
hypo1630	chr9:6040002-6050000	Intergenic	NM_001243203	26953	NM_012416	ENSG00000137040	RANBP6	RAN binding protein 6	protein-coding
hypo1631	chr19:2710002-2720000	3' UTR (NM_145173, exon 2 of 2)	NM_145173	148252	NM_145173	ENSG00000176490	DIRAS1	DIRAS family GTPase 1	protein-coding
hypo1632	chr15:95760002-95770000	Intergenic	NR_034095	400456	NR_034095	ENSG00000248441	LINC01197	long intergenic non-protein coding RNA 1197	ncRNA
hypo1633	chr12:92420002-92430000	intron (NR_132341, intron 1 of 4)	NR_046159	256021	NM_001256373	ENSG00000257242	LINC01619	long intergenic non-protein coding RNA 1619	ncRNA
hypo1634	chr1:161170002-161180000	intron (NM_001166159, intron 2 of 12)	NM_001166159	4720	NM_004550	ENSG00000158864	NDUFS2	NADH:ubiquinone oxidoreductase core subunit S2	protein-coding
hypo1635	chr11:117300002-117310000	intron (NM_020693, intron 27 of 32)	NM_014956	22897	NM_014956	ENSG00000110274	CEP164	centrosomal protein 164	protein-coding
hypo1636	chr2:95790002-95800000	Intergenic	NM_001321996	64969	NM_031902	ENSG00000144029	MRPS5	mitochondrial ribosomal protein S5	protein-coding
hypo1637	chr14:34480002-34490000	Intergenic	NM_022073	112399	NM_022073	ENSG00000129521	EGLN3	egl-9 family hypoxia inducible factor 3	protein-coding
hypo1638	chr8:76210002-76220000	Intergenic	NR_103849	101805492	NR_103848		CASC9	cancer susceptibility candidate 9 (non-protein coding)	ncRNA
hypo1639	chr9:75250002-75260000	intron (NM_138691, intron 4 of 23)	NM_138691	117531	NM_138691	ENSG00000165091	TMC1	transmembrane channel like 1	protein-coding
hypo164	chr20:34660002-34670000	Intergenic	NM_001258331	2036	NM_012156	ENSG00000088367	EPB41L1	erythrocyte membrane protein band 4.1 like 1	protein-coding
hypo1640	chr18:32290002-32300000	intron (NM_001198941, intron 1 of 14)	NM_001198941	1837	NM_001390	ENSG00000134769	DTNA	dystrobrevin alpha	protein-coding
hypo1641	chr10:36450002-36460000	Intergenic	NR_110138	102578074	NR_110138	ENSG00000280719	PCAT5	prostate cancer associated transcript 5 (non-protein coding)	ncRNA
hypo1642	chr8:31480002-31490000	Intergenic	NM_013962	3084	NM_004495	ENSG00000157168	NRG1	neuregulin 1	protein-coding
hypo1643	chrX:135720002-135730000	TTS (NR_038461)	NR_038462	100128420	NR_038461	ENSG00000233093	LINC00892	long intergenic non-protein coding RNA 892	ncRNA
hypo1644	chr8:10690002-10700000	intron (NM_017884, intron 1 of 6)	NM_001284356	54984	NM_017884	ENSG00000254093	PINX1	PIN2/TERF1 interacting, telomerase inhibitor 1	protein-coding
hypo1645	chr5:164640002-164650000	Intergenic	NR_105065	102546299	NR_105065	ENSG00000241956	LOC102546299	uncharacterized LOC102546299	ncRNA
hypo1646	chr3:106050002-106060000	Intergenic	NR_135810	868	NM_170662	ENSG00000114423	CBLB	Cbl proto-oncogene B	protein-coding
hypo1647	chr16:6100002-6110000	intron (NM_018723, intron 1 of 15)	NM_001308117	54715	NM_018723	ENSG00000078328	RBFOX1	RNA binding protein, fox-1 homolog 1	protein-coding
hypo1648	chr11:60850002-60860000	Intergenic	NM_001346456	921	NM_014207	ENSG00000110448	CD5	CD5 molecule	protein-coding
hypo1649	chr6:6140002-6150000	3' UTR (NM_000129, exon 15 of 15)	NR_049863	100847034	NR_049863	ENSG00000283616	MIR5683	microRNA 5683	ncRNA
hypo165	chr16:5500002-5510000	Intergenic	NR_110902	101926950	NR_110902	ENSG00000260338	LINC01570	long intergenic non-protein coding RNA 1570	ncRNA
hypo1650	chrX:47000002-47010000	promoter-TSS (NM_001135998)	NM_001204468	8241	NM_005676	ENSG00000182872	RBM10	RNA binding motif protein 10	protein-coding
hypo1651	chr6:44870002-44880000	intron (NM_003599, intron 10 of 10)	NR_030313	693171	NR_030313	ENSG00000207769	MIR586	microRNA 586	ncRNA
hypo1652	chr12:17600002-17610000	Intergenic	NR_039770	100616279	NR_039770	ENSG00000283665	MIR3974	microRNA 3974	ncRNA
hypo1653	chr11:8110002-8120000	non-coding (NR_144485, exon 10 of 10)	NM_177972	7275	NM_003320	ENSG00000166402	TUB	tubby bipartite transcription factor	protein-coding
hypo1654	chr16:19670002-19680000	intron (NM_001300743, intron 23 of 27)	NR_130968	124152	NM_153208	ENSG00000174628	IQCK	IQ motif containing K	protein-coding
hypo1655	chr18:29200002-29210000	3' UTR (NM_004775, exon 9 of 9)	NM_000371	7276	NM_000371	ENSG00000118271	TTR	transthyretin	protein-coding
hypo1656	chr21:30490002-30500000	intron (NM_001286622, intron 6 of 8)	NM_001286620	56911	NM_020152	ENSG00000156265	MAP3K7CL	MAP3K7 C-terminal like	protein-coding
hypo1657	chr8:82690002-82700000	Intergenic	NM_152284	92421	NM_152284	ENSG00000164695	CHMP4C	charged multivesicular body protein 4C	protein-coding
hypo1658	chr1:64690002-64700000	intron (NM_152489, intron 6 of 8)	NM_152489	148581	NM_152489	ENSG00000177414	UBE2U	ubiquitin conjugating enzyme E2 U (putative)	protein-coding
hypo1659	chr4:190390002-190400000	Intergenic	NR_121679	101928971	NR_121679	ENSG00000250739	LINC01262	long intergenic non-protein coding RNA 1262	ncRNA
hypo166	chr10:76540002-76550000	Intergenic	NM_001256469	23522	NM_012330	ENSG00000156650	KAT6B	lysine acetyltransferase 6B	protein-coding
hypo1660	chr5:94870002-94880000	intron (NM_014639, intron 8 of 42)	NM_014639	9652	NM_014639	ENSG00000198677	TTC37	tetratricopeptide repeat domain 37	protein-coding
hypo1661	chr15:57530002-57540000	intron (NM_001306220, intron 4 of 11)	NM_207040	6938	NM_003205	ENSG00000140262	TCF12	transcription factor 12	protein-coding
hypo1662	chr9:44190002-44200000	Intergenic	NR_131213	105500239	NR_131213		XLOC_007697	uncharacterized LOC105500239	ncRNA
hypo1663	chr13:77770002-77780000	intron (NM_015057, intron 26 of 82)	NR_046716	100874212	NR_046716	ENSG00000236051	MYCBP2-AS1	MYCBP2 antisense RNA 1	ncRNA
hypo1664	chr2:33390002-33400000	intron (NM_001166266, intron 1 of 28)	NM_001166266	4052	NM_000627	ENSG00000049323	LTBP1	latent transforming growth factor beta binding protein 1	protein-coding
hypo1665	chr7:65940002-65950000	Intergenic	NR_134573	100289098	NR_134570	ENSG00000237310	GS1-124K5.4	uncharacterized LOC100289098	ncRNA
hypo1666	chr1:149020002-149030000	intron (NR_104217, intron 2 of 17).2	NR_104217	101929780	NR_104217	ENSG00000272150	NBPF25P	neuroblastoma breakpoint family member 25, pseudogene	pseudo
hypo1667	chr18:13440002-13450000	intron (NM_181481, intron 3 of 5)	NR_049822	100847080	NR_049822	ENSG00000266146	MIR5190	microRNA 5190	ncRNA
hypo1668	chr6:58280002-58290000	intron (NR_132995, intron 3 of 5)	NR_132994	106660612	NR_125727	ENSG00000215190	LINC00680	long intergenic non-protein coding RNA 680	ncRNA
hypo1669	chr6:22000002-22010000	intron (NR_015410, intron 6 of 11)	NR_034143	729177	NR_034143	ENSG00000260455	NBAT1	neuroblastoma associated transcript 1	ncRNA
hypo167	chr7:102610002-102620000	intron (NM_001111038, intron 6 of 18)	NM_001031692	10234	NM_005824	ENSG00000128606	LRRC17	leucine rich repeat containing 17	protein-coding
hypo1670	chr4:10990002-11000000	Intergenic	NM_052964	116449	NM_052964	ENSG00000109684	CLNK	cytokine dependent hematopoietic cell linker	protein-coding
hypo1671	chr11:46380002-46390000	intron (NM_001105540, intron 1 of 31)	NM_001105540	8525	NM_003646	ENSG00000149091	DGKZ	diacylglycerol kinase zeta	protein-coding
hypo1672	chr20:42810002-42820000	exon (NM_020433, exon 1 of 6)	NM_175913	57158	NM_020433	ENSG00000149596	JPH2	junctophilin 2	protein-coding
hypo1673	chr4:85140002-85150000	intron (NR_125909, intron 5 of 8)	NR_125909	101928978	NR_125909	ENSG00000250546	LOC101928978	uncharacterized LOC101928978	ncRNA
hypo1674	chr7:12010002-12020000	Intergenic	NM_015204	221981	NM_015204	ENSG00000005108	THSD7A	thrombospondin type 1 domain containing 7A	protein-coding
hypo1675	chr6:38010002-38020000	intron (NM_021943, intron 2 of 5)	NM_021943	60685	NM_021943	ENSG00000156639	ZFAND3	zinc finger AN1-type containing 3	protein-coding
hypo1676	chr11:48660002-48670000	Intergenic	NM_001005512	403253	NM_001005512	ENSG00000237388	OR4A47	olfactory receptor family 4 subfamily A member 47	protein-coding
hypo1677	chr11:99910002-99920000	intron (NM_175566, intron 6 of 21)	NM_175566	53942	NM_014361	ENSG00000149972	CNTN5	contactin 5	protein-coding
hypo1678	chr5:41010002-41020000	intron (NM_173489, intron 29 of 41)	NM_173489	133558	NM_173489	ENSG00000171495	MROH2B	maestro heat like repeat family member 2B	protein-coding
hypo1679	chr7:153710002-153720000	intron (NM_001039350, intron 1 of 25)	NM_130797	1804	NM_001936	ENSG00000130226	DPP6	dipeptidyl peptidase like 6	protein-coding
hypo168	chr5:76470002-76480000	Intergenic	NM_003719	8622	NM_003719	ENSG00000113231	PDE8B	phosphodiesterase 8B	protein-coding
hypo1680	chr5:140950002-140960000	intron (NM_001079812, intron 13 of 26)	NR_038333	100505658	NR_038333	ENSG00000246422	LOC100505658	uncharacterized LOC100505658	ncRNA
hypo1681	chr6:91750002-91760000	Intergenic	NM_145333	6885	NM_003188	ENSG00000135341	MAP3K7	mitogen-activated protein kinase kinase kinase 7	protein-coding
hypo1682	chr4:187230002-187240000	intron (NR_033900, intron 1 of 3)	NM_000128	2160	NM_000128	ENSG00000088926	F11	coagulation factor XI	protein-coding
hypo1683	chr2:132570002-132580000	Intergenic	NM_214461	408029	NM_214461		C2orf27B	chromosome 2 open reading frame 27B	protein-coding
hypo1684	chr13:53710002-53720000	intron (NR_125788, intron 4 of 4)	NR_125788	102723875	NR_125788		LINC01065	long intergenic non-protein coding RNA 1065	ncRNA
hypo1685	chr13:44600002-44610000	TTS (NR_026955)	NR_026955	121838	NR_026955		LINC00284	long intergenic non-protein coding RNA 284	ncRNA
hypo1686	chr17:10430002-10440000	exon (NM_001100112, exon 22 of 40)	NM_005963	4619	NM_005963	ENSG00000109061	MYH1	myosin heavy chain 1	protein-coding
hypo1687	chr3:39910002-39920000	intron (NR_104316, intron 1 of 16)	NM_015460	25924	NM_015460	ENSG00000170011	MYRIP	myosin VIIA and Rab interacting protein	protein-coding
hypo1688	chr2:161650002-161660000	Intergenic	NM_016836	5937	NM_002897	ENSG00000153250	RBMS1	RNA binding motif single stranded interacting protein 1	protein-coding
hypo1689	chr13:106080002-106090000	Intergenic	NM_001161814	267012	NM_172370	ENSG00000182346	DAOA	D-amino acid oxidase activator	protein-coding
hypo169	chr5:141770002-141780000	intron (NR_120664, intron 3 of 3)	NR_120664	101926941	NR_120664	ENSG00000231185	LOC101926941	uncharacterized LOC101926941	ncRNA
hypo1690	chr12:71520002-71530000	intron (NM_004616, intron 7 of 8)	NM_004616	7103	NM_004616	ENSG00000127324	TSPAN8	tetraspanin 8	protein-coding
hypo1691	chr13:115000002-115010000	intron (NM_001078645, intron 5 of 17)	NM_001318518	8881	NM_003903	ENSG00000130177	CDC16	cell division cycle 16	protein-coding
hypo1692	chrX:69530002-69540000	intron (NM_012310, intron 7 of 30)	NM_012310	24137	NM_012310	ENSG00000090889	KIF4A	kinesin family member 4A	protein-coding
hypo1693	chr8:94180002-94190000	Intergenic	NM_001242668	389676	NM_001242668		C8orf87	chromosome 8 open reading frame 87	protein-coding
hypo1694	chr1:190010002-190020000	Intergenic	NM_001317188	339479	NM_199051	ENSG00000162670	BRINP3	BMP/retinoic acid inducible neural specific 3	protein-coding
hypo1695	chrX:67650002-67660000	Intergenic	NM_002547	4983	NM_002547	ENSG00000079482	OPHN1	oligophrenin 1	protein-coding
hypo1696	chr20:48160002-48170000	intron (NM_000961, intron 2 of 9)	NM_000961	5740	NM_000961	ENSG00000124212	PTGIS	prostaglandin I2 synthase	protein-coding
hypo1697	chr2:109140002-109150000	intron (NR_135290, intron 1 of 2)	NR_135290	644903	NM_032658	ENSG00000214184	GCC2-AS1	GCC2 antisense RNA 1	ncRNA
hypo1698	chrX:3250002-3260000	intron (NM_015419, intron 2 of 6)	NM_015419	25878	NM_015419	ENSG00000101825	MXRA5	matrix remodeling associated 5	protein-coding
hypo1699	chr19:15140002-15150000	Intergenic	NM_012114	23581	NM_012114	ENSG00000105141	CASP14	caspase 14	protein-coding
hypo17	chr2:222470002-222480000	Intergenic	NM_001304536	2043	NM_004438	ENSG00000116106	EPHA4	EPH receptor A4	protein-coding
hypo170	chr19:39990002-40000000	intron (NM_016941, intron 5 of 7)	NM_203486	10683	NM_016941	ENSG00000090932	DLL3	delta like canonical Notch ligand 3	protein-coding
hypo1700	chr7:80360002-80370000	Intergenic	NM_001289908	948	NM_000072	ENSG00000135218	CD36	CD36 molecule	protein-coding
hypo1701	chr2:238520002-238530000	Intergenic	NM_001137550	9208	NM_004735	ENSG00000124831	LRRFIP1	LRR binding FLII interacting protein 1	protein-coding
hypo1702	chr16:81880002-81890000	intron (NM_002661, intron 2 of 32)	NM_002661	5336	NM_002661	ENSG00000197943	PLCG2	phospholipase C gamma 2	protein-coding
hypo1703	chr3:193080002-193090000	intron (NM_198505, intron 1 of 29)	NM_198505	344905	NM_198505	ENSG00000187527	ATP13A5	ATPase 13A5	protein-coding
hypo1704	chr10:42810002-42820000	Intergenic	NR_024380	441666	NR_024380	ENSG00000215146	LOC441666	zinc finger protein 91 pseudogene	pseudo
hypo1705	chr7:158520002-158530000	3' UTR (NM_020728, exon 22 of 22)	NM_001281933	54892	NM_017760	ENSG00000146918	NCAPG2	non-SMC condensin II complex subunit G2	protein-coding
hypo1706	chr6:129700002-129710000	intron (NM_000426, intron 35 of 64)	NM_033515	93663	NM_033515	ENSG00000146376	ARHGAP18	Rho GTPase activating protein 18	protein-coding
hypo1707	chr6:56490002-56500000	intron (NM_001144769, intron 30 of 96)	NM_015548	667	NM_001723	ENSG00000151914	DST	dystonin	protein-coding
hypo1708	chr14:85550002-85560000	Intergenic	NR_135155	105370605	NR_135155	ENSG00000258814	LOC105370605	uncharacterized LOC105370605	ncRNA
hypo1709	chr13:30520002-30530000	TTS (NR_033889)	NR_033889	440131	NM_001010918		LINC00544	long intergenic non-protein coding RNA 544	ncRNA
hypo171	chr17:78340002-78350000	intron (NM_001256071, intron 46 of 67)	NM_001164638	284131	NM_173627	ENSG00000173818	ENDOV	endonuclease V	protein-coding
hypo1710	chr14:56110002-56120000	intron (NM_004986, intron 20 of 41)	NM_001271014	3895	NM_004986	ENSG00000126777	KTN1	kinectin 1	protein-coding
hypo1711	chr14:57030002-57040000	Intergenic	NM_017799	54916	NM_017799	ENSG00000070269	TMEM260	transmembrane protein 260	protein-coding
hypo1712	chr21:41470002-41480000	intron (NM_001389, intron 20 of 32)	NR_039917	100616148	NR_039917	ENSG00000263973	MIR4760	microRNA 4760	ncRNA
hypo1713	chrX:47270002-47280000	Intergenic	NR_003710	100124540	NR_003710	ENSG00000221459	SNORA11C	small nucleolar RNA, H/ACA box 11C	snoRNA
hypo1714	chr13:87060002-87070000	Intergenic	NR_132371	106144533	NR_132371		LINC00430	long intergenic non-protein coding RNA 430	ncRNA
hypo1715	chr13:28020002-28030000	promoter-TSS (NM_001166262)	NM_001166263	219402	NM_152912	ENSG00000122033	MTIF3	mitochondrial translational initiation factor 3	protein-coding
hypo1716	chrX:14420002-14430000	Intergenic	NM_001118885	2742	NM_002063	ENSG00000101958	GLRA2	glycine receptor alpha 2	protein-coding
hypo1717	chr15:91700002-91710000	intron (NM_001323040, intron 2 of 12)	NM_001323040	9899	NM_014848	ENSG00000185518	SV2B	synaptic vesicle glycoprotein 2B	protein-coding
hypo1718	chr9:88290002-88300000	intron (NM_001330701, intron 4 of 25)	NM_001286717	23287	NM_015239	ENSG00000135049	AGTPBP1	ATP/GTP binding protein 1	protein-coding
hypo1719	chr3:44740002-44750000	Intergenic	NM_001134442	91392	NM_033210	ENSG00000196653	ZNF502	zinc finger protein 502	protein-coding
hypo172	chr10:94360002-94370000	intron (NM_004523, intron 1 of 21)	NM_004523	3832	NM_004523	ENSG00000138160	KIF11	kinesin family member 11	protein-coding
hypo1720	chr13:19770002-19780000	Intergenic	NR_126054	101928697	NR_126054		LOC101928697	uncharacterized LOC101928697	ncRNA
hypo1721	chr8:69240002-69250000	intron (NM_052958, intron 1 of 13)	NR_038877	286189	NR_038877	ENSG00000248801	C8orf34-AS1	C8orf34 antisense RNA 1	ncRNA
hypo1722	chr21:37070002-37080000	Intergenic	NR_030414	768219	NR_030414	ENSG00000211590	MIR802	microRNA 802	ncRNA
hypo1723	chr9:16960002-16970000	Intergenic	NM_017637	54796	NM_017637	ENSG00000173068	BNC2	basonuclin 2	protein-coding
hypo1724	chr2:136610002-136620000	intron (NM_005915, intron 10 of 16)	NM_005915	4175	NM_005915	ENSG00000076003	MCM6	minichromosome maintenance complex component 6	protein-coding
hypo1725	chr2:211550002-211560000	Intergenic	NR_002763	29034	NR_002763	ENSG00000280837	CPS1-IT1	CPS1 intronic transcript 1	ncRNA
hypo1726	chr12:61360002-61370000	Intergenic	NM_178539	338811	NM_178539	ENSG00000198673	FAM19A2	family with sequence similarity 19 member A2, C-C motif chemokine like	protein-coding
hypo1727	chrX:124890002-124900000	Intergenic	NR_110409	101928495	NR_110409	ENSG00000237208	LOC101928495	uncharacterized LOC101928495	ncRNA
hypo1728	chr9:39140002-39150000	intron (NM_033655, intron 10 of 23)	NM_033655	79937	NM_033655	ENSG00000106714	CNTNAP3	contactin associated protein-like 3	protein-coding
hypo1729	chr6:126020002-126030000	intron (NR_038906, intron 3 of 3)	NR_038906	643623	NR_038906	ENSG00000224506	LOC643623	uncharacterized LOC643623	ncRNA
hypo173	chr18:12950002-12960000	intron (NM_031216, intron 2 of 8)	NM_031216	81929	NM_031216	ENSG00000085415	SEH1L	SEH1 like nucleoporin	protein-coding
hypo1730	chrX:106150002-106160000	intron (NM_001171092, intron 1 of 1)	NM_001171095	9075	NM_020384	ENSG00000165376	CLDN2	claudin 2	protein-coding
hypo1731	chr10:98540002-98550000	Intergenic	NR_030338	693192	NR_030338	ENSG00000207976	MIR607	microRNA 607	ncRNA
hypo1732	chrX:32180002-32190000	intron (NM_004006, intron 44 of 78)	NM_004020	1756	NM_000109	ENSG00000198947	DMD	dystrophin	protein-coding
hypo1733	chr1:212780002-212790000	intron (NM_001206484, intron 2 of 4)	NM_001206488	467	NM_001674	ENSG00000162772	ATF3	activating transcription factor 3	protein-coding
hypo1734	chr18:73210002-73220000	Intergenic	NM_001037331	284274	NM_001037331	ENSG00000206026	SMIM21	small integral membrane protein 21	protein-coding
hypo1735	chr10:108160002-108170000	Intergenic	NR_134329	105378470	NR_134329	ENSG00000229775	LOC105378470	uncharacterized LOC105378470	ncRNA
hypo1736	chr1:144680002-144690000	intron (NM_001037501, intron 7 of 20)	NM_001277444	400818	NM_001037675	ENSG00000269713	NBPF9	neuroblastoma breakpoint family member 9	protein-coding
hypo1737	chr7:138370002-138380000	Intergenic	NM_001139456	136306	NM_174959	ENSG00000157703	SVOPL	SVOP like	protein-coding
hypo1738	chrX:143380002-143390000	Intergenic	NR_121210	389898	NM_001012989	ENSG00000276380	UBE2NL	ubiquitin conjugating enzyme E2 N like (gene/pseudogene)	protein-coding
hypo1739	chr4:164550002-164560000	intron (NM_001166373, intron 4 of 7)	NM_017923	55016	NM_017923	ENSG00000145416	2018-03-01	membrane associated ring-CH-type finger 1	protein-coding
hypo174	chr6:136680002-136690000	intron (NM_001198618, intron 10 of 17)	NM_001077440	9774	NM_014739	ENSG00000029363	BCLAF1	BCL2 associated transcription factor 1	protein-coding
hypo1740	chr12:5390002-5400000	Intergenic	NR_120476	101929584	NR_120476	ENSG00000256115	LOC101929584	uncharacterized LOC101929584	ncRNA
hypo1741	chr17:10850002-10860000	Intergenic	NM_001101387	644139	NM_001101387	ENSG00000233670	PIRT	phosphoinositide interacting regulator of transient receptor potential channels	protein-coding
hypo1742	chr5:89090002-89100000	Intergenic	NR_037433	100500825	NR_037433	ENSG00000264342	MIR3660	microRNA 3660	ncRNA
hypo1743	chr19:30610002-30620000	Intergenic	NM_003796	8725	NM_003796	ENSG00000105176	URI1	URI1, prefoldin like chaperone	protein-coding
hypo1744	chr10:13560002-13570000	Intergenic	NM_152751	222389	NM_152751	ENSG00000165626	BEND7	BEN domain containing 7	protein-coding
hypo1745	chr4:105700002-105710000	Intergenic	NM_025212	80319	NM_025212	ENSG00000168772	CXXC4	CXXC finger protein 4	protein-coding
hypo1746	chr14:54950002-54960000	intron (NM_004124, intron 1 of 6)	NM_004124	2764	NM_004124	ENSG00000197045	GMFB	glia maturation factor beta	protein-coding
hypo1747	chr7:136460002-136470000	Intergenic	NM_001006630	1129	NM_000739	ENSG00000181072	CHRM2	cholinergic receptor muscarinic 2	protein-coding
hypo1748	chrX:37340002-37350000	Intergenic	NM_198511	347404	NM_198511	ENSG00000147036	LANCL3	LanC like 3	protein-coding
hypo1749	chr10:6360002-6370000	Intergenic	NR_040079	399715	NR_040079	ENSG00000215244	LOC399715	uncharacterized LOC399715	ncRNA
hypo175	chr1:64060002-64070000	intron (NM_001172819, intron 1 of 10)	NM_001172819	5236	NM_002633	ENSG00000079739	PGM1	phosphoglucomutase 1	protein-coding
hypo1750	chr1:153810002-153820000	intron (NM_020699, intron 1 of 10)	NR_126565	343052	NR_126565	ENSG00000231827	LOC343052	immunoglobulin superfamily DCC subclass member 3 pseudogene	pseudo
hypo1751	chr5:11740002-11750000	intron (NR_109988, intron 1 of 21)	NM_001288716	1501	NM_001332	ENSG00000169862	CTNND2	catenin delta 2	protein-coding
hypo1752	chr7:38180002-38190000	Intergenic	NM_032016	83930	NM_032016	ENSG00000010270	STARD3NL	STARD3 N-terminal like	protein-coding
hypo1753	chr18:57700002-57710000	Intergenic	NM_021127	5366	NM_021127	ENSG00000141682	PMAIP1	phorbol-12-myristate-13-acetate-induced protein 1	protein-coding
hypo1754	chr7:11540002-11550000	intron (NM_015204, intron 6 of 26)	NM_015204	221981	NM_015204	ENSG00000005108	THSD7A	thrombospondin type 1 domain containing 7A	protein-coding
hypo1755	chr2:135480002-135490000	Intergenic	NM_030923	81615	NM_030923	ENSG00000152128	TMEM163	transmembrane protein 163	protein-coding
hypo1756	chr11:82110002-82120000	promoter-TSS (NR_120571)	NR_120571	101928989	NR_120571	ENSG00000245832	MIR4300HG	MIR4300 host gene	ncRNA
hypo1757	chr13:47060002-47070000	Intergenic	NR_120426	101929344	NR_120426		LINC01198	long intergenic non-protein coding RNA 1198	ncRNA
hypo1758	chr7:43740002-43750000	intron (NR_047701, intron 1 of 7)	NM_001321199	55744	NM_018224	ENSG00000106603	COA1	cytochrome c oxidase assembly factor 1 homolog	protein-coding
hypo1759	chr7:157960002-157970000	intron (NM_130843, intron 5 of 21)	NR_038966	100506585	NR_038966	ENSG00000233038	LOC100506585	uncharacterized LOC100506585	ncRNA
hypo176	chr1:161280002-161290000	intron (NM_001035513, intron 1 of 3)	NM_001035512	6391	NM_003001	ENSG00000143252	SDHC	succinate dehydrogenase complex subunit C	protein-coding
hypo1760	chr5:7120002-7130000	Intergenic	NR_039659	100616234	NR_039659	ENSG00000283468	MIR4454	microRNA 4454	ncRNA
hypo1761	chr10:84820002-84830000	Intergenic	NR_134317	105378397	NR_134317		LOC105378397	uncharacterized LOC105378397	ncRNA
hypo1762	chrX:122610002-122620000	intron (NM_007325, intron 14 of 15)	NM_001081550	57187	NM_020449	ENSG00000125676	THOC2	THO complex 2	protein-coding
hypo1763	chr9:74840002-74850000	intron (NM_004293, intron 9 of 13)	NR_110953	100507540	NR_110952	ENSG00000225434	LINC01504	long intergenic non-protein coding RNA 1504	ncRNA
hypo1764	chr5:155770002-155780000	intron (NM_001128209, intron 2 of 7)	NM_001128209	6444	NM_000337	ENSG00000170624	SGCD	sarcoglycan delta	protein-coding
hypo1765	chr1:101500002-101510000	intron (NR_109849, intron 1 of 4)	NR_109849	102606465	NR_109849		LOC102606465	uncharacterized LOC102606465	ncRNA
hypo1766	chr9:43470002-43480000	Intergenic	NR_126166	100996582	NR_126166		FAM74A7	family with sequence similarity 74 member A7	ncRNA
hypo1767	chr13:64520002-64530000	Intergenic	NR_130763	102723968	NR_130763	ENSG00000219926	LOC102723968	uncharacterized LOC102723968	ncRNA
hypo1768	chr7:98770002-98780000	intron (NM_001145715, intron 9 of 9)	NM_001145715	402569	NM_001145715	ENSG00000185467	KPNA7	karyopherin subunit alpha 7	protein-coding
hypo1769	chr12:1770002-1780000	Intergenic	NR_037422	100500816	NR_037422	ENSG00000266043	MIR3649	microRNA 3649	ncRNA
hypo177	chr1:211380002-211390000	Intergenic	NM_001136223	55758	NM_018254	ENSG00000117625	RCOR3	REST corepressor 3	protein-coding
hypo1770	chr2:32670002-32680000	intron (NM_016252, intron 22 of 73)	NR_030285	693143	NR_030285	ENSG00000207653	MIR558	microRNA 558	ncRNA
hypo1771	chr16:71570002-71580000	Intergenic	NM_001166395	10164	NM_005769	ENSG00000140835	CHST4	carbohydrate sulfotransferase 4	protein-coding
hypo1772	chr21:36120002-36130000	intron (NR_038885, intron 1 of 2)	NR_038886	100506385	NR_038885	ENSG00000234380	LINC01426	long intergenic non-protein coding RNA 1426	ncRNA
hypo1773	chr18:8330002-8340000	intron (NM_001105244, intron 22 of 32)	NR_024419	100192426	NR_024419	ENSG00000266149	LOC100192426	uncharacterized LOC100192426	ncRNA
hypo1774	chr5:28050002-28060000	Intergenic	NR_134265	105374698	NR_134265	ENSG00000249785	LINC02103	long intergenic non-protein coding RNA 2103	ncRNA
hypo1775	chr2:7260002-7270000	Intergenic	NR_110252	101929452	NR_110252	ENSG00000223884	LOC101929452	uncharacterized LOC101929452	ncRNA
hypo1776	chr22:19510002-19520000	Intergenic	NM_003277	7122	NM_003277	ENSG00000184113	CLDN5	claudin 5	protein-coding
hypo1777	chr17:20250002-20260000	intron (NR_023380, intron 8 of 15)	NR_023380	348254	NR_023380		CCDC144CP	coiled-coil domain containing 144C, pseudogene	pseudo
hypo1778	chr3:160050002-160060000	intron (NM_020800, intron 8 of 19)	NM_001190242	57560	NM_020800	ENSG00000068885	IFT80	intraflagellar transport 80	protein-coding
hypo1779	chr6:134900002-134910000	Intergenic	NR_125856	101928304	NR_125855		LOC101928304	uncharacterized LOC101928304	ncRNA
hypo178	chr17:50360002-50370000	Intergenic	NM_001082534	56934	NM_020178	ENSG00000154975	CA10	carbonic anhydrase 10	protein-coding
hypo1780	chr4:173200002-173210000	intron (NM_001034845, intron 3 of 12)	NR_125895	101928314	NR_125894		LOC101928314	uncharacterized LOC101928314	ncRNA
hypo1781	chr1:195560002-195570000	Intergenic	NR_039888	100616363	NR_039888	ENSG00000265986	MIR4735	microRNA 4735	ncRNA
hypo1782	chr17:8490002-8500000	intron (NM_005964, intron 3 of 40)	NM_001256095	4628	NM_005964	ENSG00000133026	MYH10	myosin heavy chain 10	protein-coding
hypo1783	chrX:18770002-18780000	intron (NM_006240, intron 7 of 18)	NR_046642	100874004	NR_046642		PPEF1-AS1	PPEF1 antisense RNA 1	ncRNA
hypo1784	chr1:215440002-215450000	Intergenic	NM_001017425	3776	NM_014217	ENSG00000082482	KCNK2	potassium two pore domain channel subfamily K member 2	protein-coding
hypo1785	chr12:10490002-10500000	Intergenic	NR_120430	101928100	NR_120430	ENSG00000245648	LOC101928100	uncharacterized LOC101928100	ncRNA
hypo1786	chr7:82990002-83000000	3' UTR (NM_012431, exon 17 of 17)	NM_033026	27445	NM_014510	ENSG00000186472	PCLO	piccolo presynaptic cytomatrix protein	protein-coding
hypo1787	chr1:240440002-240450000	intron (NM_001305424, intron 8 of 18)	NM_001305424	56776	NM_020066	ENSG00000155816	FMN2	formin 2	protein-coding
hypo1788	chr13:93420002-93430000	intron (NM_004466, intron 7 of 7)	NR_046520	100873969	NR_046520	ENSG00000235984	GPC5-AS1	GPC5 antisense RNA 1	ncRNA
hypo1789	chr2:208450002-208460000	intron (NM_001330133, intron 3 of 3)	NM_001330136	151194	NM_145280	ENSG00000144401	METTL21A	methyltransferase like 21A	protein-coding
hypo179	chr5:138700002-138710000	non-coding (NR_109830, exon 4 of 4)	NM_005847	9963	NM_005847	ENSG00000170482	SLC23A1	solute carrier family 23 member 1	protein-coding
hypo1790	chr2:227730002-227740000	intron (NM_032276, intron 3 of 6)	NM_001167608	84236	NM_032276	ENSG00000144468	RHBDD1	rhomboid domain containing 1	protein-coding
hypo1791	chr13:36580002-36590000	intron (NM_001330071, intron 3 of 16)	NM_004734	9201	NM_004734	ENSG00000133083	DCLK1	doublecortin like kinase 1	protein-coding
hypo1792	chrX:76520002-76530000	Intergenic	NM_003868	8823	NM_003868	ENSG00000196468	FGF16	fibroblast growth factor 16	protein-coding
hypo1793	chr10:4780002-4790000	Intergenic	NR_024475	100216001	NR_024475	ENSG00000231298	LINC00704	long intergenic non-protein coding RNA 704	ncRNA
hypo1794	chr11:134700002-134710000	Intergenic	NR_135050	100507548	NR_135050		LOC100507548	uncharacterized LOC100507548	ncRNA
hypo1795	chr10:75110002-75120000	intron (NM_145170, intron 1 of 27)	NM_145170	118491	NM_145170	ENSG00000156042	CFAP70	cilia and flagella associated protein 70	protein-coding
hypo1796	chr2:63940002-63950000	Intergenic	NM_001001521	7360	NM_006759	ENSG00000169764	UGP2	UDP-glucose pyrophosphorylase 2	protein-coding
hypo1797	chrX:133700002-133710000	intron (NM_001316889, intron 1 of 1)	NR_038998	100506757	NR_038998		LINC00629	long intergenic non-protein coding RNA 629	ncRNA
hypo1798	chr2:133720002-133730000	intron (NM_207481, intron 7 of 17)	NR_135572	101928185	NR_135572	ENSG00000233729	LOC101928185	uncharacterized LOC101928185	ncRNA
hypo1799	chr6:131930002-131940000	intron (NM_001270521, intron 10 of 29)	NM_001270522	9439	NM_004830	ENSG00000112282	MED23	mediator complex subunit 23	protein-coding
hypo18	chr19:34270002-34280000	Intergenic	NM_001129995	79047	NM_024076	ENSG00000153885	KCTD15	potassium channel tetramerization domain containing 15	protein-coding
hypo180	chr1:167040002-167050000	intron (NM_005814, intron 1 of 6)	NM_005814	10223	NM_005814	ENSG00000143167	GPA33	glycoprotein A33	protein-coding
hypo1800	chrX:96370002-96380000	intron (NM_007309, intron 21 of 26)	NM_013347	29935	NM_013347	ENSG00000204086	RPA4	replication protein A4	protein-coding
hypo1801	chrX:18790002-18800000	intron (NM_006240, intron 9 of 18)	NR_046642	100874004	NR_046642		PPEF1-AS1	PPEF1 antisense RNA 1	ncRNA
hypo1802	chr1:84550002-84560000	intron (NM_002731, intron 1 of 9)	NM_002731	5567	NM_002731	ENSG00000142875	PRKACB	protein kinase cAMP-activated catalytic subunit beta	protein-coding
hypo1803	chr13:34000002-34010000	intron (NM_001243476, intron 5 of 17)	NM_178006	90627	NM_052851	ENSG00000133121	STARD13	StAR related lipid transfer domain containing 13	protein-coding
hypo1804	chr7:120030002-120040000	intron (NM_012281, intron 1 of 5)	NM_012281	3751	NM_012281	ENSG00000184408	KCND2	potassium voltage-gated channel subfamily D member 2	protein-coding
hypo1805	chr20:9280002-9290000	intron (NM_001172646, intron 2 of 37)	NM_000933	5332	NM_000933	ENSG00000101333	PLCB4	phospholipase C beta 4	protein-coding
hypo1806	chr9:66330002-66340000	Intergenic	NR_121647	103352539	NR_121647	ENSG00000238113	LINC01410	long intergenic non-protein coding RNA 1410	ncRNA
hypo1807	chr1:106400002-106410000	Intergenic	NR_125955	101928476	NR_125954	ENSG00000230768	LINC01676	long intergenic non-protein coding RNA 1676	ncRNA
hypo1808	chr16:62250002-62260000	Intergenic	NM_001796	1006	NM_001796	ENSG00000150394	CDH8	cadherin 8	protein-coding
hypo1809	chr15:95300002-95310000	Intergenic	NR_077061	440311	NR_077061	ENSG00000260521	LOC440311	glioma tumor suppressor candidate region gene 2 pseudogene	pseudo
hypo181	chr12:30990002-31000000	Intergenic	NR_040245	100287314	NR_040245	ENSG00000235884	LINC00941	long intergenic non-protein coding RNA 941	ncRNA
hypo1810	chrX:102630002-102640000	Intergenic	NM_014380	27018	NM_014380	ENSG00000166681	BEX3	brain expressed X-linked 3	protein-coding
hypo1811	chr21:39420002-39430000	Intergenic	NM_005867	10281	NM_005867	ENSG00000184029	DSCR4	Down syndrome critical region 4	protein-coding
hypo1812	chr3:124280002-124290000	intron (NM_001024660, intron 34 of 59)	NM_001322994	8997	NM_003947	ENSG00000160145	KALRN	kalirin, RhoGEF kinase	protein-coding
hypo1813	chr3:81190002-81200000	Intergenic	NR_132411	728290	NR_132411	ENSG00000243694	LINC02027	long intergenic non-protein coding RNA 2027	ncRNA
hypo1814	chr8:88090002-88100000	intron (NM_173538, intron 4 of 10)	NM_173538	168975	NM_173538	ENSG00000176571	CNBD1	cyclic nucleotide binding domain containing 1	protein-coding
hypo1815	chr3:66770002-66780000	Intergenic	NR_135533	105377143	NR_135533		LOC105377143	uncharacterized LOC105377143	ncRNA
hypo1816	chr12:4330002-4340000	Intergenic	NM_001759	894	NM_001759	ENSG00000118971	CCND2	cyclin D2	protein-coding
hypo1817	chrX:20070002-20080000	intron (NM_152780, intron 3 of 15)	NR_037414	100500809	NR_037414	ENSG00000264566	MIR23C	microRNA 23c	ncRNA
hypo1818	chr17:47200002-47210000	Intergenic	NM_001159388	124872	NM_153446	ENSG00000167080	B4GALNT2	beta-1,4-N-acetyl-galactosaminyltransferase 2	protein-coding
hypo1819	chr4:147630002-147640000	intron (NR_133922, intron 12 of 13)	NM_004575	5458	NM_004575	ENSG00000151615	POU4F2	POU class 4 homeobox 2	protein-coding
hypo182	chr15:20140002-20150000	Intergenic	NR_038836	646096	NR_038836	ENSG00000259156	CHEK2P2	checkpoint kinase 2 pseudogene 2	pseudo
hypo1820	chr11:102410002-102420000	Intergenic	NM_002423	4316	NM_002423	ENSG00000137673	MMP7	matrix metallopeptidase 7	protein-coding
hypo1821	chr2:126510002-126520000	Intergenic	NM_016815	2995	NM_002101	ENSG00000136732	GYPC	glycophorin C (Gerbich blood group)	protein-coding
hypo1822	chr19:39950002-39960000	intron (NM_003169, intron 9 of 28)	NM_001001563	92609	NM_001001563	ENSG00000105197	TIMM50	translocase of inner mitochondrial membrane 50	protein-coding
hypo1823	chr15:56730002-56740000	intron (NM_018365, intron 7 of 9)	NM_018365	55329	NM_018365	ENSG00000138587	MNS1	meiosis specific nuclear structural 1	protein-coding
hypo1824	chr2:224090002-224100000	Intergenic	NM_080671	23704	NM_080671	ENSG00000152049	KCNE4	potassium voltage-gated channel subfamily E regulatory subunit 4	protein-coding
hypo1825	chr11:29140002-29150000	Intergenic	NR_107035	102466876	NR_107035	ENSG00000273912	MIR8068	microRNA 8068	ncRNA
hypo1826	chr1:98710002-98720000	intron (NR_046088, intron 1 of 2)	NR_046088	729987	NR_046088	ENSG00000226053	LINC01776	long intergenic non-protein coding RNA 1776	ncRNA
hypo1827	chr1:169420002-169430000	intron (NM_001300968, intron 2 of 6)	NM_001300968	57821	NM_021179	ENSG00000117477	CCDC181	coiled-coil domain containing 181	protein-coding
hypo1828	chr16:81240002-81250000	intron (NM_001076780, intron 3 of 17)	NM_001076780	114780	NM_052892	ENSG00000166473	PKD1L2	polycystin 1 like 2 (gene/pseudogene)	protein-coding
hypo1829	chr13:70990002-71000000	Intergenic	NM_001286725	57626	NM_020866	ENSG00000150361	KLHL1	kelch like family member 1	protein-coding
hypo183	chr22:25250002-25260000	intron (NM_133454, intron 8 of 24)	NM_001039948	129049	NM_133454	ENSG00000167037	SGSM1	small G protein signaling modulator 1	protein-coding
hypo1830	chr12:129820002-129830000	intron (NM_133448, intron 3 of 8)	NR_110058	101927735	NR_110058	ENSG00000256699	LOC101927735	uncharacterized LOC101927735	ncRNA
hypo1831	chr11:81690002-81700000	intron (NR_120571, intron 6 of 7)	NR_036186	100422823	NR_036186	ENSG00000264110	MIR4300	microRNA 4300	ncRNA
hypo1832	chr2:51940002-51950000	intron (NR_135237, intron 5 of 10)	NR_135239	105374596	NR_135239	ENSG00000225444	LINC01867	long intergenic non-protein coding RNA 1867	ncRNA
hypo1833	chr19:52170002-52180000	Intergenic	NM_001316994	147650	NM_207324	ENSG00000182310	SPACA6	sperm acrosome associated 6	protein-coding
hypo1834	chrX:117610002-117620000	Intergenic	NM_144658	139818	NM_144658	ENSG00000147251	DOCK11	dedicator of cytokinesis 11	protein-coding
hypo1835	chr6:120530002-120540000	Intergenic	NR_036098	100422951	NR_036098	ENSG00000265725	MIR3144	microRNA 3144	ncRNA
hypo1836	chr12:58540002-58550000	Intergenic	NR_135022	105369785	NR_135022	ENSG00000257541	LOC105369785	uncharacterized LOC105369785	ncRNA
hypo1837	chr19:9650002-9660000	Intergenic	NR_134920	101928238	NR_134920	ENSG00000278611	LOC101928238	uncharacterized LOC101928238	ncRNA
hypo1838	chr12:47830002-47840000	Intergenic	NR_039715	100616478	NR_039715	ENSG00000264906	MIR4494	microRNA 4494	ncRNA
hypo1839	chr1:2880002-2890000	Intergenic	NM_080431	140625	NM_080431	ENSG00000169717	ACTRT2	actin related protein T2	protein-coding
hypo184	chr13:113590002-113600000	Intergenic	NR_034002	100289410	NR_034002		MCF2L-AS1	MCF2L antisense RNA 1	ncRNA
hypo1840	chr2:135350002-135360000	intron (NM_030923, intron 2 of 7)	NM_030923	81615	NM_030923	ENSG00000152128	TMEM163	transmembrane protein 163	protein-coding
hypo1841	chrX:131760002-131770000	intron (NM_147175, intron 3 of 3)	NR_046691	100874102	NR_046691	ENSG00000235849	HS6ST2-AS1	HS6ST2 antisense RNA 1	ncRNA
hypo1842	chr6:152680002-152690000	intron (NM_182961, intron 63 of 145)	NR_120501	100505475	NR_120501		SYNE1-AS1	SYNE1 antisense RNA 1	ncRNA
hypo1843	chr8:55450002-55460000	Intergenic	NM_006269	6101	NM_006269	ENSG00000104237	RP1	RP1, axonemal microtubule associated	protein-coding
hypo1844	chr16:53590002-53600000	Intergenic	NM_001308325	64400	NM_022476	ENSG00000166971	AKTIP	AKT interacting protein	protein-coding
hypo1845	chr5:38880002-38890000	intron (NM_001323504, intron 5 of 6)	NM_001323504	9180	NM_003999	ENSG00000145623	OSMR	oncostatin M receptor	protein-coding
hypo1846	chr1:217650002-217660000	intron (NM_018040, intron 8 of 9)	NM_018040	55105	NM_018040	ENSG00000092978	GPATCH2	G-patch domain containing 2	protein-coding
hypo1847	chr14:84520002-84530000	Intergenic	NR_135155	105370605	NR_135155	ENSG00000258814	LOC105370605	uncharacterized LOC105370605	ncRNA
hypo1848	chr1:190000002-190010000	Intergenic	NM_001317188	339479	NM_199051	ENSG00000162670	BRINP3	BMP/retinoic acid inducible neural specific 3	protein-coding
hypo1849	chr5:810002-820000	intron (NM_024786, intron 10 of 12)	NM_024786	79844	NM_024786	ENSG00000188818	ZDHHC11	zinc finger DHHC-type containing 11	protein-coding
hypo185	chr8:53180002-53190000	intron (NM_014682, intron 2 of 25)	NR_134310	101929341	NR_134310	ENSG00000253551	LOC101929341	uncharacterized LOC101929341	ncRNA
hypo1850	chr20:13100002-13110000	intron (NM_018327, intron 8 of 11)	NM_080826	140862	NM_080826	ENSG00000101230	ISM1	isthmin 1	protein-coding
hypo1851	chr8:38700002-38710000	intron (NM_001330521, intron 12 of 12)	NM_021623	59339	NM_021623	ENSG00000169499	PLEKHA2	pleckstrin homology domain containing A2	protein-coding
hypo1852	chr10:42780002-42790000	Intergenic	NR_024380	441666	NR_024380	ENSG00000215146	LOC441666	zinc finger protein 91 pseudogene	pseudo
hypo1853	chr5:161260002-161270000	Intergenic	NM_000806	2554	NM_000806	ENSG00000022355	GABRA1	gamma-aminobutyric acid type A receptor alpha1 subunit	protein-coding
hypo1854	chr17:7030002-7040000	Intergenic	NM_080912	433	NM_001181	ENSG00000161944	ASGR2	asialoglycoprotein receptor 2	protein-coding
hypo1855	chr3:172710002-172720000	intron (NM_031955, intron 4 of 10)	NM_031955	83893	NM_031955	ENSG00000144962	SPATA16	spermatogenesis associated 16	protein-coding
hypo1856	chr12:99540002-99550000	intron (NM_152788, intron 15 of 25)	NM_181670	56899	NM_020140	ENSG00000185046	ANKS1B	ankyrin repeat and sterile alpha motif domain containing 1B	protein-coding
hypo1857	chr11:19160002-19170000	intron (NM_019028, intron 2 of 16)	NM_001001483	54503	NM_019028	ENSG00000177054	ZDHHC13	zinc finger DHHC-type containing 13	protein-coding
hypo1858	chr21:35460002-35470000	intron (NM_032476, intron 1 of 2)	NM_032476	64968	NM_032476	ENSG00000243927	MRPS6	mitochondrial ribosomal protein S6	protein-coding
hypo1859	chr12:102020002-102030000	intron (NM_001254723, intron 3 of 26)	NM_001254722	4604	NM_002465	ENSG00000196091	MYBPC1	myosin binding protein C, slow type	protein-coding
hypo186	chr1:202000002-202010000	Intergenic	NM_001114309	1999	NM_004433	ENSG00000163435	ELF3	E74 like ETS transcription factor 3	protein-coding
hypo1860	chr1:172060002-172070000	intron (NM_015569, intron 13 of 20)	NR_036066	100422882	NR_036066	ENSG00000283152	MIR3120	microRNA 3120	ncRNA
hypo1861	chr1:81440002-81450000	Intergenic	NR_125942	101927412	NR_125940	ENSG00000234184	LINC01781	long intergenic non-protein coding RNA 1781	ncRNA
hypo1862	chr16:61810002-61820000	intron (NM_001796, intron 8 of 11)	NM_001796	1006	NM_001796	ENSG00000150394	CDH8	cadherin 8	protein-coding
hypo1863	chr11:87780002-87790000	Intergenic	NM_022337	23682	NM_022337	ENSG00000123892	RAB38	RAB38, member RAS oncogene family	protein-coding
hypo1864	chr8:115860002-115870000	Intergenic	NM_001282902	7227	NM_014112	ENSG00000104447	TRPS1	transcriptional repressor GATA binding 1	protein-coding
hypo1865	chr1:151920002-151930000	Intergenic	NM_002966	6281	NM_002966	ENSG00000197747	S100A10	S100 calcium binding protein A10	protein-coding
hypo1866	chr13:32360002-32370000	intron (NM_001166058, intron 13 of 16)	NM_130806	122042	NM_130806	ENSG00000133105	RXFP2	relaxin/insulin like family peptide receptor 2	protein-coding
hypo1867	chr3:140630002-140640000	Intergenic	NM_018155	55186	NM_018155	ENSG00000114120	SLC25A36	solute carrier family 25 member 36	protein-coding
hypo1868	chr10:42660002-42670000	Intergenic	NR_024380	441666	NR_024380	ENSG00000215146	LOC441666	zinc finger protein 91 pseudogene	pseudo
hypo1869	chr12:76940002-76950000	intron (NM_001319652, intron 1 of 25)	NM_020841	114882	NM_020841	ENSG00000091039	OSBPL8	oxysterol binding protein like 8	protein-coding
hypo187	chr13:40850002-40860000	Intergenic	NR_033877	400123	NR_033877	ENSG00000215483	LINC00548	long intergenic non-protein coding RNA 548	ncRNA
hypo1870	chr5:96500002-96510000	intron (NM_001159749, intron 6 of 7)	NM_001159749	55781	NM_018343	ENSG00000058729	RIOK2	RIO kinase 2	protein-coding
hypo1871	chr12:16840002-16850000	Intergenic	NR_045012	55885	NM_018640	ENSG00000048540	LMO3	LIM domain only 3	protein-coding
hypo1872	chr11:110600002-110610000	Intergenic	NM_001258418	57569	NM_020809	ENSG00000137727	ARHGAP20	Rho GTPase activating protein 20	protein-coding
hypo1873	chr10:17720002-17730000	intron (NM_001324285, intron 3 of 14)	NM_001324285	8027	NM_003473	ENSG00000136738	STAM	signal transducing adaptor molecule	protein-coding
hypo1874	chr3:159010002-159020000	intron (NM_001197108, intron 1 of 6)	NR_037483	100500803	NR_037483	ENSG00000263634	MIR3919	microRNA 3919	ncRNA
hypo1875	chr12:46790002-46800000	intron (NR_125381, intron 2 of 2)	NR_125381	100288798	NR_125377		LOC100288798	uncharacterized LOC100288798	ncRNA
hypo1876	chr6:25870002-25880000	promoter-TSS (NM_006632)	NM_006632	10786	NM_006632	ENSG00000124564	SLC17A3	solute carrier family 17 member 3	protein-coding
hypo1877	chr2:69590002-69600000	intron (NM_002056, intron 3 of 18)	NM_001244710	2673	NM_002056	ENSG00000198380	GFPT1	glutamine--fructose-6-phosphate transaminase 1	protein-coding
hypo1878	chr20:37520002-37530000	intron (NM_001172735, intron 4 of 9)	NM_030919	81610	NM_030919	ENSG00000101447	FAM83D	family with sequence similarity 83 member D	protein-coding
hypo1879	chr15:53130002-53140000	Intergenic	NM_004498	3175	NM_004498	ENSG00000169856	ONECUT1	one cut homeobox 1	protein-coding
hypo188	chr16:67030002-67040000	intron (NM_001318506, intron 2 of 11)	NM_001190202	283848	NM_173815	ENSG00000172824	CES4A	carboxylesterase 4A	protein-coding
hypo1880	chrX:107480002-107490000	intron (NM_001847, intron 3 of 44)	NM_001321290	115201	NM_052936	ENSG00000101844	ATG4A	autophagy related 4A cysteine peptidase	protein-coding
hypo1881	chr12:21730002-21740000	intron (NM_021957, intron 1 of 15)	NM_021957	2998	NM_021957	ENSG00000111713	GYS2	glycogen synthase 2	protein-coding
hypo1882	chr1:174990002-175000000	Intergenic	NR_037606	63931	NM_022100	ENSG00000120333	MRPS14	mitochondrial ribosomal protein S14	protein-coding
hypo1883	chr16:32830002-32840000	Intergenic	NR_003083	386757	NM_198857	ENSG00000214617	SLC6A10P	solute carrier family 6 member 10, pseudogene	pseudo
hypo1884	chr1:161020002-161030000	intron (NM_001287600, intron 2 of 10)	NM_207005	7391	NM_007122	ENSG00000158773	USF1	upstream transcription factor 1	protein-coding
hypo1885	chrX:38440002-38450000	intron (NM_004615, intron 1 of 7)	NM_004615	7102	NM_004615	ENSG00000156298	TSPAN7	tetraspanin 7	protein-coding
hypo1886	chr4:144970002-144980000	Intergenic	NM_002100	2994	NM_002100	ENSG00000250361	GYPB	glycophorin B (MNS blood group)	protein-coding
hypo1887	chr4:107990002-108000000	Intergenic	NM_014421	27123	NM_014421	ENSG00000155011	DKK2	dickkopf WNT signaling pathway inhibitor 2	protein-coding
hypo1888	chr2:64010002-64020000	Intergenic	NM_001001521	7360	NM_006759	ENSG00000169764	UGP2	UDP-glucose pyrophosphorylase 2	protein-coding
hypo1889	chr8:77390002-77400000	intron (NR_105006, intron 3 of 5)	NR_105006	101926978	NR_105006	ENSG00000254300	LINC01111	long intergenic non-protein coding RNA 1111	ncRNA
hypo189	chr16:86310002-86320000	intron (NR_104139, intron 1 of 5)	NR_104139	101154687	NR_104139		LINC01081	long intergenic non-protein coding RNA 1081	ncRNA
hypo1890	chr7:7800002-7810000	intron (NM_001302350, intron 3 of 4)	NM_002947	6119	NM_002947	ENSG00000106399	RPA3	replication protein A3	protein-coding
hypo1891	chr19:30480002-30490000	intron (NM_003796, intron 4 of 10)	NM_003796	8725	NM_003796	ENSG00000105176	URI1	URI1, prefoldin like chaperone	protein-coding
hypo1892	chrX:4390002-4400000	Intergenic	NR_110390	101928201	NR_110390	ENSG00000236513	LOC101928201	uncharacterized LOC101928201	ncRNA
hypo1893	chr4:190380002-190390000	Intergenic	NR_121679	101928971	NR_121679	ENSG00000250739	LINC01262	long intergenic non-protein coding RNA 1262	ncRNA
hypo1894	chr11:32880002-32890000	Intergenic	NM_001076786	79832	NM_024774	ENSG00000060749	QSER1	glutamine and serine rich 1	protein-coding
hypo1895	chr4:67090002-67100000	Intergenic	NR_031673	100302177	NR_031673	ENSG00000221563	MIR1269A	microRNA 1269a	ncRNA
hypo1896	chr5:22420002-22430000	intron (NM_004061, intron 2 of 14)	NM_001317228	1010	NM_004061	ENSG00000154162	CDH12	cadherin 12	protein-coding
hypo1897	chr2:37190002-37200000	Intergenic	NM_003162	6801	NM_003162	ENSG00000115808	STRN	striatin	protein-coding
hypo1898	chrX:30750002-30760000	Intergenic	NM_203391	2710	NM_000167	ENSG00000198814	GK	glycerol kinase	protein-coding
hypo1899	chr16:53900002-53910000	intron (NM_001080432, intron 4 of 8)	NM_001080432	79068	NM_001080432	ENSG00000140718	FTO	FTO, alpha-ketoglutarate dependent dioxygenase	protein-coding
hypo19	chr17:8350002-8360000	intron (NM_001025579, intron 6 of 9)	NM_001025579	81565	NM_030808	ENSG00000166579	NDEL1	nudE neurodevelopment protein 1 like 1	protein-coding
hypo190	chr18:59210002-59220000	intron (NM_031891, intron 10 of 11)	NR_103449	100996669	NR_103449		LINC01544	long intergenic non-protein coding RNA 1544	ncRNA
hypo1900	chr13:39260002-39270000	exon (NM_207361, exon 1 of 24)	NM_207361	341640	NM_207361	ENSG00000150893	FREM2	FRAS1 related extracellular matrix protein 2	protein-coding
hypo1901	chr5:103760002-103770000	Intergenic	NR_000039	9366	NR_000039	ENSG00000232159	RAB9BP1	RAB9B, member RAS oncogene family pseudogene 1	pseudo
hypo1902	chr5:180380002-180390000	Intergenic	NM_197975	10917	NM_006707	ENSG00000168903	BTNL3	butyrophilin like 3	protein-coding
hypo1903	chr13:43440002-43450000	intron (NR_126389, intron 1 of 4)	NR_126388	104355147	NR_126388		LINC00428	long intergenic non-protein coding RNA 428	ncRNA
hypo1904	chr22:50420002-50430000	Intergenic	NM_001001694	400935	NM_001001694	ENSG00000188263	IL17REL	interleukin 17 receptor E like	protein-coding
hypo1905	chr13:64540002-64550000	Intergenic	NR_130763	102723968	NR_130763	ENSG00000219926	LOC102723968	uncharacterized LOC102723968	ncRNA
hypo1906	chr11:7260002-7270000	Intergenic	NM_175733	143425	NM_175733	ENSG00000170743	SYT9	synaptotagmin 9	protein-coding
hypo1907	chr16:28180002-28190000	intron (NM_001270940, intron 5 of 24)	NM_001270940	23214	NM_015171	ENSG00000169180	XPO6	exportin 6	protein-coding
hypo1908	chrX:102340002-102350000	intron (NM_022052, intron 1 of 19)	NM_022052	56000	NM_022052	ENSG00000147206	NXF3	nuclear RNA export factor 3	protein-coding
hypo1909	chr15:51480002-51490000	Intergenic	NR_039863	100616369	NR_039863	ENSG00000266593	MIR4713	microRNA 4713	ncRNA
hypo191	chr8:144500002-144510000	Intergenic	NR_126358	104326051	NR_126358	ENSG00000254338	MAFA-AS1	MAFA antisense RNA 1	ncRNA
hypo1910	chrX:20820002-20830000	Intergenic	NM_004586	6197	NM_004586	ENSG00000177189	RPS6KA3	ribosomal protein S6 kinase A3	protein-coding
hypo1911	chr11:75110002-75120000	promoter-TSS (NR_000025)	NR_000025	114599	NR_000025	ENSG00000207445	SNORD15B	small nucleolar RNA, C/D box 15B	snoRNA
hypo1912	chr8:96350002-96360000	intron (NR_038208, intron 2 of 3)	NM_177965	157657	NM_177965	ENSG00000156172	C8orf37	chromosome 8 open reading frame 37	protein-coding
hypo1913	chr13:77720002-77730000	exon (NM_015057, exon 47 of 83)	NR_046716	100874212	NR_046716	ENSG00000236051	MYCBP2-AS1	MYCBP2 antisense RNA 1	ncRNA
hypo1914	chr6:57370002-57380000	intron (NM_000947, intron 8 of 14)	NR_036097	100422884	NR_036097	ENSG00000212017	MIR548U	microRNA 548u	ncRNA
hypo1915	chr10:35030002-35040000	intron (NM_001184785, intron 1 of 24)	NM_001184785	56288	NM_019619	ENSG00000148498	PARD3	par-3 family cell polarity regulator	protein-coding
hypo1916	chr18:40320002-40330000	intron (NM_002930, intron 4 of 4)	NM_002930	6014	NM_002930	ENSG00000152214	RIT2	Ras like without CAAX 2	protein-coding
hypo1917	chr13:56680002-56690000	Intergenic	NR_049804	100846996	NR_049804	ENSG00000264387	MIR5007	microRNA 5007	ncRNA
hypo1918	chr4:43980002-43990000	Intergenic	NR_131959	100506827	NR_131958	ENSG00000251350	LVCAT1	liver cancer-associated transcript 1	ncRNA
hypo1919	chrX:103080002-103090000	intron (NM_016370, intron 1 of 2)	NM_016370	51209	NM_016370	ENSG00000123570	RAB9B	RAB9B, member RAS oncogene family	protein-coding
hypo192	chr21:37400002-37410000	Intergenic	NR_110419	100996609	NR_110419		LINC01436	long intergenic non-protein coding RNA 1436	ncRNA
hypo1920	chr4:99770002-99780000	Intergenic	NM_001130678	1977	NM_001968	ENSG00000151247	EIF4E	eukaryotic translation initiation factor 4E	protein-coding
hypo1921	chr11:43010002-43020000	Intergenic	NR_033868	399881	NR_033868	ENSG00000251557	HNRNPKP3	heterogeneous nuclear ribonucleoprotein K pseudogene 3	pseudo
hypo1922	chr5:151220002-151230000	intron (NM_001292000, intron 6 of 7)	NR_132345	100652758	NM_001278082		LOC100652758	uncharacterized LOC100652758	ncRNA
hypo1923	chr3:29410002-29420000	intron (NM_001003792, intron 1 of 13)	NM_014483	27303	NM_014483	ENSG00000144642	RBMS3	RNA binding motif single stranded interacting protein 3	protein-coding
hypo1924	chr5:142610002-142620000	Intergenic	NR_046816	100874372	NR_046816	ENSG00000230789	ARHGAP26-IT1	ARHGAP26 intronic transcript 1	ncRNA
hypo1925	chr10:45450002-45460000	promoter-TSS (NM_032023)	NR_033842	220980	NR_033842	ENSG00000224812	TMEM72-AS1	TMEM72 antisense RNA 1	ncRNA
hypo1926	chr17:18410002-18420000	non-coding (NR_003554, exon 5 of 5)	NR_003554	220594	NM_145809	ENSG00000233327	USP32P2	ubiquitin specific peptidase 32 pseudogene 2	pseudo
hypo1927	chr13:95900002-95910000	intron (NM_001105515, intron 1 of 20)	NM_001301829	10257	NM_005845	ENSG00000125257	ABCC4	ATP binding cassette subfamily C member 4	protein-coding
hypo1928	chrX:145170002-145180000	Intergenic	NR_030581	100126341	NR_030581	ENSG00000216056	MIR891A	microRNA 891a	ncRNA
hypo1929	chrX:37830002-37840000	Intergenic	NM_012274	25763	NM_012274	ENSG00000187516	HYPM	huntingtin interacting protein M	protein-coding
hypo193	chr8:73030002-73040000	Intergenic	NM_007332	8989	NM_007332	ENSG00000104321	TRPA1	transient receptor potential cation channel subfamily A member 1	protein-coding
hypo1930	chr9:42340002-42350000	Intergenic	NM_001012421	441430	NM_001012421	ENSG00000183148	ANKRD20A2	ankyrin repeat domain 20 family member A2	protein-coding
hypo1931	chr5:165800002-165810000	Intergenic	NR_108020	102557615	NR_108020	ENSG00000254130	LINC01947	long intergenic non-protein coding RNA 1947	ncRNA
hypo1932	chr4:14830002-14840000	intron (NR_126435, intron 2 of 6)	NR_126435	201853	NR_126435	ENSG00000248360	LINC00504	long intergenic non-protein coding RNA 504	ncRNA
hypo1933	chr6:18770002-18780000	Intergenic	NR_030312	693125	NR_030312	ENSG00000207775	MIR548A1	microRNA 548a-1	ncRNA
hypo1934	chr12:69650002-69660000	intron (NM_007007, intron 8 of 9)	NR_031692	100302182	NR_031692	ENSG00000283476	MIR1279	microRNA 1279	ncRNA
hypo1935	chr7:68180002-68190000	Intergenic	NR_120514	102723427	NR_120514	ENSG00000225209	LOC102723427	uncharacterized LOC102723427	ncRNA
hypo1936	chr8:91580002-91590000	Intergenic	NR_104062	101937451	NR_104062	ENSG00000253799	LINC01030	long intergenic non-protein coding RNA 1030	ncRNA
hypo1937	chr15:87180002-87190000	intron (NM_152336, intron 22 of 24)	NR_135682	105370954	NR_135682	ENSG00000259636	LOC105370954	uncharacterized LOC105370954	ncRNA
hypo1938	chr2:184840002-184850000	Intergenic	NR_039638	100616305	NR_039638	ENSG00000266808	MIR548AE1	microRNA 548ae-1	ncRNA
hypo1939	chr20:54970002-54980000	intron (NM_001033521, intron 5 of 5)	NM_001033522	1477	NM_001324	ENSG00000101138	CSTF1	cleavage stimulation factor subunit 1	protein-coding
hypo194	chr5:84120002-84130000	Intergenic	NM_001278642	10085	NM_005711	ENSG00000164176	EDIL3	EGF like repeats and discoidin domains 3	protein-coding
hypo1940	chr14:68550002-68560000	intron (NM_001321809, intron 7 of 11)	NM_001321815	5890	NM_002877	ENSG00000182185	RAD51B	RAD51 paralog B	protein-coding
hypo1941	chr4:32000002-32010000	intron (NR_125936, intron 1 of 2)	NR_125936	102723828	NR_125936	ENSG00000251129	LOC102723828	uncharacterized LOC102723828	ncRNA
hypo1942	chr2:5140002-5150000	Intergenic	NR_034134	727982	NR_034134	ENSG00000231532	LINC01249	long intergenic non-protein coding RNA 1249	ncRNA
hypo1943	chr5:19770002-19780000	intron (NM_001291956, intron 5 of 14)	NM_001291957	1016	NM_004934	ENSG00000145526	CDH18	cadherin 18	protein-coding
hypo1944	chr7:147140002-147150000	intron (NM_014141, intron 10 of 23)	NR_031645	100313895	NR_031645	ENSG00000221442	MIR548F4	microRNA 548f-4	ncRNA
hypo1945	chr3:33240002-33250000	intron (NM_015551, intron 3 of 4)	NM_015551	26032	NM_015551	ENSG00000173705	SUSD5	sushi domain containing 5	protein-coding
hypo1946	chr1:92540002-92550000	promoter-TSS (NM_183242)	NM_183242	284697	NM_183242	ENSG00000189195	BTBD8	BTB domain containing 8	protein-coding
hypo1947	chr3:182550002-182560000	intron (NM_014616, intron 7 of 29)	NM_014616	23200	NM_014616	ENSG00000058063	ATP11B	ATPase phospholipid transporting 11B (putative)	protein-coding
hypo1948	chr7:13270002-13280000	Intergenic	NM_005738	10124	NM_005738	ENSG00000122644	ARL4A	ADP ribosylation factor like GTPase 4A	protein-coding
hypo1949	chr8:129280002-129290000	Intergenic	NR_031613	100302281	NR_031613	ENSG00000221261	MIR1208	microRNA 1208	ncRNA
hypo195	chr5:34720002-34730000	intron (NM_001145525, intron 4 of 19)	NM_001145523	26064	NM_015577	ENSG00000039560	RAI14	retinoic acid induced 14	protein-coding
hypo1950	chr3:17160002-17170000	Intergenic	NR_037465	100500913	NR_037465	ENSG00000154822	MIR3714	microRNA 3714	ncRNA
hypo1951	chrX:74960002-74970000	Intergenic	NR_030737	286495	NR_030737		TTC3P1	tetratricopeptide repeat domain 3 pseudogene 1	pseudo
hypo1952	chr3:141220002-141230000	intron (NM_001303245, intron 1 of 23)	NM_001303246	5922	NM_006506	ENSG00000155903	RASA2	RAS p21 protein activator 2	protein-coding
hypo1953	chr9:11840002-11850000	Intergenic	NM_000550	7306	NM_000550	ENSG00000107165	TYRP1	tyrosinase related protein 1	protein-coding
hypo1954	chr3:128870002-128880000	intron (NM_020701, intron 5 of 10)	NM_001199469	57461	NM_020701	ENSG00000240682	ISY1	ISY1 splicing factor homolog	protein-coding
hypo1955	chr2:122340002-122350000	intron (NM_001142274, intron 2 of 37)	NR_023343	100151683	NR_023343	ENSG00000264229	RNU4ATAC	RNA, U4atac small nuclear (U12-dependent splicing)	snRNA
hypo1956	chr15:85980002-85990000	intron (NM_007200, intron 1 of 36)	NM_007200	11214	NM_006738	ENSG00000170776	AKAP13	A-kinase anchoring protein 13	protein-coding
hypo1957	chrX:109690002-109700000	exon (NM_020769, exon 3 of 4)	NM_001171689	9949	NM_015365	ENSG00000101935	AMMECR1	Alport syndrome, mental retardation, midface hypoplasia and elliptocytosis chromosomal region gene 1	protein-coding
hypo1958	chr13:86600002-86610000	Intergenic	NM_032229	84189	NM_032229	ENSG00000184564	SLITRK6	SLIT and NTRK like family member 6	protein-coding
hypo1959	chrX:56550002-56560000	Intergenic	NM_013444	29978	NM_013444	ENSG00000188021	UBQLN2	ubiquilin 2	protein-coding
hypo196	chr3:166530002-166540000	Intergenic	NR_135545	105374194	NR_135545		LOC105374194	uncharacterized LOC105374194	ncRNA
hypo1960	chr1:187160002-187170000	intron (NR_126347, intron 1 of 3)	NR_126347	104169671	NR_126347		LINC01036	long intergenic non-protein coding RNA 1036	ncRNA
hypo1961	chr7:20630002-20640000	Intergenic	NM_001163941	340273	NM_178559	ENSG00000004846	ABCB5	ATP binding cassette subfamily B member 5	protein-coding
hypo1962	chr1:157090002-157100000	exon (NM_001145312, exon 5 of 5)	NR_001560	360155	NR_001560	ENSG00000235700	CYCSP52	cytochrome c, somatic pseudogene 52	pseudo
hypo1963	chr8:15210002-15220000	Intergenic	NM_001322880	137868	NM_139167	ENSG00000185053	SGCZ	sarcoglycan zeta	protein-coding
hypo1964	chr8:78050002-78060000	Intergenic	NM_001172087	5828	NM_000318	ENSG00000164751	PEX2	peroxisomal biogenesis factor 2	protein-coding
hypo1965	chr10:127410002-127420000	intron (NM_015608, intron 6 of 23)	NR_110859	26098	NM_015608	ENSG00000107938	EDRF1	erythroid differentiation regulatory factor 1	protein-coding
hypo1966	chr14:105410002-105420000	exon (NM_138420, exon 7 of 7)	NM_138790	122618	NM_138790	ENSG00000166428	PLD4	phospholipase D family member 4	protein-coding
hypo1967	chr5:28780002-28790000	Intergenic	NR_033961	729862	NR_033961		LSP1P3	lymphocyte-specific protein 1 pseudogene 3	pseudo
hypo1968	chr4:83110002-83120000	Intergenic	NM_031369	3184	NM_002138	ENSG00000138668	HNRNPD	heterogeneous nuclear ribonucleoprotein D	protein-coding
hypo1969	chr1:35650002-35660000	intron (NM_005066, intron 4 of 9)	NM_005066	6421	NM_005066	ENSG00000116560	SFPQ	splicing factor proline and glutamine rich	protein-coding
hypo197	chr20:31160002-31170000	intron (NM_001256798, intron 1 of 10)	NM_001256798	140688	NM_080616	ENSG00000197183	NOL4L	nucleolar protein 4 like	protein-coding
hypo1970	chr9:5720002-5730000	intron (NM_020829, intron 6 of 25)	NM_001135920	57589	NM_020829	ENSG00000107036	RIC1	RIC1 homolog, RAB6A GEF complex partner 1	protein-coding
hypo1971	chr12:2180002-2190000	intron (NM_001129830, intron 1 of 47)	NM_199460	775	NM_000719	ENSG00000151067	CACNA1C	calcium voltage-gated channel subunit alpha1 C	protein-coding
hypo1972	chr1:232140002-232150000	3' UTR (NM_001164538, exon 11 of 11)	NR_126441	104472714	NR_126441	ENSG00000226758	DISC1-IT1	DISC1 intronic transcript 1	ncRNA
hypo1973	chr11:28700002-28710000	Intergenic	NR_107035	102466876	NR_107035	ENSG00000273912	MIR8068	microRNA 8068	ncRNA
hypo1974	chr2:228710002-228720000	Intergenic	NR_138459	164781	NM_178821	ENSG00000123977	DAW1	dynein assembly factor with WD repeats 1	protein-coding
hypo1975	chr7:66760002-66770000	intron (NR_022007, intron 1 of 4)	NR_046297	5382	NR_022007		PMS2P4	PMS1 homolog 2, mismatch repair system component pseudogene 4	pseudo
hypo1976	chr4:156260002-156270000	3' UTR (NM_001039580, exon 14 of 14)	NR_125937	102724776	NR_125937	ENSG00000250910	LOC102724776	uncharacterized LOC102724776	ncRNA
hypo1977	chrX:48730002-48740000	Intergenic	NM_144495	10084	NM_005710	ENSG00000102103	PQBP1	polyglutamine binding protein 1	protein-coding
hypo1978	chr12:133730002-133740000	3' UTR (NM_015394, exon 5 of 5)	NM_152943	10795	NM_003415	ENSG00000090612	ZNF268	zinc finger protein 268	protein-coding
hypo1979	chr6:67750002-67760000	Intergenic	NR_125869	102723883	NR_125869	ENSG00000223504	LOC102723883	uncharacterized LOC102723883	ncRNA
hypo198	chr1:235510002-235520000	Intergenic	NM_001287802	6905	NM_003193	ENSG00000116957	TBCE	tubulin folding cofactor E	protein-coding
hypo1980	chr15:22290002-22300000	intron (NR_110480, intron 3 of 8)	NR_110481	101927079	NR_110116		LOC101927079	uncharacterized LOC101927079	ncRNA
hypo1981	chr10:15570002-15580000	intron (NM_003638, intron 27 of 29)	NM_001010924	221061	NM_001010924	ENSG00000148468	FAM171A1	family with sequence similarity 171 member A1	protein-coding
hypo1982	chr18:42780002-42790000	Intergenic	NM_001242692	8170	NM_007163	ENSG00000132874	SLC14A2	solute carrier family 14 member 2	protein-coding
hypo1983	chr3:188300002-188310000	intron (NM_001167671, intron 5 of 10)	NR_046623	100873917	NR_046623	ENSG00000224563	LPP-AS1	LPP antisense RNA 1	ncRNA
hypo1984	chr10:20820002-20830000	Intergenic	NR_039822	100616383	NR_039822	ENSG00000265372	MIR4675	microRNA 4675	ncRNA
hypo1985	chr11:94280002-94290000	intron (NR_135094, intron 3 of 3)	NM_002033	2526	NM_002033	ENSG00000196371	FUT4	fucosyltransferase 4	protein-coding
hypo1986	chr2:117880002-117890000	Intergenic	NM_006773	8886	NM_006773	ENSG00000088205	DDX18	DEAD-box helicase 18	protein-coding
hypo1987	chr2:199250002-199260000	Intergenic	NR_110267	101927619	NR_110267		LINC01923	long intergenic non-protein coding RNA 1923	ncRNA
hypo1988	chr21:38630002-38640000	intron (NM_001331022, intron 1 of 6)	NM_006052	10311	NM_006052	ENSG00000157538	DSCR3	DSCR3 arrestin fold containing	protein-coding
hypo1989	chr5:156220002-156230000	Intergenic	NR_038443	153743	NM_206858	ENSG00000231989	PPP1R2P3	protein phosphatase 1 regulatory inhibitor subunit 2 pseudogene 3	pseudo
hypo199	chr17:63670002-63680000	intron (NM_001199165, intron 24 of 26)	NM_004655	8313	NM_004655	ENSG00000168646	AXIN2	axin 2	protein-coding
hypo1990	chr19:8890002-8900000	Intergenic	NM_001304350	148156	NM_144693	ENSG00000167785	ZNF558	zinc finger protein 558	protein-coding
hypo1991	chrX:63600002-63610000	intron (NM_017677, intron 1 of 13)	NM_017677	55613	NM_017677	ENSG00000102043	MTMR8	myotubularin related protein 8	protein-coding
hypo1992	chr2:212130002-212140000	Intergenic	NR_002763	29034	NR_002763	ENSG00000280837	CPS1-IT1	CPS1 intronic transcript 1	ncRNA
hypo1993	chr2:8960002-8970000	intron (NM_020738, intron 2 of 29)	NM_020738	57498	NM_020738	ENSG00000134313	KIDINS220	kinase D interacting substrate 220	protein-coding
hypo1994	chr8:87890002-87900000	intron (NM_173538, intron 1 of 10)	NM_173538	168975	NM_173538	ENSG00000176571	CNBD1	cyclic nucleotide binding domain containing 1	protein-coding
hypo1995	chr1:174610002-174620000	intron (NM_014857, intron 14 of 20)	NM_001330989	9910	NM_014857	ENSG00000152061	RABGAP1L	RAB GTPase activating protein 1 like	protein-coding
hypo1996	chrX:47520002-47530000	Intergenic	NM_004182	8409	NM_004182	ENSG00000126756	UXT	ubiquitously expressed prefoldin like chaperone	protein-coding
hypo1997	chr3:144690002-144700000	Intergenic	NM_001134470	205428	NM_173552	ENSG00000181744	C3orf58	chromosome 3 open reading frame 58	protein-coding
hypo1998	chr4:102750002-102760000	intron (NM_017935, intron 2 of 16)	NM_001083907	55024	NM_017935	ENSG00000153064	BANK1	B-cell scaffold protein with ankyrin repeats 1	protein-coding
hypo1999	chr12:79130002-79140000	Intergenic	NM_001135805	6857	NM_005639	ENSG00000067715	SYT1	synaptotagmin 1	protein-coding
hypo2	chr22:35480002-35490000	Intergenic	NM_001303508	91464	NM_001008494	ENSG00000175329	ISX	intestine specific homeobox	protein-coding
hypo20	chr16:7410002-7420000	intron (NM_145892, intron 1 of 12)	NM_145893	54715	NM_018723	ENSG00000078328	RBFOX1	RNA binding protein, fox-1 homolog 1	protein-coding
hypo200	chr20:35920002-35930000	intron (NM_001003897, intron 1 of 2)	NM_001003897	63905	NM_022077	ENSG00000101363	MANBAL	mannosidase beta like	protein-coding
hypo2000	chr7:72250002-72260000	intron (NM_001145440, intron 6 of 14)	NM_001145440	441250	NM_001145440	ENSG00000277149	TYW1B	tRNA-yW synthesizing protein 1 homolog B	protein-coding
hypo2001	chr6:150290002-150300000	TTS (NM_001317089)	NM_025218	80329	NM_025218	ENSG00000111981	ULBP1	UL16 binding protein 1	protein-coding
hypo2002	chr9:118900002-118910000	Intergenic	NM_002581	5069	NM_002581	ENSG00000182752	PAPPA	pappalysin 1	protein-coding
hypo2003	chr13:35370002-35380000	Intergenic	NM_015678	26960	NM_015678	ENSG00000172915	NBEA	neurobeachin	protein-coding
hypo2004	chr2:230270002-230280000	intron (NM_139072, intron 9 of 12)	NM_017933	55022	NM_017933	ENSG00000153823	PID1	phosphotyrosine interaction domain containing 1	protein-coding
hypo2005	chrX:68260002-68270000	Intergenic	NM_145119	64219	NM_022368	ENSG00000181191	PJA1	praja ring finger ubiquitin ligase 1	protein-coding
hypo2006	chr4:155950002-155960000	Intergenic	NM_000910	4887	NM_000910	ENSG00000185149	NPY2R	neuropeptide Y receptor Y2	protein-coding
hypo2007	chr8:86400002-86410000	Intergenic	NR_121630	100996348	NR_121630	ENSG00000253549	CA3-AS1	CA3 antisense RNA 1	ncRNA
hypo2008	chr18:70280002-70290000	Intergenic	NM_182511	147381	NM_182511	ENSG00000141668	CBLN2	cerebellin 2 precursor	protein-coding
hypo2009	chr14:19800002-19810000	Intergenic	NR_133911	106480334	NR_133911	ENSG00000232775	BMS1P22	BMS1, ribosome biogenesis factor pseudogene 22	pseudo
hypo201	chr7:71130002-71140000	exon (NM_022479, exon 8 of 11)	NR_037477	100500836	NR_037477	ENSG00000265878	MIR3914-1	microRNA 3914-1	ncRNA
hypo2010	chr14:92160002-92170000	intron (NM_024764, intron 7 of 26)	NM_024764	79820	NM_024764	ENSG00000133962	CATSPERB	cation channel sperm associated auxiliary subunit beta	protein-coding
hypo2011	chr8:5450002-5460000	Intergenic	NM_033225	64478	NM_033225	ENSG00000183117	CSMD1	CUB and Sushi multiple domains 1	protein-coding
hypo2012	chr22:24590002-24600000	Intergenic	NM_019601	56241	NM_019601	ENSG00000099994	SUSD2	sushi domain containing 2	protein-coding
hypo2013	chr4:160670002-160680000	Intergenic	NM_014247	9693	NM_014247	ENSG00000109756	RAPGEF2	Rap guanine nucleotide exchange factor 2	protein-coding
hypo2014	chr12:41100002-41110000	intron (NM_001256063, intron 1 of 15)	NM_001843	1272	NM_001843	ENSG00000018236	CNTN1	contactin 1	protein-coding
hypo2015	chr22:26450002-26460000	Intergenic	NM_001184776	23544	NM_021115	ENSG00000100095	SEZ6L	seizure related 6 homolog like	protein-coding
hypo2016	chr6:117420002-117430000	Intergenic	NM_153453	245806	NM_153453	ENSG00000170162	VGLL2	vestigial like family member 2	protein-coding
hypo2017	chr13:52840002-52850000	Intergenic	NR_120400	103191607	NR_120400	ENSG00000271564	LOC103191607	uncharacterized LOC103191607	ncRNA
hypo2018	chr7:30670002-30680000	Intergenic	NM_002047	2617	NM_002047	ENSG00000106105	GARS	glycyl-tRNA synthetase	protein-coding
hypo2019	chr17:6130002-6140000	Intergenic	NM_015253	23302	NM_015253	ENSG00000179314	WSCD1	WSC domain containing 1	protein-coding
hypo202	chr12:109730002-109740000	intron (NM_213596, intron 2 of 9)	NM_213596	121643	NM_213596	ENSG00000139445	FOXN4	forkhead box N4	protein-coding
hypo2020	chr7:3450002-3460000	intron (NM_152744, intron 1 of 44)	NM_152744	221935	NM_152744	ENSG00000146555	SDK1	sidekick cell adhesion molecule 1	protein-coding
hypo2021	chr11:127460002-127470000	Intergenic	NR_120580	101929497	NR_120580	ENSG00000273409	LOC101929497	uncharacterized LOC101929497	ncRNA
hypo2022	chrX:146590002-146600000	Intergenic	NR_030239	574517	NR_030239	ENSG00000207866	MIR514A2	microRNA 514a-2	ncRNA
hypo2023	chr9:96210002-96220000	non-coding (NR_136231, exon 1 of 4)	NR_136230	158293	NM_198841	ENSG00000188938	FAM120AOS	family with sequence similarity 120A opposite strand	protein-coding
hypo2024	chrX:18670002-18680000	intron (NM_000330, intron 2 of 5)	NM_000330	6247	NM_000330	ENSG00000102104	RS1	retinoschisin 1	protein-coding
hypo2025	chr1:90490002-90500000	3' UTR (NM_181781, exon 10 of 10)	NM_001320185	284695	NM_181781	ENSG00000162664	ZNF326	zinc finger protein 326	protein-coding
hypo2026	chrX:17460002-17470000	intron (NM_001291867, intron 1 of 8)	NR_039925	100616249	NR_039925	ENSG00000265465	MIR4768	microRNA 4768	ncRNA
hypo2027	chrX:19380002-19390000	intron (NM_001001671, intron 25 of 28)	NM_000284	5160	NM_000284	ENSG00000131828	PDHA1	pyruvate dehydrogenase (lipoamide) alpha 1	protein-coding
hypo2028	chr11:98620002-98630000	Intergenic	NM_001243271	53942	NM_014361	ENSG00000149972	CNTN5	contactin 5	protein-coding
hypo2029	chr2:13570002-13580000	Intergenic	NR_038434	100506474	NR_038434	ENSG00000225649	LOC100506474	uncharacterized LOC100506474	ncRNA
hypo203	chr9:102700002-102710000	intron (NM_017919, intron 3 of 7)	NM_017919	55014	NM_017919	ENSG00000136874	STX17	syntaxin 17	protein-coding
hypo2030	chr6:112080002-112090000	intron (NM_002037, intron 3 of 13)	NM_153048	2534	NM_002037	ENSG00000010810	FYN	FYN proto-oncogene, Src family tyrosine kinase	protein-coding
hypo2031	chr5:45600002-45610000	intron (NM_021072, intron 2 of 7)	NM_021072	348980	NM_021072	ENSG00000164588	HCN1	hyperpolarization activated cyclic nucleotide gated potassium channel 1	protein-coding
hypo2032	chr12:74310002-74320000	Intergenic	NR_038300	100507377	NR_038300	ENSG00000251138	LOC100507377	uncharacterized LOC100507377	ncRNA
hypo2033	chr7:145690002-145700000	Intergenic	NM_014141	26047	NM_014141	ENSG00000174469	CNTNAP2	contactin associated protein-like 2	protein-coding
hypo2034	chr7:80850002-80860000	Intergenic	NM_006379	10512	NM_006379	ENSG00000075223	SEMA3C	semaphorin 3C	protein-coding
hypo2035	chr18:26550002-26560000	Intergenic	NM_001792	1000	NM_001792	ENSG00000170558	CDH2	cadherin 2	protein-coding
hypo2036	chr15:65900002-65910000	intron (NM_001301033, intron 2 of 11)	NM_001301033	9187	NM_004727	ENSG00000074621	SLC24A1	solute carrier family 24 member 1	protein-coding
hypo2037	chrX:122760002-122770000	intron (NM_001081550, intron 22 of 38)	NM_001081550	57187	NM_020449	ENSG00000125676	THOC2	THO complex 2	protein-coding
hypo2038	chr3:172760002-172770000	intron (NM_031955, intron 3 of 10)	NM_031955	83893	NM_031955	ENSG00000144962	SPATA16	spermatogenesis associated 16	protein-coding
hypo2039	chr12:58430002-58440000	Intergenic	NR_135022	105369785	NR_135022	ENSG00000257541	LOC105369785	uncharacterized LOC105369785	ncRNA
hypo204	chr7:73760002-73770000	intron (NM_003388, intron 3 of 16)	NM_003388	7461	NM_003388	ENSG00000106665	CLIP2	CAP-Gly domain containing linker protein 2	protein-coding
hypo2040	chr6:8570002-8580000	intron (NR_038980, intron 3 of 4)	NR_004855	728655	NR_004855	ENSG00000251164	HULC	hepatocellular carcinoma up-regulated long non-coding RNA	ncRNA
hypo2041	chrX:58480002-58490000	Intergenic	NM_007156	7789	NM_007156	ENSG00000198205	ZXDA	zinc finger, X-linked, duplicated A	protein-coding
hypo2042	chr7:136630002-136640000	intron (NR_046103, intron 2 of 3)	NR_030165	574443	NR_030165	ENSG00000207597	MIR490	microRNA 490	ncRNA
hypo2043	chr2:228850002-228860000	intron (NM_001142644, intron 11 of 11)	NM_178821	164781	NM_178821	ENSG00000123977	DAW1	dynein assembly factor with WD repeats 1	protein-coding
hypo2044	chr2:90040002-90050000	Intergenic	NR_039635	100616399	NR_039635	ENSG00000265510	MIR4436A	microRNA 4436a	ncRNA
hypo2045	chr6:144450002-144460000	Intergenic	NM_003764	8676	NM_003764	ENSG00000135604	STX11	syntaxin 11	protein-coding
hypo2046	chr13:49230002-49240000	intron (NM_001308471, intron 1 of 1)	NM_001308470	57105	NM_020377	ENSG00000152207	CYSLTR2	cysteinyl leukotriene receptor 2	protein-coding
hypo2047	chr3:105600002-105610000	Intergenic	NR_135810	868	NM_170662	ENSG00000114423	CBLB	Cbl proto-oncogene B	protein-coding
hypo2048	chr7:76780002-76790000	intron (NM_020879, intron 1 of 18)	NM_020879	57639	NM_020879	ENSG00000135205	CCDC146	coiled-coil domain containing 146	protein-coding
hypo2049	chr5:106480002-106490000	Intergenic	NR_104671	102467213	NR_104671	ENSG00000251027	LINC01950	long intergenic non-protein coding RNA 1950	ncRNA
hypo205	chr14:100830002-100840000	intron (NM_213645, intron 1 of 9)	NM_004184	7453	NM_004184	ENSG00000140105	WARS	tryptophanyl-tRNA synthetase	protein-coding
hypo2050	chr6:132920002-132930000	Intergenic	NR_028511	9288	NR_028511	ENSG00000179073	TAAR3	trace amine associated receptor 3 (gene/pseudogene)	pseudo
hypo2051	chr4:103350002-103360000	intron (NR_136202, intron 2 of 4)	NM_003998	4790	NM_003998	ENSG00000109320	NFKB1	nuclear factor kappa B subunit 1	protein-coding
hypo2052	chr3:187840002-187850000	Intergenic	NM_001167672	4026	NM_005578	ENSG00000145012	LPP	LIM domain containing preferred translocation partner in lipoma	protein-coding
hypo2053	chrX:99190002-99200000	promoter-TSS (NR_024608)	NR_024608	442459	NM_001127438		XRCC6P5	X-ray repair cross complementing 6 pseudogene 5	pseudo
hypo2054	chr9:73940002-73950000	Intergenic	NM_001007471	80036	NM_020952	ENSG00000083067	TRPM3	transient receptor potential cation channel subfamily M member 3	protein-coding
hypo2055	chrX:77280002-77290000	intron (NM_001282224, intron 14 of 21)	NM_001029891	441531	NM_001029891	ENSG00000226784	PGAM4	phosphoglycerate mutase family member 4	protein-coding
hypo2056	chr5:175390002-175400000	exon (NM_032361, exon 1 of 6)	NM_032361	84321	NM_032361	ENSG00000051596	THOC3	THO complex 3	protein-coding
hypo2057	chr8:33430002-33440000	Intergenic	NM_024787	79845	NM_024787	ENSG00000133874	RNF122	ring finger protein 122	protein-coding
hypo2058	chr8:69180002-69190000	Intergenic	NM_001195639	116328	NM_052958	ENSG00000165084	C8orf34	chromosome 8 open reading frame 34	protein-coding
hypo2059	chr6:72100002-72110000	Intergenic	NR_029504	407029	NR_029504	ENSG00000207827	MIR30A	microRNA 30a	ncRNA
hypo206	chr2:74900002-74910000	intron (NM_001271661, intron 8 of 9)	NR_073398	10505	NM_004263	ENSG00000135622	SEMA4F	ssemaphorin 4F	protein-coding
hypo2060	chr2:87510002-87520000	Intergenic	NR_039928	100616370	NR_039928	ENSG00000264793	MIR4771-1	microRNA 4771-1	ncRNA
hypo2061	chr3:142170002-142180000	intron (NM_001184, intron 45 of 46)	NM_019001	54464	NM_019001	ENSG00000114127	XRN1	5'-3' exoribonuclease 1	protein-coding
hypo2062	chr13:104150002-104160000	Intergenic	NR_126374	104326190	NR_126374	ENSG00000234551	LINC01309	long intergenic non-protein coding RNA 1309	ncRNA
hypo2063	chr3:24320002-24330000	intron (NM_000461, intron 2 of 9)	NR_121667	101927854	NR_121667		LOC101927854	uncharacterized LOC101927854	ncRNA
hypo2064	chr13:63470002-63480000	Intergenic	NR_120403	100874176	NR_047029		LINC00448	long intergenic non-protein coding RNA 448	ncRNA
hypo2065	chr9:69500002-69510000	Intergenic	NR_136310	105379252	NR_136310	ENSG00000274628	LOC105379252	family with sequence similarity 95 member B1-like	ncRNA
hypo2066	chrX:6410002-6420000	Intergenic	NM_016379	51481	NM_016379	ENSG00000169059	VCX3A	variable charge, X-linked 3A	protein-coding
hypo2067	chr17:45970002-45980000	TTS (NR_103856)	NM_003110	6668	NM_003110	ENSG00000167182	SP2	Sp2 transcription factor	protein-coding
hypo2068	chr5:8050002-8060000	Intergenic	NR_134481	4552	NM_002454	ENSG00000124275	MTRR	5-methyltetrahydrofolate-homocysteine methyltransferase reductase	protein-coding
hypo2069	chr11:31620002-31630000	intron (NM_001288726, intron 4 of 11)	NM_001288725	26610	NM_019040	ENSG00000109911	ELP4	elongator acetyltransferase complex subunit 4	protein-coding
hypo207	chr12:49150002-49160000	intron (NR_029449, intron 2 of 3)	NR_039850	100616262	NR_039850	ENSG00000264201	MIR4701	microRNA 4701	ncRNA
hypo2070	chr14:61830002-61840000	intron (NM_006255, intron 1 of 13)	NM_006255	5583	NM_006255	ENSG00000027075	PRKCH	protein kinase C eta	protein-coding
hypo2071	chr2:83110002-83120000	Intergenic	NR_033423	1720	NR_033423		DHFRP3	dihydrofolate reductase pseudogene 3	pseudo
hypo2072	chrX:141480002-141490000	Intergenic	NM_016249	51438	NM_016249	ENSG00000046774	MAGEC2	MAGE family member C2	protein-coding
hypo2073	chr12:78220002-78230000	promoter-TSS (NM_001024383)	NM_014903	89795	NM_014903	ENSG00000067798	NAV3	neuron navigator 3	protein-coding
hypo2074	chr1:173410002-173420000	intron (NR_125960, intron 1 of 1)	NR_125960	101928673	NR_125960	ENSG00000203739	LOC101928673	uncharacterized LOC101928673	ncRNA
hypo2075	chr5:123300002-123310000	Intergenic	NM_001044723	1456	NM_004384	ENSG00000151292	CSNK1G3	casein kinase 1 gamma 3	protein-coding
hypo2076	chrX:145270002-145280000	Intergenic	NR_030581	100126341	NR_030581	ENSG00000216056	MIR891A	microRNA 891a	ncRNA
hypo2077	chr1:152190002-152200000	intron (NM_001009931, intron 2 of 2)	NM_001009931	388697	NM_001009931	ENSG00000197915	HRNR	hornerin	protein-coding
hypo2078	chr2:200960002-200970000	Intergenic	NM_001039693	129450	NM_152382	ENSG00000162971	TYW5	tRNA-yW synthesizing protein 5	protein-coding
hypo2079	chr21:34350002-34360000	Intergenic	NR_135522	102724502	NR_135522	ENSG00000228961	LOC102724502	uncharacterized LOC102724502	ncRNA
hypo208	chr4:41600002-41610000	intron (NM_001330786, intron 2 of 22)	NM_001112720	22998	NM_014988	ENSG00000064042	LIMCH1	LIM and calponin homology domains 1	protein-coding
hypo2080	chr5:128070002-128080000	Intergenic	NM_001999	2201	NM_001999	ENSG00000138829	FBN2	fibrillin 2	protein-coding
hypo2081	chr6:63720002-63730000	Intergenic	NM_016571	51557	NM_016571	ENSG00000146166	LGSN	lengsin, lens protein with glutamine synthetase domain	protein-coding
hypo2082	chr6:167590002-167600000	intron (NM_001145121, intron 7 of 7)	NM_001145121	401285	NM_001013683	ENSG00000166984	TCP10L2	t-complex 10-like 2	protein-coding
hypo2083	chr12:52220002-52230000	intron (NM_001013690, intron 1 of 1)	NM_001013690	401720	NM_001013690		FIGNL2	fidgetin like 2	protein-coding
hypo2084	chr21:18290002-18300000	Intergenic	NR_029694	406912	NR_029694	ENSG00000207863	MIR125B2	microRNA 125b-2	ncRNA
hypo2085	chr13:32370002-32380000	intron (NM_001166058, intron 16 of 16)	NR_027062	196549	NM_145293		EEF1DP3	eukaryotic translation elongation factor 1 delta pseudogene 3	pseudo
hypo2086	chr2:5150002-5160000	Intergenic	NR_034134	727982	NR_034134	ENSG00000231532	LINC01249	long intergenic non-protein coding RNA 1249	ncRNA
hypo2087	chr9:44060002-44070000	Intergenic	NR_131213	105500239	NR_131213		XLOC_007697	uncharacterized LOC105500239	ncRNA
hypo2088	chr2:191230002-191240000	intron (NM_002194, intron 5 of 5)	NM_001128928	3628	NM_002194	ENSG00000151689	INPP1	inositol polyphosphate-1-phosphatase	protein-coding
hypo2089	chr9:120880002-120890000	Intergenic	NM_138554	7099	NM_003266	ENSG00000136869	TLR4	toll like receptor 4	protein-coding
hypo209	chr9:111670002-111680000	intron (NM_001330749, intron 8 of 34)	NM_001330749	8518	NM_003640	ENSG00000070061	IKBKAP	inhibitor of kappa light polypeptide gene enhancer in B-cells, kinase complex-associated protein	protein-coding
hypo2090	chrX:15870002-15880000	Intergenic	NM_003916	8905	NM_003916	ENSG00000182287	AP1S2	adaptor related protein complex 1 sigma 2 subunit	protein-coding
hypo2091	chr2:226740002-226750000	Intergenic	NR_046102	646736	NR_046102		LOC646736	uncharacterized LOC646736	ncRNA
hypo2092	chrX:25590002-25600000	Intergenic	NM_139058	170302	NM_139058	ENSG00000004848	ARX	aristaless related homeobox	protein-coding
hypo2093	chr1:46100002-46110000	intron (NM_021639, intron 8 of 12)	NR_026768	728963	NR_026768		RPS15AP10	ribosomal protein S15a pseudogene 10	pseudo
hypo2094	chrX:145900002-145910000	Intergenic	NM_001244892	100133053	NM_001244892	ENSG00000235699	CXorf51B	chromosome X open reading frame 51B	protein-coding
hypo2095	chrX:67340002-67350000	intron (NM_002547, intron 15 of 24)	NM_002547	4983	NM_002547	ENSG00000079482	OPHN1	oligophrenin 1	protein-coding
hypo2096	chr7:51930002-51940000	Intergenic	NM_001287436	23242	NM_015198	ENSG00000106078	COBL	cordon-bleu WH2 repeat protein	protein-coding
hypo2097	chr21:15530002-15540000	intron (NM_001303000, intron 7 of 9)	NM_198996	149998	NM_145317	ENSG00000188992	LIPI	lipase I	protein-coding
hypo2098	chr2:117050002-117060000	Intergenic	NM_001321913	57628	NM_020868	ENSG00000175497	DPP10	dipeptidyl peptidase like 10	protein-coding
hypo2099	chr13:56010002-56020000	Intergenic	NR_049804	100846996	NR_049804	ENSG00000264387	MIR5007	microRNA 5007	ncRNA
hypo21	chr6:159300002-159310000	intron (NM_001302840, intron 2 of 3)	NM_001195032	100130967	NM_001195032		C6orf99	chromosome 6 open reading frame 99	protein-coding
hypo210	chr8:18780002-18790000	intron (NM_015310, intron 2 of 15)	NM_015310	23362	NM_015310	ENSG00000156011	PSD3	pleckstrin and Sec7 domain containing 3	protein-coding
hypo2100	chr2:71290002-71300000	promoter-TSS (NM_017567)	NM_017567	55577	NM_017567	ENSG00000124357	NAGK	N-acetylglucosamine kinase	protein-coding
hypo2101	chrX:14710002-14720000	intron (NM_001171942, intron 10 of 10)	NM_001118886	2742	NM_002063	ENSG00000101958	GLRA2	glycine receptor alpha 2	protein-coding
hypo2102	chr18:4870002-4880000	Intergenic	NM_001145194	642597	NM_001145194	ENSG00000231824	AKAIN1	A-kinase anchor inhibitor 1	protein-coding
hypo2103	chr14:23900002-23910000	promoter-TSS (NM_000257)	NM_000257	4625	NM_000257	ENSG00000092054	MYH7	myosin heavy chain 7	protein-coding
hypo2104	chr5:96830002-96840000	Intergenic	NR_105028	102546227	NR_105028	ENSG00000250331	LINC01340	long intergenic non-protein coding RNA 1340	ncRNA
hypo2105	chrX:94100002-94110000	Intergenic	NR_031667	100313772	NR_031667	ENSG00000221187	MIR548M	microRNA 548m	ncRNA
hypo2106	chr17:12510002-12520000	intron (NR_034145, intron 3 of 3)	NM_153604	93649	NM_153604	ENSG00000141052	MYOCD	myocardin	protein-coding
hypo2107	chr10:90260002-90270000	intron (NM_001031709, intron 4 of 6)	NM_018363	55328	NM_018363	ENSG00000184719	RNLS	renalase, FAD dependent amine oxidase	protein-coding
hypo2108	chr3:119660002-119670000	intron (NM_002093, intron 3 of 11)	NM_002093	2932	NM_002093	ENSG00000082701	GSK3B	glycogen synthase kinase 3 beta	protein-coding
hypo2109	chr5:58430002-58440000	intron (NM_001165899, intron 7 of 16)	NM_001197222	5144	NM_006203	ENSG00000113448	PDE4D	phosphodiesterase 4D	protein-coding
hypo211	chr14:56690002-56700000	intron (NM_021255, intron 2 of 5)	NM_021255	57161	NM_021255	ENSG00000139946	PELI2	pellino E3 ubiquitin protein ligase family member 2	protein-coding
hypo2110	chr10:59300002-59310000	Intergenic	NR_037490	100500834	NR_037490	ENSG00000264747	MIR3924	microRNA 3924	ncRNA
hypo2111	chr3:152010002-152020000	intron (NM_001314057, intron 1 of 11)	NM_207297	4154	NM_021038	ENSG00000152601	MBNL1	muscleblind like splicing regulator 1	protein-coding
hypo2112	chrX:26810002-26820000	Intergenic	NR_001559	139538	NR_001559	ENSG00000259849	VENTXP1	VENT homeobox pseudogene 1	pseudo
hypo2113	chrX:98680002-98690000	Intergenic	NR_024608	442459	NM_001127438		XRCC6P5	X-ray repair cross complementing 6 pseudogene 5	pseudo
hypo2114	chr9:22790002-22800000	intron (NR_038977, intron 4 of 5)	NR_038977	441389	NR_038977	ENSG00000234840	LINC01239	long intergenic non-protein coding RNA 1239	ncRNA
hypo2115	chr5:148180002-148190000	Intergenic	NM_000024	154	NM_000024	ENSG00000169252	ADRB2	adrenoceptor beta 2	protein-coding
hypo2116	chr2:146940002-146950000	Intergenic	NR_026904	728773	NR_026904		PABPC1P2	poly(A) binding protein cytoplasmic 1 pseudogene 2	pseudo
hypo2117	chr12:53840002-53850000	promoter-TSS (NM_001128912)	NM_001128913	5094	NM_005016	ENSG00000197111	PCBP2	poly(rC) binding protein 2	protein-coding
hypo2118	chr6:102260002-102270000	intron (NM_001166247, intron 8 of 16)	NM_021956	2898	NM_021956	ENSG00000164418	GRIK2	glutamate ionotropic receptor kainate type subunit 2	protein-coding
hypo2119	chr10:90690002-90700000	non-coding (NR_125373, exon 3 of 5)	NR_125373	100132116	NR_125373	ENSG00000180139	ACTA2-AS1	ACTA2 antisense RNA 1	ncRNA
hypo212	chr10:37150002-37160000	Intergenic	NM_052997	91074	NM_052997	ENSG00000148513	ANKRD30A	ankyrin repeat domain 30A	protein-coding
hypo2120	chr6:94280002-94290000	Intergenic	NR_015362	643432	NR_015362		TSG1	tumor suppressor TSG1	ncRNA
hypo2121	chr2:112060002-112070000	intron (NR_136165, intron 2 of 3)	NR_039636	100616341	NR_039636	ENSG00000266139	MIR4435-2	microRNA 4435-2	ncRNA
hypo2122	chrX:152220002-152230000	intron (NM_013364, intron 1 of 1)	NM_013364	29944	NM_013364	ENSG00000183837	PNMA3	paraneoplastic Ma antigen 3	protein-coding
hypo2123	chr11:49420002-49430000	Intergenic	NR_027044	440040	NR_027044	ENSG00000205035	LOC440040	glutamate metabotropic receptor 5 pseudogene	pseudo
hypo2124	chr5:27660002-27670000	Intergenic	NR_038848	643401	NR_038848	ENSG00000250337	LINC01021	long intergenic non-protein coding RNA 1021	ncRNA
hypo2125	chr2:57420002-57430000	Intergenic	NM_001288838	7444	NM_006296	ENSG00000028116	VRK2	vaccinia related kinase 2	protein-coding
hypo2126	chr13:47600002-47610000	Intergenic	NM_001165947	3356	NM_000621	ENSG00000102468	HTR2A	5-hydroxytryptamine receptor 2A	protein-coding
hypo2127	chr16:16560002-16570000	Intergenic	NM_001282507	101059938	NM_001282507	ENSG00000214967	NPIPA7	nuclear pore complex interacting protein family member A7	protein-coding
hypo2128	chrX:114280002-114290000	Intergenic	NM_000640	3598	NM_000640	ENSG00000123496	IL13RA2	interleukin 13 receptor subunit alpha 2	protein-coding
hypo2129	chr14:19060002-19070000	Intergenic	NM_001013354	440153	NM_001013354	ENSG00000257115	OR11H12	olfactory receptor family 11 subfamily H member 12	protein-coding
hypo213	chr17:26250002-26260000	Intergenic	NM_001076680	201229	NM_001076680	ENSG00000232859	LYRM9	LYR motif containing 9	protein-coding
hypo2130	chr1:81030002-81040000	intron (NR_125940, intron 2 of 3)	NR_125940	101927412	NR_125940	ENSG00000234184	LINC01781	long intergenic non-protein coding RNA 1781	ncRNA
hypo2131	chr4:22700002-22710000	intron (NR_102356, intron 1 of 2)	NR_102356	57733	NM_020973	ENSG00000249948	GBA3	glucosylceramidase beta 3 (gene/pseudogene)	protein-coding
hypo2132	chr9:122370002-122380000	Intergenic	NM_014618	1620	NM_014618	ENSG00000078725	BRINP1	BMP/retinoic acid inducible neural specific 1	protein-coding
hypo2133	chr15:28560002-28570000	intron (NM_004667, intron 2 of 92)	NM_004667	8924	NM_004667	ENSG00000128731	HERC2	HECT and RLD domain containing E3 ubiquitin protein ligase 2	protein-coding
hypo2134	chr1:79850002-79860000	Intergenic	NM_022159	64123	NM_022159	ENSG00000162618	ADGRL4	adhesion G protein-coupled receptor L4	protein-coding
hypo2135	chr8:72960002-72970000	non-coding (NR_033651, exon 3 of 3)	NM_007332	8989	NM_007332	ENSG00000104321	TRPA1	transient receptor potential cation channel subfamily A member 1	protein-coding
hypo2136	chrX:135460002-135470000	intron (NM_153834, intron 15 of 25)	NM_153834	139378	NM_153834	ENSG00000156920	ADGRG4	adhesion G protein-coupled receptor G4	protein-coding
hypo2137	chr3:187990002-188000000	intron (NM_005578, intron 2 of 10)	NM_001167671	4026	NM_005578	ENSG00000145012	LPP	LIM domain containing preferred translocation partner in lipoma	protein-coding
hypo2138	chr7:15280002-15290000	intron (NM_001004320, intron 12 of 12)	NM_001004320	392636	NM_001004320	ENSG00000187546	AGMO	alkylglycerol monooxygenase	protein-coding
hypo2139	chr12:79270002-79280000	intron (NM_001291901, intron 1 of 9)	NM_001291901	6857	NM_005639	ENSG00000067715	SYT1	synaptotagmin 1	protein-coding
hypo214	chr10:31310002-31320000	intron (NM_182755, intron 1 of 7)	NM_001143768	220929	NM_182755	ENSG00000183621	ZNF438	zinc finger protein 438	protein-coding
hypo2140	chrX:63700002-63710000	Intergenic	NM_017677	55613	NM_017677	ENSG00000102043	MTMR8	myotubularin related protein 8	protein-coding
hypo2141	chr1:103770002-103780000	Intergenic	NM_001854	1301	NM_001854	ENSG00000060718	COL11A1	collagen type XI alpha 1 chain	protein-coding
hypo2142	chrX:149800002-149810000	intron (NM_000252, intron 6 of 14)	NM_003828	8776	NM_003828	ENSG00000063601	MTMR1	myotubularin related protein 1	protein-coding
hypo2143	chrX:78650002-78660000	Intergenic	NM_004867	9452	NM_004867	ENSG00000078596	ITM2A	integral membrane protein 2A	protein-coding
hypo2144	chr1:155220002-155230000	TTS (NM_005698)	NM_001267608	10712	NM_006589	ENSG00000160767	FAM189B	family with sequence similarity 189 member B	protein-coding
hypo2145	chr1:247320002-247330000	intron (NM_003431, intron 1 of 3)	NM_001297568	7678	NM_003431	ENSG00000196418	ZNF124	zinc finger protein 124	protein-coding
hypo2146	chr11:81740002-81750000	intron (NR_120571, intron 5 of 7)	NR_036186	100422823	NR_036186	ENSG00000264110	MIR4300	microRNA 4300	ncRNA
hypo2147	chr11:31630002-31640000	intron (NM_001288725, intron 5 of 10)	NM_001288725	26610	NM_019040	ENSG00000109911	ELP4	elongator acetyltransferase complex subunit 4	protein-coding
hypo2148	chrX:64320002-64330000	Intergenic	NM_001178032	55906	NM_018684	ENSG00000126970	ZC4H2	zinc finger C4H2-type containing	protein-coding
hypo2149	chr13:45270002-45280000	Intergenic	NR_038433	144817	NR_038433	ENSG00000235097	LINC00330	long intergenic non-protein coding RNA 330	ncRNA
hypo215	chr9:83620002-83630000	Intergenic	NM_001303104	7088	NM_005077	ENSG00000196781	TLE1	transducin like enhancer of split 1	protein-coding
hypo2150	chrX:10200002-10210000	3' UTR (NM_001256944, exon 11 of 11)	NM_001830	1183	NM_001830	ENSG00000073464	CLCN4	chloride voltage-gated channel 4	protein-coding
hypo2151	chr1:174640002-174650000	intron (NM_014857, intron 14 of 20)	NM_001330989	9910	NM_014857	ENSG00000152061	RABGAP1L	RAB GTPase activating protein 1 like	protein-coding
hypo2152	chr17:6630002-6640000	Intergenic	NM_177550	284111	NM_177550	ENSG00000141485	SLC13A5	solute carrier family 13 member 5	protein-coding
hypo2153	chr8:5440002-5450000	Intergenic	NM_033225	64478	NM_033225	ENSG00000183117	CSMD1	CUB and Sushi multiple domains 1	protein-coding
hypo2154	chrX:78340002-78350000	Intergenic	NM_032553	84636	NM_032553	ENSG00000147138	GPR174	G protein-coupled receptor 174	protein-coding
hypo2155	chr2:1210002-1220000	intron (NM_018968, intron 9 of 16)	NM_175719	7173	NM_000547	ENSG00000115705	TPO	thyroid peroxidase	protein-coding
hypo2156	chr1:57270002-57280000	intron (NM_001004303, intron 1 of 19)	NM_001004303	199920	NM_001004303	ENSG00000187889	C1orf168	chromosome 1 open reading frame 168	protein-coding
hypo2157	chr1:61060002-61070000	Intergenic	NR_110628	101926964	NR_110628	ENSG00000231252	LOC101926964	uncharacterized LOC101926964	ncRNA
hypo2158	chr13:90720002-90730000	intron (NR_047489, intron 4 of 5)	NR_047489	100874187	NR_047489	ENSG00000261446	LINC00559	long intergenic non-protein coding RNA 559	ncRNA
hypo2159	chr17:3150002-3160000	Intergenic	NR_033795	653166	NM_003552	ENSG00000255095	OR1D4	olfactory receptor family 1 subfamily D member 4 (gene/pseudogene)	pseudo
hypo216	chr8:2580002-2590000	intron (NR_125426, intron 1 of 2)	NR_125425	101927815	NR_125423	ENSG00000254319	LOC101927815	uncharacterized LOC101927815	ncRNA
hypo2160	chrX:14490002-14500000	Intergenic	NM_001118885	2742	NM_002063	ENSG00000101958	GLRA2	glycine receptor alpha 2	protein-coding
hypo2161	chr1:244590002-244600000	intron (NM_001126, intron 4 of 12)	NM_001126	159	NM_001126	ENSG00000035687	ADSS	adenylosuccinate synthase	protein-coding
hypo2162	chr4:70070002-70080000	intron (NM_001073, intron 2 of 5)	NM_001073	10720	NM_001073	ENSG00000213759	UGT2B11	UDP glucuronosyltransferase family 2 member B11	protein-coding
hypo2163	chrX:117230002-117240000	intron (NM_001168301, intron 1 of 7)	NM_001168303	90293	NM_033495	ENSG00000003096	KLHL13	kelch like family member 13	protein-coding
hypo2164	chr2:225720002-225730000	intron (NM_014689, intron 14 of 55)	NM_001290263	55619	NM_014689	ENSG00000135905	DOCK10	dedicator of cytokinesis 10	protein-coding
hypo2165	chrX:133580002-133590000	Intergenic	NM_000194	3251	NM_000194	ENSG00000165704	HPRT1	hypoxanthine phosphoribosyltransferase 1	protein-coding
hypo2166	chrX:51610002-51620000	intron (NM_001005332, intron 1 of 12)	NM_006986	9500	NM_006986	ENSG00000179222	MAGED1	MAGE family member D1	protein-coding
hypo2167	chr22:21620002-21630000	Intergenic	NR_024583	29797	NM_001029950		POM121L8P	POM121 transmembrane nucleoporin like 8, pseudogene	pseudo
hypo2168	chrX:98080002-98090000	Intergenic	NR_024608	442459	NM_001127438		XRCC6P5	X-ray repair cross complementing 6 pseudogene 5	pseudo
hypo2169	chr3:173270002-173280000	intron (NM_014932, intron 2 of 6)	NM_014932	22871	NM_014932	ENSG00000169760	NLGN1	neuroligin 1	protein-coding
hypo217	chr7:137590002-137600000	intron (NM_001318246, intron 4 of 11)	NM_001318246	64764	NM_194071	ENSG00000182158	CREB3L2	cAMP responsive element binding protein 3 like 2	protein-coding
hypo2170	chrX:49040002-49050000	3' UTR (NM_003179, exon 7 of 7)	NM_006150	4007	NM_006150	ENSG00000012211	PRICKLE3	prickle planar cell polarity protein 3	protein-coding
hypo2171	chr11:51590002-51600000	Intergenic	NM_001004703	119749	NM_001004703	ENSG00000185926	OR4C46	olfactory receptor family 4 subfamily C member 46	protein-coding
hypo2172	chrX:20450002-20460000	Intergenic	NM_004586	6197	NM_004586	ENSG00000177189	RPS6KA3	ribosomal protein S6 kinase A3	protein-coding
hypo2173	chrX:111380002-111390000	intron (NM_001004308, intron 2 of 2)	NM_001004308	340595	NM_001004308	ENSG00000187823	ZCCHC16	zinc finger CCHC-type containing 16	protein-coding
hypo2174	chrX:92760002-92770000	Intergenic	NM_004538	4675	NM_004538	ENSG00000186310	NAP1L3	nucleosome assembly protein 1 like 3	protein-coding
hypo2175	chrX:7710002-7720000	Intergenic	NM_013452	26609	NM_013452	ENSG00000182583	VCX	variable charge, X-linked	protein-coding
hypo2176	chr13:38480002-38490000	Intergenic	NM_001135956	7223	NM_003306	ENSG00000133107	TRPC4	transient receptor potential cation channel subfamily C member 4	protein-coding
hypo2177	chr12:81030002-81040000	intron (NM_001145026, intron 32 of 41)	NM_002469	4618	NM_002469	ENSG00000111046	MYF6	myogenic factor 6	protein-coding
hypo2178	chr2:12820002-12830000	Intergenic	NM_021643	28951	NM_021643	ENSG00000071575	TRIB2	tribbles pseudokinase 2	protein-coding
hypo2179	chr10:110480002-110490000	Intergenic	NR_125760	103695365	NR_125760	ENSG00000229981	LINC01435	long intergenic non-protein coding RNA 1435	ncRNA
hypo218	chr19:9340002-9350000	Intergenic	NM_001079935	26648	NM_001079935	ENSG00000237521	OR7E24	olfactory receptor family 7 subfamily E member 24	protein-coding
hypo2180	chr4:21510002-21520000	intron (NM_147182, intron 2 of 8)	NM_001035004	80333	NM_025221	ENSG00000185774	KCNIP4	potassium voltage-gated channel interacting protein 4	protein-coding
hypo2181	chrX:32070002-32080000	intron (NM_004006, intron 44 of 78)	NM_004021	1756	NM_000109	ENSG00000198947	DMD	dystrophin	protein-coding
hypo2182	chr4:183410002-183420000	intron (NM_001080477, intron 3 of 27)	NM_001080477	55714	NM_001080477	ENSG00000218336	TENM3	teneurin transmembrane protein 3	protein-coding
hypo2183	chr2:17620002-17630000	Intergenic	NM_001099218	729475	NM_001099218	ENSG00000214842	RAD51AP2	RAD51 associated protein 2	protein-coding
hypo2184	chr15:20640002-20650000	intron (NR_036432, intron 19 of 25)	NR_036432	283755	NM_001024682	ENSG00000180229	HERC2P3	hect domain and RLD 2 pseudogene 3	pseudo
hypo2185	chr11:51440002-51450000	Intergenic	NM_001005272	81318	NM_001005272	ENSG00000221840	OR4A5	olfactory receptor family 4 subfamily A member 5	protein-coding
hypo2186	chr12:86130002-86140000	Intergenic	NM_005447	9182	NM_005447	ENSG00000198774	RASSF9	Ras association domain family member 9	protein-coding
hypo2187	chr2:216860002-216870000	intron (NM_018000, intron 1 of 4)	NM_018000	55686	NM_018000	ENSG00000118242	MREG	melanoregulin	protein-coding
hypo2188	chr4:28230002-28240000	Intergenic	NR_036237	100422937	NR_036237	ENSG00000283275	MIR4275	microRNA 4275	ncRNA
hypo2189	chrX:117180002-117190000	intron (NM_001168301, intron 1 of 7)	NM_001168299	90293	NM_033495	ENSG00000003096	KLHL13	kelch like family member 13	protein-coding
hypo219	chr14:64200002-64210000	Intergenic	NM_030791	81537	NM_030791	ENSG00000126821	SGPP1	sphingosine-1-phosphate phosphatase 1	protein-coding
hypo2190	chr7:147150002-147160000	intron (NM_014141, intron 10 of 23)	NR_031645	100313895	NR_031645	ENSG00000221442	MIR548F4	microRNA 548f-4	ncRNA
hypo2191	chr1:76380002-76390000	intron (NR_026546, intron 2 of 2)	NR_026546	127247	NM_080868	ENSG00000154007	ASB17	ankyrin repeat and SOCS box containing 17	protein-coding
hypo2192	chr9:80002-90000	intron (NR_121190, intron 2 of 2).2	NR_121190	101929127	NR_121188	ENSG00000277631	PGM5P3-AS1	PGM5P3 antisense RNA 1	ncRNA
hypo2193	chr19:57980002-57990000	exon (NM_001144068, exon 4 of 4)	NM_001024596	400720	NM_001024596	ENSG00000197128	ZNF772	zinc finger protein 772	protein-coding
hypo2194	chr13:70030002-70040000	Intergenic	NR_125752	103689913	NR_125752		LINC00383	long intergenic non-protein coding RNA 383	ncRNA
hypo2195	chr1:171980002-171990000	intron (NM_015569, intron 4 of 20)	NR_036066	100422882	NR_036066	ENSG00000283152	MIR3120	microRNA 3120	ncRNA
hypo2196	chrX:91520002-91530000	intron (NM_001168360, intron 4 of 5)	NM_032968	27328	NM_014522	ENSG00000102290	PCDH11X	protocadherin 11 X-linked	protein-coding
hypo2197	chr1:13700002-13710000	Intergenic	NM_001099850	391003	NM_001099850	ENSG00000279804	PRAMEF18	PRAME family member 18	protein-coding
hypo2198	chr14:86530002-86540000	intron (NR_110155, intron 1 of 3)	NR_110155	101928767	NR_110155		LOC101928767	uncharacterized LOC101928767	ncRNA
hypo2199	chr13:70450002-70460000	intron (NM_020866, intron 5 of 10)	NR_002717	6315	NR_002717		ATXN8OS	ATXN8 opposite strand (non-protein coding)	ncRNA
hypo22	chr12:120140002-120150000	intron (NM_001206999, intron 40 of 47)	NR_031589	100302274	NR_031589	ENSG00000122966	MIR1178	microRNA 1178	ncRNA
hypo220	chr11:84680002-84690000	intron (NM_001142699, intron 6 of 27)	NM_001300983	1740	NM_001364	ENSG00000150672	DLG2	discs large MAGUK scaffold protein 2	protein-coding
hypo2200	chr15:23260002-23270000	Intergenic	NR_024074	283796	NR_024074	ENSG00000277561	GOLGA8IP	golgin A8 family member I, pseudogene	pseudo
hypo2201	chr3:100820002-100830000	Intergenic	NM_015429	25890	NM_015429	ENSG00000154175	ABI3BP	ABI family member 3 binding protein	protein-coding
hypo2202	chr17:65140002-65150000	intron (NM_001330447, intron 19 of 32)	NR_136398	101928021	NR_136398		LOC101928021	uncharacterized LOC101928021	ncRNA
hypo2203	chrX:34070002-34080000	Intergenic	NM_203408	158724	NM_203408	ENSG00000185448	FAM47A	family with sequence similarity 47 member A	protein-coding
hypo2204	chr15:87700002-87710000	Intergenic	NR_135683	102724452	NR_135683	ENSG00000259620	LOC102724452	uncharacterized LOC102724452	ncRNA
hypo2205	chr1:26280002-26290000	Intergenic	NM_000437	5051	NM_000437	ENSG00000158006	PAFAH2	platelet activating factor acetylhydrolase 2	protein-coding
hypo2206	chr1:35620002-35630000	Intergenic	NM_005066	6421	NM_005066	ENSG00000116560	SFPQ	splicing factor proline and glutamine rich	protein-coding
hypo2207	chrX:82930002-82940000	Intergenic	NM_000307	5456	NM_000307	ENSG00000196767	POU3F4	POU class 3 homeobox 4	protein-coding
hypo2208	chr15:48630002-48640000	3' UTR (NM_001948, exon 6 of 6)	NM_001948	1854	NM_001948	ENSG00000128951	DUT	deoxyuridine triphosphatase	protein-coding
hypo2209	chr5:34190002-34200000	Intergenic	NR_037951	100534612	NR_037951	ENSG00000273294	C1QTNF3-AMACR	C1QTNF3-AMACR readthrough (NMD candidate)	ncRNA
hypo221	chr7:93020002-93030000	Intergenic	NR_030388	724023	NR_030388	ENSG00000208014	MIR653	microRNA 653	ncRNA
hypo2210	chr2:237660002-237670000	Intergenic	NM_020311	57007	NM_020311	ENSG00000144476	ACKR3	atypical chemokine receptor 3	protein-coding
hypo2211	chr12:39760002-39770000	intron (NM_001173463, intron 1 of 33)	NM_001173464	55605	NM_017641	ENSG00000139116	KIF21A	kinesin family member 21A	protein-coding
hypo2212	chr9:30940002-30950000	Intergenic	NR_135134	101929620	NR_135134	ENSG00000260720	LINC01243	long intergenic non-protein coding RNA 1243	ncRNA
hypo2213	chrX:89470002-89480000	Intergenic	NM_138960	90316	NM_138960	ENSG00000153779	TGIF2LX	TGFB induced factor homeobox 2 like, X-linked	protein-coding
hypo2214	chr13:66220002-66230000	Intergenic	NR_132362	105370242	NR_132362		LINC01052	long intergenic non-protein coding RNA 1052	ncRNA
hypo2215	chr2:137870002-137880000	intron (NM_001316349, intron 5 of 27)	NM_001316349	80731	NM_001080427	ENSG00000144229	THSD7B	thrombospondin type 1 domain containing 7B	protein-coding
hypo2216	chr5:2230002-2240000	Intergenic	NR_104616	100506858	NR_104616		LOC100506858	uncharacterized LOC100506858	ncRNA
hypo2217	chr16:18210002-18220000	Intergenic	NM_001282507	101059938	NM_001282507	ENSG00000214967	NPIPA7	nuclear pore complex interacting protein family member A7	protein-coding
hypo2218	chr2:243050002-243060000	intron (NR_130700, intron 2 of 5)	NR_130700	728323	NR_024437		LINC01881	long intergenic non-protein coding RNA 1881	ncRNA
hypo2219	chr2:154880002-154890000	intron (NM_001301627, intron 1 of 11)	NM_001301627	114805	NM_052917	ENSG00000144278	GALNT13	polypeptide N-acetylgalactosaminyltransferase 13	protein-coding
hypo222	chr1:234810002-234820000	Intergenic	NR_125944	101927787	NR_125944	ENSG00000228044	LOC101927787	uncharacterized LOC101927787	ncRNA
hypo2220	chr22:16460002-16470000	Intergenic	NM_001005239	81061	NM_001005239	ENSG00000130538	OR11H1	olfactory receptor family 11 subfamily H member 1	protein-coding
hypo2221	chr6:87540002-87550000	Intergenic	NM_000865	3354	NM_000865	ENSG00000168830	HTR1E	5-hydroxytryptamine receptor 1E	protein-coding
hypo2222	chr2:10580002-10590000	intron (NM_002539, intron 3 of 11)	NR_028374	100302743	NR_028374	ENSG00000206633	SNORA80B	small nucleolar RNA, H/ACA box 80B	snoRNA
hypo2223	chr17:52220002-52230000	Intergenic	NM_032559	84643	NM_032559	ENSG00000141200	KIF2B	kinesin family member 2B	protein-coding
hypo2224	chrX:2950002-2960000	Intergenic	NM_001201538	416	NM_004042	ENSG00000062096	ARSF	arylsulfatase F	protein-coding
hypo2225	chr3:21290002-21300000	Intergenic	NR_002311	391518	NR_002311		VENTXP7	VENT homeobox pseudogene 7	pseudo
hypo2226	chr14:94690002-94700000	TTS (NM_020958)	NM_020958	57718	NM_020958	ENSG00000119698	PPP4R4	protein phosphatase 4 regulatory subunit 4	protein-coding
hypo2227	chr10:96840002-96850000	Intergenic	NM_001198854	1558	NM_000770	ENSG00000138115	CYP2C8	cytochrome P450 family 2 subfamily C member 8	protein-coding
hypo2228	chr7:94040002-94050000	intron (NM_000089, intron 30 of 51)	NM_000089	1278	NM_000089	ENSG00000164692	COL1A2	collagen type I alpha 2 chain	protein-coding
hypo2229	chr9:84530002-84540000	TTS (NR_026851)	NR_026851	347127	NM_198509	ENSG00000240632	SPATA31D5P	SPATA31 subfamily D member 5, pseudogene	pseudo
hypo223	chr13:51740002-51750000	intron (NR_102431, intron 1 of 4)	NR_102432	647166	NR_102431		LINC00371	long intergenic non-protein coding RNA 371	ncRNA
hypo2230	chr10:20380002-20390000	intron (NM_032812, intron 4 of 13)	NM_032812	84898	NM_032812	ENSG00000120594	PLXDC2	plexin domain containing 2	protein-coding
hypo2231	chr7:53190002-53200000	Intergenic	NM_182595	285877	NM_182595	ENSG00000221900	POM121L12	POM121 transmembrane nucleoporin like 12	protein-coding
hypo2232	chr17:44560002-44570000	Intergenic	NM_001006607	474170	NM_001006607	ENSG00000238083	LRRC37A2	leucine rich repeat containing 37 member A2	protein-coding
hypo2233	chrX:73040002-73050000	non-coding (NR_001564, exon 6 of 6)	NR_001564	7503	NR_001564	ENSG00000229807	XIST	X inactive specific transcript (non-protein coding)	ncRNA
hypo2234	chr10:77920002-77930000	intron (NR_131178, intron 6 of 7)	NM_032024	83938	NM_032024	ENSG00000148655	C10orf11	chromosome 10 open reading frame 11	protein-coding
hypo2235	chr1:165080002-165090000	Intergenic	NM_001174069	4009	NM_177398	ENSG00000162761	LMX1A	LIM homeobox transcription factor 1 alpha	protein-coding
hypo2236	chr16:32280002-32290000	Intergenic	NR_033866	390705	NR_033866		LOC390705	protein phosphatase 2 regulatory subunit B'', beta pseudogene	pseudo
hypo2237	chr11:65830002-65840000	intron (NM_006842, intron 19 of 21)	NM_018026	55690	NM_018026	ENSG00000175115	PACS1	phosphofurin acidic cluster sorting protein 1	protein-coding
hypo2238	chrX:36630002-36640000	Intergenic	NR_110412	101928627	NR_110412	ENSG00000226484	LOC101928627	uncharacterized LOC101928627	ncRNA
hypo2239	chr4:45870002-45880000	Intergenic	NM_173536	2565	NM_173536	ENSG00000163285	GABRG1	gamma-aminobutyric acid type A receptor gamma1 subunit	protein-coding
hypo224	chr4:146170002-146180000	Intergenic	NM_001102653	54726	NM_017493	ENSG00000164164	OTUD4	OTU deubiquitinase 4	protein-coding
hypo2240	chr9:16530002-16540000	intron (NM_001317939, intron 4 of 6)	NR_073471	100129385	NM_001271829	ENSG00000205549	C9orf92	chromosome 9 open reading frame 92	protein-coding
hypo2241	chr3:142180002-142190000	intron (NM_001184, intron 40 of 46)	NM_019001	54464	NM_019001	ENSG00000114127	XRN1	5'-3' exoribonuclease 1	protein-coding
hypo2242	chrX:144910002-144920000	Intergenic	NM_004709	9142	NM_004709	ENSG00000221870	TMEM257	transmembrane protein 257	protein-coding
hypo2243	chr4:160890002-160900000	Intergenic	NM_014247	9693	NM_014247	ENSG00000109756	RAPGEF2	Rap guanine nucleotide exchange factor 2	protein-coding
hypo2244	chr5:103680002-103690000	Intergenic	NR_000039	9366	NR_000039	ENSG00000232159	RAB9BP1	RAB9B, member RAS oncogene family pseudogene 1	pseudo
hypo2245	chrX:33660002-33670000	Intergenic	NM_000109	1756	NM_000109	ENSG00000198947	DMD	dystrophin	protein-coding
hypo2246	chrX:53620002-53630000	intron (NM_031407, intron 29 of 83)	NR_029484	406889	NR_029484	ENSG00000208012	MIRLET7F2	microRNA let-7f-2	ncRNA
hypo2247	chr14:42230002-42240000	intron (NM_001346173, intron 1 of 4)	NM_152447	145581	NM_152447	ENSG00000165379	LRFN5	leucine rich repeat and fibronectin type III domain containing 5	protein-coding
hypo2248	chr16:33070002-33080000	Intergenic	NM_001099687	729355	NM_001099687	ENSG00000261509	TP53TG3B	TP53 target 3B	protein-coding
hypo2249	chrX:67290002-67300000	intron (NM_002547, intron 19 of 24)	NM_002547	4983	NM_002547	ENSG00000079482	OPHN1	oligophrenin 1	protein-coding
hypo225	chr1:199760002-199770000	Intergenic	NM_003822	2494	NM_003822	ENSG00000116833	NR5A2	nuclear receptor subfamily 5 group A member 2	protein-coding
hypo2250	chr8:14150002-14160000	intron (NM_001322879, intron 2 of 6)	NR_029875	494332	NR_029875	ENSG00000199127	MIR383	microRNA 383	ncRNA
hypo2251	chr3:41640002-41650000	intron (NR_136342, intron 29 of 34)	NM_017886	54986	NM_017886	ENSG00000168038	ULK4	unc-51 like kinase 4	protein-coding
hypo2252	chr4:138810002-138820000	Intergenic	NR_038380	641364	NR_038380	ENSG00000250033	SLC7A11-AS1	SLC7A11 antisense RNA 1	ncRNA
hypo2253	chrX:34230002-34240000	Intergenic	NM_203408	158724	NM_203408	ENSG00000185448	FAM47A	family with sequence similarity 47 member A	protein-coding
hypo2254	chr12:62180002-62190000	intron (NM_178539, intron 2 of 4)	NM_178539	338811	NM_178539	ENSG00000198673	FAM19A2	family with sequence similarity 19 member A2, C-C motif chemokine like	protein-coding
hypo2255	chrX:144180002-144190000	Intergenic	NM_001009614	494118	NM_001009614	ENSG00000203923	SPANXN1	SPANX family member N1	protein-coding
hypo2256	chrX:84320002-84330000	intron (NM_198450, intron 6 of 8)	NM_001012980	340562	NM_001012980	ENSG00000184788	SATL1	spermidine/spermine N1-acetyl transferase-like 1	protein-coding
hypo2257	chr8:143300002-143310000	intron (NM_145003, intron 13 of 13)	NR_024378	619434	NR_024378	ENSG00000254008	LINC00051	long intergenic non-protein coding RNA 51	ncRNA
hypo2258	chr4:28240002-28250000	Intergenic	NR_036237	100422937	NR_036237	ENSG00000283275	MIR4275	microRNA 4275	ncRNA
hypo2259	chr6:24810002-24820000	intron (NM_001346031, intron 20 of 21)	NM_001282492	101928603	NM_001282492	ENSG00000260286	C6orf229	chromosome 6 open reading frame 229	protein-coding
hypo226	chr5:139890002-139900000	intron (NM_020690, intron 24 of 35)	NM_003732	8637	NM_003732	ENSG00000243056	EIF4EBP3	eukaryotic translation initiation factor 4E binding protein 3	protein-coding
hypo2260	chr1:73430002-73440000	Intergenic	NR_110676	101927295	NR_110676	ENSG00000233973	LINC01360	long intergenic non-protein coding RNA 1360	ncRNA
hypo2261	chr12:92110002-92120000	Intergenic	NR_046159	256021	NM_001256373	ENSG00000257242	LINC01619	long intergenic non-protein coding RNA 1619	ncRNA
hypo2262	chr5:124670002-124680000	intron (NR_109882, intron 5 of 5)	NR_109887	101927460	NR_109887	ENSG00000260192	LOC101927460	uncharacterized LOC101927460	ncRNA
hypo2263	chr7:52000002-52010000	Intergenic	NM_001287436	23242	NM_015198	ENSG00000106078	COBL	cordon-bleu WH2 repeat protein	protein-coding
hypo2264	chr13:53340002-53350000	Intergenic	NM_007015	11061	NM_007015	ENSG00000136110	CNMD	chondromodulin	protein-coding
hypo2265	chr10:1650002-1660000	intron (NM_018702, intron 1 of 9)	NR_033387	642394	NM_001098830	ENSG00000205696	ADARB2-AS1	ADARB2 antisense RNA 1	ncRNA
hypo2266	chr14:28080002-28090000	intron (NR_039992, intron 2 of 4)	NR_039992	100505967	NR_039992	ENSG00000258548	LINC00645	long intergenic non-protein coding RNA 645	ncRNA
hypo2267	chrX:112710002-112720000	intron (NR_110399, intron 3 of 3)	NR_110399	101928437	NR_110399		LOC101928437	uncharacterized LOC101928437	ncRNA
hypo2268	chr3:146110002-146120000	Intergenic	NM_001199978	57047	NM_020359	ENSG00000163746	PLSCR2	phospholipid scramblase 2	protein-coding
hypo2269	chr6:16370002-16380000	intron (NM_001128164, intron 6 of 7)	NM_006877	2766	NM_006877	ENSG00000137198	GMPR	guanosine monophosphate reductase	protein-coding
hypo227	chr19:49650002-49660000	TTS (NR_103842)	NM_002152	3270	NM_002152	ENSG00000130528	HRC	histidine rich calcium binding protein	protein-coding
hypo2270	chrX:70340002-70350000	intron (NM_005120, intron 15 of 44)	NM_005120	9968	NM_005120	ENSG00000184634	MED12	mediator complex subunit 12	protein-coding
hypo2271	chrX:148400002-148410000	Intergenic	NM_001166550	3423	NM_000202	ENSG00000010404	IDS	iduronate 2-sulfatase	protein-coding
hypo2272	chr4:11760002-11770000	Intergenic	NM_005114	9957	NM_005114	ENSG00000002587	HS3ST1	heparan sulfate-glucosamine 3-sulfotransferase 1	protein-coding
hypo2273	chr22:49380002-49390000	Intergenic	NR_038944	100128946	NR_038944	ENSG00000205632	LINC01310	long intergenic non-protein coding RNA 1310	ncRNA
hypo2274	chr1:59700002-59710000	Intergenic	NM_018291	55277	NM_018291	ENSG00000172456	FGGY	FGGY carbohydrate kinase domain containing	protein-coding
hypo2275	chr8:7760002-7770000	Intergenic	NM_004942	1673	NM_004942	ENSG00000171711	DEFB4A	defensin beta 4A	protein-coding
hypo2276	chr4:182770002-182780000	Intergenic	NR_125905	90768	NR_027107		LOC90768	uncharacterized LOC90768	ncRNA
hypo2277	chr6:94900002-94910000	Intergenic	NR_015362	643432	NR_015362		TSG1	tumor suppressor TSG1	ncRNA
hypo2278	chr16:33760002-33770000	Intergenic	NR_130771	104644205	NR_130771		ENPP7P13	ectonucleotide pyrophosphatase/phosphodiesterase 7 pseudogene 13	pseudo
hypo2279	chr5:150350002-150360000	Intergenic	NR_026867	134466	NR_026867		ZNF300P1	zinc finger protein 300 pseudogene 1	pseudo
hypo228	chr1:67620002-67630000	Intergenic	NM_144701	149233	NM_144701	ENSG00000162594	IL23R	interleukin 23 receptor	protein-coding
hypo2280	chr7:38610002-38620000	intron (NM_139316, intron 1 of 19)	NM_001635	273	NM_001635	ENSG00000078053	AMPH	amphiphysin	protein-coding
hypo2281	chrX:50830002-50840000	Intergenic	NR_110382	101926971	NR_110382	ENSG00000230317	LINC01284	long intergenic non-protein coding RNA 1284	ncRNA
hypo2282	chr6:155120002-155130000	intron (NM_001286199, intron 9 of 20)	NR_036100	100422821	NR_036100	ENSG00000264814	MIR1273C	microRNA 1273c	ncRNA
hypo2283	chr9:71020002-71030000	intron (NM_021965, intron 6 of 10)	NR_015423	572558	NR_015423	ENSG00000224958	PGM5-AS1	PGM5 antisense RNA 1	ncRNA
hypo2284	chr9:26310002-26320000	Intergenic	NM_001004352	100506422	NM_001004352		LOC100506422	putative deoxyuridine 5'-triphosphate nucleotidohydrolase-like protein FLJ16323	protein-coding
hypo2285	chr10:28040002-28050000	intron (NR_121652, intron 1 of 1)	NM_173576	283078	NM_173576	ENSG00000150051	MKX	mohawk homeobox	protein-coding
hypo2286	chrX:21550002-21560000	intron (NM_001330772, intron 10 of 19)	NM_153270	257240	NM_153270	ENSG00000185915	KLHL34	kelch like family member 34	protein-coding
hypo2287	chr1:96660002-96670000	Intergenic	NR_110693	101928241	NR_110693	ENSG00000231987	LINC01787	long intergenic non-protein coding RNA 1787	ncRNA
hypo2288	chrX:22810002-22820000	intron (NR_073010, intron 3 of 11)	NM_182699	168400	NM_182699	ENSG00000184735	DDX53	DEAD-box helicase 53	protein-coding
hypo2289	chrX:143880002-143890000	Intergenic	NM_001009614	494118	NM_001009614	ENSG00000203923	SPANXN1	SPANX family member N1	protein-coding
hypo229	chr7:20770002-20780000	intron (NM_178559, intron 14 of 18)	NM_182700	221833	NM_182700	ENSG00000164651	SP8	Sp8 transcription factor	protein-coding
hypo2290	chrX:65800002-65810000	Intergenic	NM_001242310	60401	NM_021783	ENSG00000131080	EDA2R	ectodysplasin A2 receptor	protein-coding
hypo2291	chrX:146510002-146520000	Intergenic	NR_030239	574517	NR_030239	ENSG00000207866	MIR514A2	microRNA 514a-2	ncRNA
hypo2292	chr8:115380002-115390000	Intergenic	NM_052900	114788	NM_052900	ENSG00000164796	CSMD3	CUB and Sushi multiple domains 3	protein-coding
hypo2293	chr8:17910002-17920000	3' UTR (NM_177924, exon 14 of 14)	NM_177924	427	NM_004315	ENSG00000104763	ASAH1	N-acylsphingosine amidohydrolase 1	protein-coding
hypo2294	chr7:38390002-38400000	intron (NR_040085, intron 3 of 3)	NR_040085	100506776	NR_040085	ENSG00000281103	TRG-AS1	T cell receptor gamma locus antisense RNA 1	ncRNA
hypo2295	chr13:77820002-77830000	intron (NM_015057, intron 15 of 82)	NM_015057	23077	NM_015057	ENSG00000005810	MYCBP2	MYC binding protein 2, E3 ubiquitin protein ligase	protein-coding
hypo2296	chrX:38840002-38850000	Intergenic	NR_046706	100874211	NR_046706		MID1IP1-AS1	MID1IP1 antisense RNA 1	ncRNA
hypo2297	chr3:33890002-33900000	intron (NM_001162429, intron 13 of 17)	NM_001162429	10015	NM_013374	ENSG00000170248	PDCD6IP	programmed cell death 6 interacting protein	protein-coding
hypo2298	chr21:10510002-10520000	Intergenic	NM_001290224	7179	NM_199259	ENSG00000274391	TPTE	transmembrane phosphatase with tensin homology	protein-coding
hypo2299	chr2:16590002-16600000	Intergenic	NM_030797	81553	NM_030797	ENSG00000197872	FAM49A	family with sequence similarity 49 member A	protein-coding
hypo23	chr8:8660002-8670000	intron (NM_004225, intron 1 of 2)	NM_004225	9258	NM_004225	ENSG00000147324	MFHAS1	malignant fibrous histiocytoma amplified sequence 1	protein-coding
hypo230	chr4:171590002-171600000	Intergenic	NR_134683	100506107	NR_134683	ENSG00000250968	LOC100506107	uncharacterized LOC100506107	ncRNA
hypo2300	chr7:68690002-68700000	Intergenic	NR_108105	100507468	NR_108105		LOC100507468	uncharacterized LOC100507468	ncRNA
hypo2301	chr9:130002-140000	exon (NM_001145355, exon 12 of 16)	NM_207305	2298	NM_207305	ENSG00000170122	FOXD4	forkhead box D4	protein-coding
hypo2302	chr16:29560002-29570000	intron (NR_135317, intron 7 of 11)	NR_135305	440354	NR_002473		SMG1P2	SMG1P2, nonsense mediated mRNA decay associated PI3K related kinase pseudogene 2	pseudo
hypo2303	chr11:101590002-101600000	Intergenic	NM_004621	7225	NM_004621	ENSG00000137672	TRPC6	transient receptor potential cation channel subfamily C member 6	protein-coding
hypo2304	chrX:34040002-34050000	Intergenic	NM_203408	158724	NM_203408	ENSG00000185448	FAM47A	family with sequence similarity 47 member A	protein-coding
hypo2305	chrX:30110002-30120000	Intergenic	NM_002364	4113	NM_002364	ENSG00000099399	MAGEB2	MAGE family member B2	protein-coding
hypo2306	chr14:57130002-57140000	Intergenic	NM_017799	54916	NM_017799	ENSG00000070269	TMEM260	transmembrane protein 260	protein-coding
hypo2307	chrX:50050002-50060000	intron (NM_033031, intron 5 of 11)	NM_033031	85417	NM_033031	ENSG00000147082	CCNB3	cyclin B3	protein-coding
hypo2308	chrX:4060002-4070000	Intergenic	NR_034031	389906	NM_001045547		LOC389906	zinc finger protein 839 pseudogene	pseudo
hypo2309	chr9:97100002-97110000	intron (NR_033937, intron 2 of 2)	NR_033937	100132077	NR_033937	ENSG00000232063	LOC100132077	uncharacterized LOC100132077	ncRNA
hypo231	chr2:21240002-21250000	intron (NM_000384, intron 18 of 28)	NM_000384	338	NM_000384	ENSG00000084674	APOB	apolipoprotein B	protein-coding
hypo2310	chr4:63770002-63780000	Intergenic	NR_110595	101927186	NR_110595		ADGRL3-AS1	adhesion G protein-coupled receptor L3 antisense RNA 1	ncRNA
hypo2311	chrX:84400002-84410000	Intergenic	NM_001012980	340562	NM_001012980	ENSG00000184788	SATL1	spermidine/spermine N1-acetyl transferase-like 1	protein-coding
hypo2312	chr8:113570002-113580000	intron (NM_052900, intron 23 of 68)	NR_031745	100302225	NR_031745	ENSG00000238399	MIR2053	microRNA 2053	ncRNA
hypo2313	chrX:64130002-64140000	TTS (NM_001178033)	NR_045044	55906	NM_018684	ENSG00000126970	ZC4H2	zinc finger C4H2-type containing	protein-coding
hypo2314	chr15:97920002-97930000	intron (NR_120324, intron 4 of 4)	NR_120324	101927286	NR_120324	ENSG00000259664	LOC101927286	uncharacterized LOC101927286	ncRNA
hypo2315	chrX:68960002-68970000	intron (NM_001005613, intron 2 of 2)	NM_001005609	1896	NM_001399	ENSG00000158813	EDA	ectodysplasin A	protein-coding
hypo2316	chrX:6120002-6130000	intron (NM_001282145, intron 1 of 6)	NR_136577	105373156	NR_136577		LOC105373156	uncharacterized LOC105373156	ncRNA
hypo2317	chrX:103910002-103920000	intron (NM_017416, intron 2 of 10)	NM_017416	26280	NM_017416	ENSG00000189108	IL1RAPL2	interleukin 1 receptor accessory protein like 2	protein-coding
hypo2318	chrX:6650002-6660000	Intergenic	NM_016379	51481	NM_016379	ENSG00000169059	VCX3A	variable charge, X-linked 3A	protein-coding
hypo2319	chr14:20170002-20180000	Intergenic	NM_001197287	79334	NM_001197287	ENSG00000258453	OR11H2	olfactory receptor family 11 subfamily H member 2	protein-coding
hypo232	chr7:91730002-91740000	exon (NM_147185, exon 47 of 50)	NM_000786	1595	NM_000786	ENSG00000001630	CYP51A1	cytochrome P450 family 51 subfamily A member 1	protein-coding
hypo2320	chrX:64590002-64600000	Intergenic	NM_001010888	340554	NM_001010888	ENSG00000102053	ZC3H12B	zinc finger CCCH-type containing 12B	protein-coding
hypo2321	chr1:152320002-152330000	exon (NM_001014342, exon 3 of 3)	NM_001014342	388698	NM_001014342	ENSG00000143520	FLG2	filaggrin family member 2	protein-coding
hypo2322	chr6:65100002-65110000	intron (NM_001292009, intron 28 of 43)	NM_015153	23469	NM_015153	ENSG00000118482	PHF3	PHD finger protein 3	protein-coding
hypo2323	chr13:84400002-84410000	Intergenic	NM_052910	114798	NM_052910	ENSG00000178235	SLITRK1	SLIT and NTRK like family member 1	protein-coding
hypo2324	chr8:84920002-84930000	Intergenic	NM_001100393	138046	NM_173848	ENSG00000184672	RALYL	RALY RNA binding protein-like	protein-coding
hypo2325	chr11:25220002-25230000	Intergenic	NM_001252010	338645	NM_001009909	ENSG00000187398	LUZP2	leucine zipper protein 2	protein-coding
hypo2326	chr4:171790002-171800000	Intergenic	NR_134683	100506107	NR_134683	ENSG00000250968	LOC100506107	uncharacterized LOC100506107	ncRNA
hypo2327	chr2:89350002-89360000	Intergenic	NR_039635	100616399	NR_039635	ENSG00000265510	MIR4436A	microRNA 4436a	ncRNA
hypo2328	chr5:28920002-28930000	Intergenic	NR_033961	729862	NR_033961		LSP1P3	lymphocyte-specific protein 1 pseudogene 3	pseudo
hypo2329	chr12:98400002-98410000	Intergenic	NR_036189	100422924	NR_036189	ENSG00000263890	MIR4303	microRNA 4303	ncRNA
hypo233	chr14:63750002-63760000	intron (NM_020663, intron 4 of 4)	NM_145171	122876	NM_145171	ENSG00000179600	GPHB5	glycoprotein hormone beta 5	protein-coding
hypo2330	chr3:195710002-195720000	intron (NR_003264, intron 1 of 16)	NR_003264	255812	NR_003264	ENSG00000185485	SDHAP1	succinate dehydrogenase complex flavoprotein subunit A pseudogene 1	pseudo
hypo2331	chr12:31300002-31310000	Intergenic	NR_038927	100506660	NR_038927	ENSG00000245614	DDX11-AS1	DDX11 antisense RNA 1	ncRNA
hypo2332	chrX:135760002-135770000	exon (NM_004840, exon 13 of 22)	NM_000074	959	NM_000074	ENSG00000102245	CD40LG	CD40 ligand	protein-coding
hypo2333	chr1:97380002-97390000	Intergenic	NR_046590	100873932	NR_046590	ENSG00000232878	DPYD-AS1	DPYD antisense RNA 1	ncRNA
hypo2334	chr3:142050002-142060000	intron (NM_019001, intron 33 of 41)	NR_033289	256356	NM_152776	ENSG00000175066	GK5	glycerol kinase 5 (putative)	protein-coding
hypo2335	chr14:47830002-47840000	intron (NM_001113498, intron 1 of 16)	NM_182830	161357	NM_182830	ENSG00000139915	MDGA2	MAM domain containing glycosylphosphatidylinositol anchor 2	protein-coding
hypo2336	chr5:18940002-18950000	Intergenic	NM_001291957	1016	NM_004934	ENSG00000145526	CDH18	cadherin 18	protein-coding
hypo2337	chr3:10410002-10420000	intron (NM_001330611, intron 8 of 21)	NR_030614	100126334	NR_030614	ENSG00000216135	MIR885	microRNA 885	ncRNA
hypo2338	chr16:28360002-28370000	intron (NM_001282524, intron 1 of 6)	NM_001282524	728741	NM_001282524	ENSG00000198156	NPIPB6	nuclear pore complex interacting protein family member B6	protein-coding
hypo2339	chrX:56620002-56630000	Intergenic	NM_013444	29978	NM_013444	ENSG00000188021	UBQLN2	ubiquilin 2	protein-coding
hypo234	chr5:154180002-154190000	intron (NM_015315, intron 14 of 18)	NR_039667	100616306	NR_039667	ENSG00000263361	MIR378H	microRNA 378h	ncRNA
hypo2340	chr5:3360002-3370000	Intergenic	NR_104618	102467075	NR_104618	ENSG00000250716	LINC01017	long intergenic non-protein coding RNA 1017	ncRNA
hypo2341	chrX:3170002-3180000	Intergenic	NR_038428	100129464	NR_038428	ENSG00000228459	LINC01546	long intergenic non-protein coding RNA 1546	ncRNA
hypo2342	chr2:164290002-164300000	Intergenic	NM_001321825	55137	NM_018086	ENSG00000182263	FIGN	fidgetin, microtubule severing factor	protein-coding
hypo2343	chrX:68970002-68980000	intron (NM_001005613, intron 2 of 2)	NM_001005609	1896	NM_001399	ENSG00000158813	EDA	ectodysplasin A	protein-coding
hypo2344	chr8:108320002-108330000	intron (NM_001199859, intron 4 of 8)	NM_001314051	284	NM_001146	ENSG00000154188	ANGPT1	angiopoietin 1	protein-coding
hypo2345	chr16:59320002-59330000	Intergenic	NR_028471	644649	NR_028471		APOOP5	apolipoprotein O pseudogene 5	pseudo
hypo2346	chr10:42610002-42620000	Intergenic	NR_024380	441666	NR_024380	ENSG00000215146	LOC441666	zinc finger protein 91 pseudogene	pseudo
hypo2347	chrX:57490002-57500000	intron (NM_174912, intron 10 of 10)	NM_007157	158586	NM_007157	ENSG00000198455	ZXDB	zinc finger, X-linked, duplicated B	protein-coding
hypo2348	chr16:33330002-33340000	Intergenic	NR_033866	390705	NR_033866		LOC390705	protein phosphatase 2 regulatory subunit B'', beta pseudogene	pseudo
hypo2349	chr17:18340002-18350000	intron (NR_073414, intron 4 of 6)	NR_073414	729252	NR_073414		KRT16P1	keratin 16 pseudogene 1	pseudo
hypo235	chr8:10530002-10540000	intron (NM_001040032, intron 2 of 3)	NM_001040032	203076	NM_001040032	ENSG00000171060	C8orf74	chromosome 8 open reading frame 74	protein-coding
hypo2350	chr7:126460002-126470000	intron (NM_001127323, intron 6 of 10)	NR_030323	693177	NR_030323	ENSG00000207692	MIR592	microRNA 592	ncRNA
hypo2351	chr3:76860002-76870000	Intergenic	NM_001290065	6092	NM_002942	ENSG00000185008	ROBO2	roundabout guidance receptor 2	protein-coding
hypo2352	chr3:87540002-87550000	Intergenic	NM_000306	5449	NM_000306	ENSG00000064835	POU1F1	POU class 1 homeobox 1	protein-coding
hypo2353	chr15:87350002-87360000	intron (NM_152336, intron 23 of 24)	NR_135682	105370954	NR_135682	ENSG00000259636	LOC105370954	uncharacterized LOC105370954	ncRNA
hypo2354	chr2:143630002-143640000	promoter-TSS (NM_001032998)	NM_001032998	8942	NM_003937	ENSG00000115919	KYNU	kynureninase	protein-coding
hypo2355	chr6:118020002-118030000	intron (NM_138459, intron 4 of 4)	NM_138459	116150	NM_138459	ENSG00000153989	NUS1	NUS1 dehydrodolichyl diphosphate synthase subunit	protein-coding
hypo2356	chrX:4670002-4680000	Intergenic	NR_110390	101928201	NR_110390	ENSG00000236513	LOC101928201	uncharacterized LOC101928201	ncRNA
hypo2357	chr4:168450002-168460000	Intergenic	NM_001251967	50859	NM_016950	ENSG00000196104	SPOCK3	SPARC/osteonectin, cwcv and kazal like domains proteoglycan 3	protein-coding
hypo2358	chrX:27360002-27370000	Intergenic	NR_002784	139420	NR_002784	ENSG00000224960	PPP4R3CP	protein phosphatase 4 regulatory subunit 3C, pseudogene	pseudo
hypo2359	chr10:17760002-17770000	Intergenic	NM_001098844	653567	NM_001013629	ENSG00000148483	TMEM236	transmembrane protein 236	protein-coding
hypo236	chr10:520002-530000	intron (NM_014974, intron 2 of 36)	NR_049884	100847086	NR_049884	ENSG00000263511	MIR5699	microRNA 5699	ncRNA
hypo2360	chr17:6090002-6100000	Intergenic	NM_015253	23302	NM_015253	ENSG00000179314	WSCD1	WSC domain containing 1	protein-coding
hypo2361	chr9:76040002-76050000	Intergenic	NM_000700	301	NM_000700	ENSG00000135046	ANXA1	annexin A1	protein-coding
hypo2362	chr22:18770002-18780000	intron (NR_003267, intron 4 of 12)	NR_003267	2679	NR_003267	ENSG00000197421	GGT3P	gamma-glutamyltransferase 3 pseudogene	pseudo
hypo2363	chr8:12260002-12270000	intron (NR_026789, intron 4 of 4)	NR_024044	245912	NR_024044		DEFB109P1	defensin beta 109 pseudogene 1	pseudo
hypo2364	chr3:162260002-162270000	Intergenic	NR_033945	647107	NR_033945	ENSG00000241369	LINC01192	long intergenic non-protein coding RNA 1192	ncRNA
hypo2365	chrX:81090002-81100000	Intergenic	NM_030763	79366	NM_030763	ENSG00000198157	HMGN5	high mobility group nucleosome binding domain 5	protein-coding
hypo2366	chr9:39030002-39040000	Intergenic	NM_033655	79937	NM_033655	ENSG00000106714	CNTNAP3	contactin associated protein-like 3	protein-coding
hypo2367	chr1:243230002-243240000	intron (NR_029401, intron 10 of 17)	NR_029401	731275	NR_029401	ENSG00000214837	LINC01347	long intergenic non-protein coding RNA 1347	ncRNA
hypo2368	chrX:46200002-46210000	Intergenic	NR_110388	101927574	NR_110388	ENSG00000236751	LINC01186	long intergenic non-protein coding RNA 1186	ncRNA
hypo2369	chr10:42720002-42730000	Intergenic	NR_024380	441666	NR_024380	ENSG00000215146	LOC441666	zinc finger protein 91 pseudogene	pseudo
hypo237	chr15:74050002-74060000	Intergenic	NR_120353	101929221	NR_120352		C15orf59-AS1	C15orf59 antisense RNA 1	ncRNA
hypo2370	chr14:41650002-41660000	Intergenic	NR_109758	644919	NR_109757		LOC644919	uncharacterized LOC644919	ncRNA
hypo2371	chr6:32000002-32010000	Intergenic	NM_001128590	1589	NM_000500	ENSG00000231852	CYP21A2	cytochrome P450 family 21 subfamily A member 2	protein-coding
hypo2372	chr19:51320002-51330000	exon (NM_002257, exon 2 of 5)	NM_002257	3816	NM_002257	ENSG00000167748	KLK1	kallikrein 1	protein-coding
hypo2373	chr1:199530002-199540000	Intergenic	NM_003822	2494	NM_003822	ENSG00000116833	NR5A2	nuclear receptor subfamily 5 group A member 2	protein-coding
hypo2374	chr14:63420002-63430000	intron (NM_172375, intron 6 of 9)	NM_139318	27133	NM_139318	ENSG00000140015	KCNH5	potassium voltage-gated channel subfamily H member 5	protein-coding
hypo2375	chrX:131420002-131430000	intron (NR_110410, intron 2 of 2)	NM_001271186	57826	NM_021183	ENSG00000123728	RAP2C	RAP2C, member of RAS oncogene family	protein-coding
hypo2376	chr6:66020002-66030000	intron (NM_001292009, intron 11 of 43)	NM_001271675	441155	NM_001271675		LOC441155	zinc finger CCCH-type domain-containing-like	protein-coding
hypo2377	chrX:51930002-51940000	intron (NM_001098800, intron 12 of 12).2	NR_003711	100124541	NR_003711	ENSG00000221475	SNORA11D	small nucleolar RNA, H/ACA box 11D	snoRNA
hypo2378	chrX:89370002-89380000	Intergenic	NM_138960	90316	NM_138960	ENSG00000153779	TGIF2LX	TGFB induced factor homeobox 2 like, X-linked	protein-coding
hypo2379	chr9:43480002-43490000	Intergenic	NR_126166	100996582	NR_126166		FAM74A7	family with sequence similarity 74 member A7	ncRNA
hypo238	chr10:84810002-84820000	Intergenic	NR_134317	105378397	NR_134317		LOC105378397	uncharacterized LOC105378397	ncRNA
hypo2380	chr3:6140002-6150000	Intergenic	NR_110123	101927347	NR_110123	ENSG00000226258	GRM7-AS3	GRM7 antisense RNA 3	ncRNA
hypo2381	chr9:43860002-43870000	intron (NM_001201380, intron 13 of 23)	NR_111893	643827	NM_001012280		CNTNAP3P2	contactin associated protein-like 3 pseudogene 2	pseudo
hypo2382	chr8:118380002-118390000	Intergenic	NM_001282986	90390	NM_080651	ENSG00000164758	MED30	mediator complex subunit 30	protein-coding
hypo2383	chr5:98760002-98770000	Intergenic	NR_110562	102724855	NR_110562		LINC02113	long intergenic non-protein coding RNA 2113	ncRNA
hypo2384	chrX:10920002-10930000	Intergenic	NM_033290	4281	NM_000381	ENSG00000101871	MID1	midline 1	protein-coding
hypo2385	chrX:4180002-4190000	Intergenic	NR_110390	101928201	NR_110390	ENSG00000236513	LOC101928201	uncharacterized LOC101928201	ncRNA
hypo2386	chr2:157320002-157330000	intron (NM_000408, intron 1 of 16)	NM_000408	2820	NM_000408	ENSG00000115159	GPD2	glycerol-3-phosphate dehydrogenase 2	protein-coding
hypo2387	chrX:79180002-79190000	Intergenic	NM_001109879	50945	NM_016954	ENSG00000122145	TBX22	T-box 22	protein-coding
hypo2388	chr1:145350002-145360000	intron (NM_001039703, intron 62 of 85)	NR_125967	101928979	NR_125967	ENSG00000233396	LINC01719	long intergenic non-protein coding RNA 1719	ncRNA
hypo2389	chr11:124110002-124120000	Intergenic	NR_045681	26494	NM_001002905	ENSG00000197849	OR8G1	olfactory receptor family 8 subfamily G member 1 (gene/pseudogene)	protein-coding
hypo239	chr22:48230002-48240000	intron (NR_122046, intron 8 of 8)	NR_122046	284930	NR_122046	ENSG00000224271	LOC284930	uncharacterized LOC284930	ncRNA
hypo2390	chr4:35440002-35450000	Intergenic	NR_122079	439933	NR_122079	ENSG00000247193	LOC439933	uncharacterized LOC439933	ncRNA
hypo2391	chr4:130590002-130600000	Intergenic	NR_110753	101927282	NR_110753	ENSG00000246876	LOC101927282	uncharacterized LOC101927282	ncRNA
hypo2392	chrX:81930002-81940000	Intergenic	NM_000307	5456	NM_000307	ENSG00000196767	POU3F4	POU class 3 homeobox 4	protein-coding
hypo2393	chr9:40500002-40510000	Intergenic	NR_135122	105379450	NR_135122		LOC105379450	uncharacterized LOC105379450	ncRNA
hypo2394	chr2:96310002-96320000	Intergenic	NM_138800	129868	NM_138800	ENSG00000144015	TRIM43	tripartite motif containing 43	protein-coding
hypo2395	chr12:131800002-131810000	Intergenic	NR_135045	107161159	NR_135045	ENSG00000248703	LOC107161159	uncharacterized LOC107161159	ncRNA
hypo2396	chr2:90000002-90010000	Intergenic	NR_039635	100616399	NR_039635	ENSG00000265510	MIR4436A	microRNA 4436a	ncRNA
[truncated: 1,015 more rows]
