# Supplementary material for: Genome-Wide Plasma Cell-Free DNA Methylation Profiling Identifies Potential Biomarkers for Lung Cancer
Source: Dis Markers. 2019 Feb 5;2019:4108474. doi: 10.1155/2019/4108474 (PMC6379867; doi:10.1155/2019/4108474)
Supplement: Supplementary Materials — Figure S1: representative bioanalyzer profiles of cfDNA and MeDIP-seq libraries. Figure S2: MeDIP-seq analysis in lung cancer patients and controls. Table S1: real-time quantitative PCR primer sequences for validating MeDIP-seq enrichment efficiency. Table S2: DMRs identified in cfDNA of lung cancer patient plasma. Table S3: DMRs at promoter regions in cfDNA of lung cancer patient plasma. Table S4: GO annotation terms for the promoter-hypermethylated genes. [file 4108474.f1.zip › Supplementary Table S3 DMRs at promoter regions in cfDNA of lung cancer patient plasma..xlsx]

## Sheet: Promoter region DMRs
Supplementary Table S3： DMRs at promoter regions in cfDNA of lung cancer patient plasma.
Name	Coordinate	Annotation	Nearest PromoterID	Entrez ID	Nearest Refseq	Nearest Ensembl	Gene Name	Gene Description	Gene Type
hyper1	chr17:79100625-79101174	intron (NM_001080395, intron 6 of 13)	NR_029897	442906	NR_029897	ENSG00000283604	MIR338	microRNA 338	ncRNA
hyper10	chr20:22560732-22561281	TTS (NM_021784)	NR_001558	140828	NR_001558	ENSG00000259974	LINC00261	long intergenic non-protein coding RNA 261	ncRNA
hyper11	chr22:25026883-25027432	Intergenic	NR_024494	644165	NR_024494		BCRP3	breakpoint cluster region pseudogene 3	pseudo
hyper12	chr14:88494108-88494657	intron (NR_046094, intron 2 of 3)	NR_110121	101928791	NR_110121	ENSG00000258826	LOC101928791	uncharacterized LOC101928791	ncRNA
hyper13	chr11:6864915-6865464	Intergenic	NM_178168	144124	NM_178168	ENSG00000166363	OR10A5	olfactory receptor family 10 subfamily A member 5	protein-coding
hyper14	chr17:9863668-9864217	intron (NM_001130831, intron 4 of 13)	NM_003644	8522	NM_003644	ENSG00000007237	GAS7	growth arrest specific 7	protein-coding
hyper15	chr1:154292693-154293242	promoter-TSS (NM_080429)	NM_080429	89872	NM_080429	ENSG00000143595	AQP10	aquaporin 10	protein-coding
hyper16	chr11:8291634-8292183	Intergenic	NM_001270428	4004	NM_002315	ENSG00000166407	LMO1	LIM domain only 1	protein-coding
hyper17	chr5:140104295-140104844	Intergenic	NR_026705	56662	NR_026705	ENSG00000202515	VTRNA1-3	vault RNA 1-3	ncRNA
hyper18	chr17:46234225-46234774	promoter-TSS (NR_031607)	NR_031607	100302211	NR_031607	ENSG00000221739	MIR1203	microRNA 1203	ncRNA
hyper19	chr9:126772440-126772989	Intergenic	NR_135129	100505588	NR_135129	ENSG00000236668	LOC100505588	uncharacterized LOC100505588	ncRNA
hyper2	chr19:55693172-55693721	exon (NM_002842, exon 19 of 20)	NM_003180	6861	NM_003180	ENSG00000129990	SYT5	synaptotagmin 5	protein-coding
hyper20	chr2:26623335-26623884	Intergenic	NM_145038	92749	NM_145038	ENSG00000157856	DRC1	dynein regulatory complex subunit 1	protein-coding
hyper21	chr8:131029799-131030348	Intergenic	NR_046361	51571	NM_016623	ENSG00000153310	FAM49B	family with sequence similarity 49 member B	protein-coding
hyper22	chr6:31139372-31139921	Intergenic	NM_002701	5460	NM_002701	ENSG00000204531	POU5F1	POU class 5 homeobox 1	protein-coding
hyper23	chr16:2082916-2083465	promoter-TSS (NM_001252073)	NM_001252075	9351	NM_004785	ENSG00000065054	SLC9A3R2	SLC9A3 regulator 2	protein-coding
hyper24	chr2:134022318-134022867	intron (NM_207481, intron 4 of 17)	NR_110294	101928161	NR_110294	ENSG00000226953	LOC101928161	uncharacterized LOC101928161	ncRNA
hyper25	chr11:18286909-18287458	promoter-TSS (NM_000331)	NM_000331	6288	NM_000331	ENSG00000173432	SAA1	serum amyloid A1	protein-coding
hyper26	chr2:176970085-176970634	Intergenic	NM_021192	3237	NM_021192	ENSG00000128713	HOXD11	homeobox D11	protein-coding
hyper27	chr17:53341422-53341971	promoter-TSS (NM_002126)	NM_002126	3131	NM_002126	ENSG00000108924	HLF	HLF, PAR bZIP transcription factor	protein-coding
hyper28	chr5:38846283-38846832	promoter-TSS (NR_109951)	NM_003999	9180	NM_003999	ENSG00000145623	OSMR	oncostatin M receptor	protein-coding
hyper29	chr4:57523040-57523589	promoter-TSS (NM_001145459)	NM_001145459	84525	NM_032495	ENSG00000171476	HOPX	HOP homeobox	protein-coding
hyper3	chr14:71003184-71003733	Intergenic	NM_003814	8748	NM_003814	ENSG00000134007	ADAM20	ADAM metallopeptidase domain 20	protein-coding
hyper30	chr20:35167888-35168437	intron (NR_109939, intron 2 of 4)	NM_181526	10398	NM_006097	ENSG00000101335	MYL9	myosin light chain 9	protein-coding
hyper31	chrX:102509923-102510472	promoter-TSS (NM_001006684)	NM_153333	90843	NM_153333	ENSG00000180964	TCEAL8	transcription elongation factor A like 8	protein-coding
hyper32	chr16:449859-450408	exon (NM_001286435, exon 5 of 5)	NM_020664	26063	NM_020664	ENSG00000242612	DECR2	2,4-dienoyl-CoA reductase 2	protein-coding
hyper33	chr21:37756240-37756789	Intergenic	NM_005441	8208	NM_005441	ENSG00000159259	CHAF1B	chromatin assembly factor 1 subunit B	protein-coding
hyper4	chr17:79100651-79101200	intron (NM_001080395, intron 6 of 13)	NR_029897	442906	NR_029897	ENSG00000283604	MIR338	microRNA 338	ncRNA
hyper5	chr6:71667140-71667689	promoter-TSS (NM_080742)	NM_080742	135152	NM_080742	ENSG00000112309	B3GAT2	beta-1,3-glucuronyltransferase 2	protein-coding
hyper6	chr10:49893169-49893718	promoter-TSS (NM_020945)	NM_020945	57705	NM_020945	ENSG00000283652	WDFY4	WDFY family member 4	protein-coding
hyper7	chr19:14993069-14993618	Intergenic	NM_030901	26333	NM_030901	ENSG00000185385	OR7A17	olfactory receptor family 7 subfamily A member 17	protein-coding
hyper8	chr4:40335897-40336446	Intergenic	NM_017581	55584	NM_017581	ENSG00000174343	CHRNA9	cholinergic receptor nicotinic alpha 9 subunit	protein-coding
hyper9	chr16:75302853-75303402	Intergenic	NM_001170715	9564	NM_014567	ENSG00000050820	BCAR1	BCAR1, Cas family scaffolding protein	protein-coding
hypo1	chr7:100610905-100611454	intron (NM_005960, intron 14 of 14)	NM_001164462	10071	NM_001164462	ENSG00000205277	MUC12	mucin 12, cell surface associated	protein-coding
hypo10	chr11:102826265-102826814	promoter-TSS (NM_002427)	NM_002427	4322	NM_002427	ENSG00000137745	MMP13	matrix metallopeptidase 13	protein-coding
hypo100	chr4:9245256-9245805	promoter-TSS (NM_001256857)	NM_001256857	100287327	NM_001256857	ENSG00000249104	USP17L17	ubiquitin specific peptidase 17-like family member 17	protein-coding
hypo101	chr12:120808435-120808984	Intergenic	NM_002442	4440	NM_002442	ENSG00000135097	MSI1	musashi RNA binding protein 1	protein-coding
hypo102	chr2:107085703-107086252	Intergenic	NM_001144013	653489	NM_001144013	ENSG00000153165	RGPD3	RANBP2-like and GRIP domain containing 3	protein-coding
hypo103	chr14:99176501-99177050	Intergenic	NM_001346979	283598	NM_182560	ENSG00000176605	C14orf177	chromosome 14 open reading frame 177	protein-coding
hypo104	chr12:52967411-52967960	promoter-TSS (NM_175053)	NM_175053	121391	NM_175053	ENSG00000170484	KRT74	keratin 74	protein-coding
hypo105	chr4:10080668-10081217	promoter-TSS (NR_036090)	NR_036090	100423011	NR_036090	ENSG00000264931	MIR3138	microRNA 3138	ncRNA
hypo106	chr4:62360840-62361389	intron (NM_015236, intron 2 of 24)	NM_001322246	23284	NM_015236	ENSG00000150471	ADGRL3	adhesion G protein-coupled receptor L3	protein-coding
hypo107	chr1:243266498-243267047	Intergenic	NR_029401	731275	NR_029401	ENSG00000214837	LINC01347	long intergenic non-protein coding RNA 1347	ncRNA
hypo108	chr12:122108462-122109011	Intergenic	NM_173855	283385	NM_173855	ENSG00000139714	MORN3	MORN repeat containing 3	protein-coding
hypo109	chr20:56286944-56287493	promoter-TSS (NM_199171)	NM_199171	56937	NM_020182	ENSG00000124225	PMEPA1	prostate transmembrane protein, androgen induced 1	protein-coding
hypo11	chr1:2565933-2566482	Intergenic	NM_033467	79258	NM_033467	ENSG00000142606	MMEL1	membrane metalloendopeptidase like 1	protein-coding
hypo110	chr17:76208828-76209377	Intergenic	NM_001012270	332	NM_001168	ENSG00000089685	BIRC5	baculoviral IAP repeat containing 5	protein-coding
hypo111	chr6:36643368-36643917	promoter-TSS (NR_109836)	NM_001220777	1026	NM_000389	ENSG00000124762	CDKN1A	cyclin dependent kinase inhibitor 1A	protein-coding
hypo112	chr8:23262624-23263173	Intergenic	NM_002318	4017	NM_002318	ENSG00000134013	LOXL2	lysyl oxidase like 2	protein-coding
hypo113	chrX:100547777-100548326	promoter-TSS (NM_024885)	NM_024885	54457	NM_024885	ENSG00000102387	TAF7L	TATA-box binding protein associated factor 7 like	protein-coding
hypo114	chr6:163476095-163476644	intron (NM_001080379, intron 2 of 4)	NR_110872	101929239	NR_110871	ENSG00000225437	PACRG-AS2	PACRG antisense RNA 2	ncRNA
hypo115	chr2:75938463-75939012	promoter-TSS (NM_003203)	NM_003203	6936	NM_003203	ENSG00000005436	GCFC2	GC-rich sequence DNA-binding factor 2	protein-coding
hypo116	chr19:44575398-44575947	promoter-TSS (NM_001037813)	NM_001037813	342909	NM_001037813	ENSG00000186026	ZNF284	zinc finger protein 284	protein-coding
hypo117	chr9:119449846-119450395	promoter-TSS (NM_198186)	NM_001099679	22954	NM_012210	ENSG00000119401	TRIM32	tripartite motif containing 32	protein-coding
hypo118	chr18:44544959-44545508	promoter-TSS (NM_001242907)	NM_001242907	100506888	NM_001242907	ENSG00000274744	ELOA3D	elongin A3 family member D	protein-coding
hypo119	chr19:11690005-11690554	promoter-TSS (NM_001111034)	NM_001111035	54	NM_001611	ENSG00000102575	ACP5	acid phosphatase 5, tartrate resistant	protein-coding
hypo12	chr3:153837893-153838442	promoter-TSS (NM_001251962)	NM_001251962	26084	NM_015595	ENSG00000114790	ARHGEF26	Rho guanine nucleotide exchange factor 26	protein-coding
hypo120	chr19:11690153-11690702	promoter-TSS (NM_001111034)	NM_001111035	54	NM_001611	ENSG00000102575	ACP5	acid phosphatase 5, tartrate resistant	protein-coding
hypo121	chr19:42895346-42895895	Intergenic	NM_032488	84518	NM_032488	ENSG00000105427	CNFN	cornifelin	protein-coding
hypo122	chr17:4980305-4980854	Intergenic	NM_153018	124961	NM_153018	ENSG00000180787	ZFP3	ZFP3 zinc finger protein	protein-coding
hypo123	chr1:28906236-28906785	promoter-TSS (NR_002987)	NR_002987	677838	NR_002987	ENSG00000278274	SNORA61	small nucleolar RNA, H/ACA box 61	snoRNA
hypo124	chr7:44040140-44040689	promoter-TSS (NM_175064)	NM_175064	285955	NM_175064	ENSG00000136206	SPDYE1	speedy/RINGO cell cycle regulator family member E1	protein-coding
hypo125	chr7:123484324-123484873	promoter-TSS (NM_012269)	NM_012269	23553	NM_012269	ENSG00000106302	HYAL4	hyaluronoglucosaminidase 4	protein-coding
hypo126	chr12:12262887-12263436	Intergenic	NR_128710	103504734	NR_128710	ENSG00000283475	MIR1244-4	microRNA 1244-4	ncRNA
hypo127	chrX:56257971-56258520	promoter-TSS (NR_136705)	NR_136705	11279	NM_007250	ENSG00000102349	KLF8	Kruppel like factor 8	protein-coding
hypo128	chrX:56257923-56258472	promoter-TSS (NR_136705)	NR_136705	11279	NM_007250	ENSG00000102349	KLF8	Kruppel like factor 8	protein-coding
hypo129	chr12:53575882-53576431	intron (NM_001004304, intron 2 of 6)	NM_001244705	51380	NM_015989	ENSG00000139631	CSAD	cysteine sulfinic acid decarboxylase	protein-coding
hypo13	chr18:32957653-32958202	promoter-TSS (NM_001322290)	NM_145756	252884	NM_145756	ENSG00000186496	ZNF396	zinc finger protein 396	protein-coding
hypo130	chr2:101595075-101595624	intron (NM_002518, intron 15 of 20)	NR_110213	101927142	NR_110213		LOC101927142	uncharacterized LOC101927142	ncRNA
hypo131	chr19:52491531-52492080	Intergenic	NM_021632	59348	NM_021632	ENSG00000256683	ZNF350	zinc finger protein 350	protein-coding
hypo132	chr8:41910407-41910956	intron (NR_136589, intron 1 of 1)	NM_001305878	7994	NM_006766	ENSG00000083168	KAT6A	lysine acetyltransferase 6A	protein-coding
hypo133	chr9:119449894-119450443	promoter-TSS (NM_198186)	NM_001099679	22954	NM_012210	ENSG00000119401	TRIM32	tripartite motif containing 32	protein-coding
hypo134	chr1:87379436-87379985	promoter-TSS (NM_001134492)	NM_203341	9403	NM_004261	ENSG00000183291	SELENOF	selenoprotein F	protein-coding
hypo135	chr6:149061-149610	Intergenic	NR_109817	441123	NR_109817		LINC00266-3	long intergenic non-protein coding RNA 266-3	ncRNA
hypo136	chr16:71658607-71659156	Intergenic	NM_001271329	91862	NM_052858	ENSG00000140832	MARVELD3	MARVEL domain containing 3	protein-coding
hypo137	chr22:51017998-51018547	intron (NR_027928, intron 8 of 29)	NM_001145134	1375	NM_004377	ENSG00000205560	CPT1B	carnitine palmitoyltransferase 1B	protein-coding
hypo138	chr15:101793589-101794138	Intergenic	NM_014918	22856	NM_014918	ENSG00000131873	CHSY1	chondroitin sulfate synthase 1	protein-coding
hypo139	chr5:126110316-126110865	intron (NR_134485, intron 1 of 3)	NR_134485	102723557	NR_134485	ENSG00000251072	LOC102723557	uncharacterized LOC102723557	ncRNA
hypo14	chr14:92573867-92574416	Intergenic	NR_028460	4287	NM_004993	ENSG00000066427	ATXN3	ataxin 3	protein-coding
hypo140	chr19:18261989-18262538	3' UTR (NM_015016, exon 27 of 27)	NM_005027	5296	NM_005027	ENSG00000105647	PIK3R2	phosphoinositide-3-kinase regulatory subunit 2	protein-coding
hypo141	chr12:94132501-94133050	TTS (NM_001320101)	NR_110093	101928731	NR_110092	ENSG00000258274	LOC101928731	uncharacterized LOC101928731	ncRNA
hypo142	chr17:37010405-37010954	promoter-TSS (NM_000978)	NM_000978	9349	NM_000978	ENSG00000125691	RPL23	ribosomal protein L23	protein-coding
hypo143	chr7:50132662-50133211	promoter-TSS (NM_001159878)	NM_001159878	11055	NM_007009	ENSG00000042813	ZPBP	zona pellucida binding protein	protein-coding
hypo144	chr22:51017958-51018507	exon (NM_005198, exon 9 of 11)	NM_001145134	1375	NM_004377	ENSG00000205560	CPT1B	carnitine palmitoyltransferase 1B	protein-coding
hypo145	chr21:31747498-31748047	promoter-TSS (NR_036221)	NR_036221	100422891	NR_036221	ENSG00000265007	MIR4327	microRNA 4327	ncRNA
hypo146	chr12:58136846-58137395	Intergenic	NM_014770	116986	NM_014770	ENSG00000135439	AGAP2	ArfGAP with GTPase domain, ankyrin repeat and PH domain 2	protein-coding
hypo147	chrX:2957513-2958062	promoter-TSS (NM_001201538)	NM_001201538	416	NM_004042	ENSG00000062096	ARSF	arylsulfatase F	protein-coding
hypo148	chr19:4833206-4833755	Intergenic	NM_182919	148022	NM_014261	ENSG00000127666	TICAM1	toll like receptor adaptor molecule 1	protein-coding
hypo149	chr3:44553034-44553583	Intergenic	NM_001287349	285346	NM_001287349	ENSG00000178917	ZNF852	zinc finger protein 852	protein-coding
hypo15	chrX:69500573-69501122	intron (NM_004312, intron 15 of 16)	NM_001032726	347517	NM_001032726	ENSG00000147127	RAB41	RAB41, member RAS oncogene family	protein-coding
hypo150	chr5:1180172-1180721	Intergenic	NR_109911	101928857	NR_109911	ENSG00000249201	CTD-3080P12.3	uncharacterized LOC101928857	ncRNA
hypo151	chrX:47228550-47229099	Intergenic	NM_003446	7712	NM_003446	ENSG00000147117	ZNF157	zinc finger protein 157	protein-coding
hypo152	chr5:175296502-175297051	intron (NM_006650, intron 2 of 4)	NM_001008220	10814	NM_006650	ENSG00000145920	CPLX2	complexin 2	protein-coding
hypo153	chr19:45145649-45146198	Intergenic	NM_001135770	5817	NM_006505	ENSG00000073008	PVR	poliovirus receptor	protein-coding
hypo154	chr19:10562184-10562733	intron (NM_001111309, intron 6 of 14)	NM_006202	5141	NM_006202	ENSG00000065989	PDE4A	phosphodiesterase 4A	protein-coding
hypo155	chrX:100547861-100548410	promoter-TSS (NM_024885)	NM_024885	54457	NM_024885	ENSG00000102387	TAF7L	TATA-box binding protein associated factor 7 like	protein-coding
hypo156	chr6:34723972-34724521	promoter-TSS (NR_029472)	NM_003093	6631	NM_003093	ENSG00000124562	SNRPC	small nuclear ribonucleoprotein polypeptide C	protein-coding
hypo157	chr2:158185598-158186147	Intergenic	NM_001009959	57471	NM_020711	ENSG00000136541	ERMN	ermin	protein-coding
hypo158	chr1:146991151-146991700	Intergenic	NR_038423	100289211	NR_038423	ENSG00000278811	LINC00624	long intergenic non-protein coding RNA 624	ncRNA
hypo159	chr20:56287122-56287671	promoter-TSS (NM_199171)	NM_199171	56937	NM_020182	ENSG00000124225	PMEPA1	prostate transmembrane protein, androgen induced 1	protein-coding
hypo16	chr16:89722213-89722762	intron (NR_046418, intron 1 of 6)	NM_153025	124045	NM_153025	ENSG00000167523	SPATA33	spermatogenesis associated 33	protein-coding
hypo160	chr19:50401049-50401598	intron (NR_047577, intron 4 of 10)	NM_152899	259307	NM_152899	ENSG00000104951	IL4I1	interleukin 4 induced 1	protein-coding
hypo161	chr20:13763673-13764222	intron (NM_001276380, intron 1 of 13)	NM_016649	51575	NM_016649	ENSG00000089048	ESF1	ESF1 nucleolar pre-rRNA processing protein homolog	protein-coding
hypo162	chr1:569245-569794	Intergenic	NR_106781	102465432	NR_106781	ENSG00000278791	MIR6723	microRNA 6723	ncRNA
hypo163	chr6:32819939-32820488	exon (NM_001292022, exon 2 of 11).4	NM_001292022	6890	NM_000593	ENSG00000168394	TAP1	transporter 1, ATP binding cassette subfamily B member	protein-coding
hypo164	chr8:6480643-6481192	intron (NM_024596, intron 13 of 13)	NR_107022	102465861	NR_107022	ENSG00000276580	MIR8055	microRNA 8055	ncRNA
hypo165	chr20:5427846-5428395	Intergenic	NR_038239	100507629	NR_038239	ENSG00000226995	LINC00658	long intergenic non-protein coding RNA 658	ncRNA
hypo166	chr5:126110846-126111395	intron (NR_134485, intron 1 of 3)	NR_134485	102723557	NR_134485	ENSG00000251072	LOC102723557	uncharacterized LOC102723557	ncRNA
hypo167	chr19:36234803-36235352	non-coding (NR_110172, exon 4 of 6)	NR_110171	199746	NM_144987	ENSG00000161265	U2AF1L4	U2 small nuclear RNA auxiliary factor 1 like 4	protein-coding
hypo168	chr14:50357737-50358286	Intergenic	NM_001663	382	NM_001663	ENSG00000165527	ARF6	ADP ribosylation factor 6	protein-coding
hypo169	chr5:270837-271386	promoter-TSS (NM_013232)	NR_104613	102467073	NR_104613		HRAT5	heart tissue-associated transcript 5	ncRNA
hypo17	chr16:89722153-89722702	intron (NR_046418, intron 1 of 6)	NM_153025	124045	NM_153025	ENSG00000167523	SPATA33	spermatogenesis associated 33	protein-coding
hypo170	chr10:99348001-99348550	intron (NM_001134670, intron 1 of 2)	NM_001009997	414157	NM_001009997	ENSG00000203942	C10orf62	chromosome 10 open reading frame 62	protein-coding
hypo171	chr12:7052304-7052853	promoter-TSS (NM_001301834)	NM_001301836	113246	NM_138425	ENSG00000111678	C12orf57	chromosome 12 open reading frame 57	protein-coding
hypo172	chr14:90721445-90721994	Intergenic	NM_002802	5700	NM_002802	ENSG00000100764	PSMC1	proteasome 26S subunit, ATPase 1	protein-coding
hypo173	chr6:143891928-143892477	Intergenic	NR_027113	285740	NR_027113	ENSG00000235740	PHACTR2-AS1	PHACTR2 antisense RNA 1	ncRNA
hypo174	chr2:88383020-88383569	intron (NM_001330364, intron 1 of 8)	NR_039940	100616447	NR_039940	ENSG00000265003	MIR4780	microRNA 4780	ncRNA
hypo175	chr17:74640272-74640821	promoter-TSS (NM_001289107)	NR_110309	55808	NM_018414	ENSG00000070526	ST6GALNAC1	ST6 N-acetylgalactosaminide alpha-2,6-sialyltransferase 1	protein-coding
hypo176	chr3:51937188-51937737	promoter-TSS (NM_152397)	NM_152397	132141	NM_152397	ENSG00000173389	IQCF1	IQ motif containing F1	protein-coding
hypo177	chr11:71135302-71135851	Intergenic	NR_038862	399923	NM_001001680	ENSG00000172900	FLJ42102	uncharacterized LOC399923	ncRNA
hypo178	chr10:111683663-111684212	promoter-TSS (NM_001324128)	NM_001324128	7511	NM_020383	ENSG00000108039	XPNPEP1	X-prolyl aminopeptidase 1	protein-coding
hypo179	chrX:67717175-67717724	Intergenic	NM_001195214	286451	NM_173834	ENSG00000181704	YIPF6	Yip1 domain family member 6	protein-coding
hypo18	chr7:56606175-56606724	promoter-TSS (NR_108099)	NR_108099	101928401	NR_108099	ENSG00000233288	LOC101928401	uncharacterized LOC101928401	ncRNA
hypo180	chr16:854544-855093	promoter-TSS (NM_001013638)	NM_001013638	388199	NM_001013638	ENSG00000167945	PRR25	proline rich 25	protein-coding
hypo181	chr12:31079489-31080038	promoter-TSS (NM_001080509)	NM_001080509	441631	NM_001080509	ENSG00000110900	TSPAN11	tetraspanin 11	protein-coding
hypo182	chr17:22020438-22020987	Intergenic	NM_001190452	100462977	NM_001190452	ENSG00000256618	MTRNR2L1	MT-RNR2-like 1	protein-coding
hypo183	chr1:93258313-93258862	promoter-TSS (NM_001308248)	NM_005665	7813	NM_005665	ENSG00000067208	EVI5	ecotropic viral integration site 5	protein-coding
hypo184	chr14:97409567-97410116	promoter-TSS (NR_104113)	NR_104113	145249	NR_104113	ENSG00000225163	LINC00618	long intergenic non-protein coding RNA 618	ncRNA
hypo185	chrX:2957376-2957925	promoter-TSS (NM_001201538)	NM_001201538	416	NM_004042	ENSG00000062096	ARSF	arylsulfatase F	protein-coding
hypo186	chr2:75938634-75939183	promoter-TSS (NM_003203)	NM_003203	6936	NM_003203	ENSG00000005436	GCFC2	GC-rich sequence DNA-binding factor 2	protein-coding
hypo187	chr7:38379179-38379728	Intergenic	NR_040085	100506776	NR_040085	ENSG00000281103	TRG-AS1	T cell receptor gamma locus antisense RNA 1	ncRNA
hypo188	chr6:7388063-7388612	intron (NM_001170693, intron 1 of 12)	NM_001170693	285782	NM_175745	ENSG00000164304	CAGE1	cancer antigen 1	protein-coding
hypo189	chr14:64762030-64762579	intron (NM_001291723, intron 1 of 8)	NM_001040275	2100	NM_001437	ENSG00000140009	ESR2	estrogen receptor 2	protein-coding
hypo19	chr2:219144713-219145262	promoter-TSS (NR_106768)	NR_106768	102465256	NR_106768	ENSG00000135926	MIR6513	microRNA 6513	ncRNA
hypo190	chrX:24762209-24762758	promoter-TSS (NR_003007)	NR_003007	677773	NR_003007	ENSG00000251869	SCARNA23	small Cajal body-specific RNA 23	ncRNA
hypo191	chr3:44553584-44554133	Intergenic	NM_001287349	285346	NM_001287349	ENSG00000178917	ZNF852	zinc finger protein 852	protein-coding
hypo192	chr9:119450444-119450993	intron (NM_001099679, intron 1 of 1)	NM_001099679	22954	NM_012210	ENSG00000119401	TRIM32	tripartite motif containing 32	protein-coding
hypo193	chr12:15375863-15376412	Intergenic	NM_001190726	85004	NM_032918	ENSG00000134533	RERG	RAS like estrogen regulated growth inhibitor	protein-coding
hypo194	chr19:54290030-54290579	promoter-TSS (NR_029864)	NR_029864	442916	NR_029864	ENSG00000199031	MIR371A	microRNA 371a	ncRNA
hypo195	chr22:36683855-36684404	intron (NM_002473, intron 34 of 40)	NR_106877	102465491	NR_106877	ENSG00000278420	MIR6819	microRNA 6819	ncRNA
hypo196	chr11:57478546-57479095	intron (NM_153450, intron 1 of 3)	NM_001317078	219541	NM_153450	ENSG00000156603	MED19	mediator complex subunit 19	protein-coding
hypo197	chr6:32143718-32144267	promoter-TSS (NM_006411).4	NM_006411	10554	NM_006411	ENSG00000204310	AGPAT1	1-acylglycerol-3-phosphate O-acyltransferase 1	protein-coding
hypo198	chr8:128971980-128972529	promoter-TSS (NR_031610)	NR_031610	100302161	NR_031610	ENSG00000221771	MIR1205	microRNA 1205	ncRNA
hypo199	chr12:13258082-13258631	Intergenic	NM_001080554	83445	NM_031289	ENSG00000111305	GSG1	germ cell associated 1	protein-coding
hypo2	chr2:54199429-54199978	intron (NM_001320586, intron 1 of 6)	NM_001320586	98	NM_138448	ENSG00000170634	ACYP2	acylphosphatase 2	protein-coding
hypo20	chr1:62901076-62901625	promoter-TSS (NM_001017415)	NM_001017415	7398	NM_003368	ENSG00000162607	USP1	ubiquitin specific peptidase 1	protein-coding
hypo200	chr9:119450396-119450945	intron (NM_001099679, intron 1 of 1)	NM_001099679	22954	NM_012210	ENSG00000119401	TRIM32	tripartite motif containing 32	protein-coding
hypo201	chr19:44615549-44616098	intron (NR_033341, intron 1 of 1)	NR_033341	100379224	NR_033341	ENSG00000186019	LOC100379224	uncharacterized LOC100379224	ncRNA
hypo202	chr11:95524406-95524955	intron (NM_014679, intron 1 of 10)	NM_001243777	9702	NM_014679	ENSG00000166037	CEP57	centrosomal protein 57	protein-coding
hypo203	chrX:100332937-100333486	promoter-TSS (NM_021637)	NM_021637	59353	NM_021637	ENSG00000126950	TMEM35A	transmembrane protein 35A	protein-coding
hypo204	chr8:63999514-64000063	Intergenic	NM_000370	7274	NM_000370	ENSG00000137561	TTPA	alpha tocopherol transfer protein	protein-coding
hypo205	chr15:45877418-45877967	Intergenic	NM_012388	26258	NM_012388	ENSG00000104164	BLOC1S6	biogenesis of lysosomal organelles complex 1 subunit 6	protein-coding
hypo206	chr5:54601577-54602126	intron (NM_019030, intron 1 of 26)	NM_019030	54505	NM_019030	ENSG00000067248	DHX29	DExH-box helicase 29	protein-coding
hypo207	chr4:54364245-54364794	intron (NM_001126328, intron 5 of 10)	NR_046622	100873939	NR_046622	ENSG00000250930	LNX1-AS1	LNX1 antisense RNA 1	ncRNA
hypo208	chr4:7460856-7461405	promoter-TSS (NR_036238)	NR_036238	100422826	NR_036238	ENSG00000266690	MIR4274	microRNA 4274	ncRNA
hypo209	chr18:44544409-44544958	promoter-TSS (NM_001242907)	NM_001242907	100506888	NM_001242907	ENSG00000274744	ELOA3D	elongin A3 family member D	protein-coding
hypo21	chr13:30500590-30501139	promoter-TSS (NR_047501)	NR_047501	100861573	NR_047501	ENSG00000224405	LINC00572	long intergenic non-protein coding RNA 572	ncRNA
hypo210	chr11:61128024-61128573	intron (NM_153611, intron 1 of 6)	NM_001330281	51524	NM_016464	ENSG00000149483	TMEM138	transmembrane protein 138	protein-coding
hypo211	chr15:31195177-31195726	promoter-TSS (NM_001146096)	NM_001146095	22909	NM_014967	ENSG00000198690	FAN1	FANCD2 and FANCI associated nuclease 1	protein-coding
hypo212	chr15:31195156-31195705	promoter-TSS (NM_001146096)	NM_001146095	22909	NM_014967	ENSG00000198690	FAN1	FANCD2 and FANCI associated nuclease 1	protein-coding
hypo213	chrX:136113635-136114184	promoter-TSS (NM_054021)	NM_054021	83550	NM_054021	ENSG00000165370	GPR101	G protein-coupled receptor 101	protein-coding
hypo214	chr18:44544723-44545272	promoter-TSS (NM_001242907)	NM_001242907	100506888	NM_001242907	ENSG00000274744	ELOA3D	elongin A3 family member D	protein-coding
hypo215	chr11:20042653-20043202	intron (NM_182964, intron 11 of 37)	NM_001111019	89797	NM_145117	ENSG00000166833	NAV2	neuron navigator 2	protein-coding
hypo216	chr19:58010410-58010959	promoter-TSS (NM_001304334)	NM_001304336	374928	NM_198542	ENSG00000152439	ZNF773	zinc finger protein 773	protein-coding
hypo217	chr22:19512662-19513211	promoter-TSS (NM_003277)	NM_003277	7122	NM_003277	ENSG00000184113	CLDN5	claudin 5	protein-coding
hypo218	chr3:157823754-157824303	promoter-TSS (NM_001163678)	NM_003030	6474	NM_003030	ENSG00000168779	SHOX2	short stature homeobox 2	protein-coding
hypo219	chr11:8191492-8192041	Intergenic	NM_001206672	79608	NM_024557	ENSG00000166405	RIC3	RIC3 acetylcholine receptor chaperone	protein-coding
hypo22	chr7:148393934-148394483	Intergenic	NM_003592	8454	NM_003592	ENSG00000055130	CUL1	cullin 1	protein-coding
hypo220	chrX:84257449-84257998	Intergenic	NM_198450	139322	NM_198450	ENSG00000155008	APOOL	apolipoprotein O like	protein-coding
hypo221	chr11:9287225-9287774	promoter-TSS (NM_015213)	NM_001243254	23258	NM_015213	ENSG00000184014	DENND5A	DENN domain containing 5A	protein-coding
hypo222	chr12:58162428-58162977	3' UTR (NM_005371, exon 6 of 6)	NM_000785	1594	NM_000785	ENSG00000111012	CYP27B1	cytochrome P450 family 27 subfamily B member 1	protein-coding
hypo223	chr20:62198909-62199458	promoter-TSS (NM_033405)	NM_033405	85441	NM_033405	ENSG00000130589	HELZ2	helicase with zinc finger 2	protein-coding
hypo224	chr22:30277709-30278258	Intergenic	NM_021090	8897	NM_021090	ENSG00000100330	MTMR3	myotubularin related protein 3	protein-coding
hypo225	chrX:49777207-49777756	promoter-TSS (NR_030397)	NR_030397	724030	NR_030397	ENSG00000207970	MIR660	microRNA 660	ncRNA
hypo226	chrX:24667841-24668390	promoter-TSS (NR_046638)	NR_046638	100874088	NR_046638	ENSG00000236836	PCYT1B-AS1	PCYT1B antisense RNA 1	ncRNA
hypo227	chr11:124093399-124093948	Intergenic	NM_001291438	26492	NM_001291438		OR8G2	olfactory receptor family 8 subfamily G member 2	protein-coding
hypo228	chr1:33430088-33430637	promoter-TSS (NM_153341)	NM_001300826	127544	NM_153341	ENSG00000116514	RNF19B	ring finger protein 19B	protein-coding
hypo229	chr19:36234479-36235028	exon (NM_144987, exon 5 of 6)	NR_144339	79713	NM_024660	ENSG00000126246	IGFLR1	IGF like family receptor 1	protein-coding
hypo23	chr13:51747976-51748525	Intergenic	NR_102431	647166	NR_102431		LINC00371	long intergenic non-protein coding RNA 371	ncRNA
hypo230	chr7:6524201-6524750	promoter-TSS (NM_006854)	NM_006854	11014	NM_006854	ENSG00000136240	KDELR2	KDEL endoplasmic reticulum protein retention receptor 2	protein-coding
hypo231	chr17:18646977-18647526	promoter-TSS (NM_001267585)	NM_001267586	10517	NM_031456	ENSG00000171931	FBXW10	F-box and WD repeat domain containing 10	protein-coding
hypo232	chrX:47520031-47520580	TTS (NR_028119)	NR_045559	8409	NM_004182	ENSG00000126756	UXT	ubiquitously expressed prefoldin like chaperone	protein-coding
hypo233	chr16:31365006-31365555	Intergenic	NM_001286375	3687	NM_000887	ENSG00000140678	ITGAX	integrin subunit alpha X	protein-coding
hypo234	chrX:49644861-49645410	exon (NM_001145073, exon 1 of 1)	NM_001145073	389856	NM_001145073	ENSG00000273820	USP27X	ubiquitin specific peptidase 27, X-linked	protein-coding
hypo235	chr16:75657573-75658122	promoter-TSS (NM_001324444)	NM_001324445	23536	NM_012091	ENSG00000065457	ADAT1	adenosine deaminase, tRNA specific 1	protein-coding
hypo236	chrX:62976483-62977032	intron (NM_001330495, intron 1 of 10)	NM_001173480	23229	NM_015185	ENSG00000131089	ARHGEF9	Cdc42 guanine nucleotide exchange factor 9	protein-coding
hypo237	chr5:180335665-180336214	promoter-TSS (NM_001159710)	NM_001159710	79908	NM_024850	ENSG00000113303	BTNL8	butyrophilin like 8	protein-coding
hypo238	chr8:55046332-55046881	Intergenic	NM_014175	29088	NM_014175	ENSG00000137547	MRPL15	mitochondrial ribosomal protein L15	protein-coding
hypo239	chr9:119319-119868	Intergenic	NM_207305	2298	NM_207305	ENSG00000170122	FOXD4	forkhead box D4	protein-coding
hypo24	chr20:3765970-3766519	exon (NM_001810, exon 1 of 1)	NM_001810	1059	NM_001810	ENSG00000125817	CENPB	centromere protein B	protein-coding
hypo240	chr1:209999863-210000412	Intergenic	NM_014388	27042	NM_014388	ENSG00000117597	DIEXF	digestive organ expansion factor homolog (zebrafish)	protein-coding
hypo241	chr22:21634715-21635264	Intergenic	NR_024583	29797	NM_001029950		POM121L8P	POM121 transmembrane nucleoporin like 8, pseudogene	pseudo
hypo242	chr6:46459412-46459961	promoter-TSS (NM_001251974)	NR_125837	101926898	NR_125837		LOC101926898	uncharacterized LOC101926898	ncRNA
hypo243	chr19:10827830-10828379	promoter-TSS (NM_001190716)	NM_001005361	1785	NM_004945	ENSG00000079805	DNM2	dynamin 2	protein-coding
hypo244	chr10:106113685-106114234	promoter-TSS (NR_108036)	NM_001008723	159686	NM_001008723	ENSG00000120051	CFAP58	cilia and flagella associated protein 58	protein-coding
hypo245	chr19:35519593-35520142	Intergenic	NM_001037	6324	NM_001037	ENSG00000105711	SCN1B	sodium voltage-gated channel beta subunit 1	protein-coding
hypo246	chrX:47229100-47229649	promoter-TSS (NM_003446)	NM_003446	7712	NM_003446	ENSG00000147117	ZNF157	zinc finger protein 157	protein-coding
hypo247	chr18:30051899-30052448	Intergenic	NM_001242409	64762	NM_022751	ENSG00000141441	GAREM1	GRB2 associated regulator of MAPK1 subtype 1	protein-coding
hypo248	chrX:100308007-100308556	Intergenic	NM_001167970	79979	NM_024917	ENSG00000188917	TRMT2B	tRNA methyltransferase 2 homolog B	protein-coding
hypo249	chr10:21436940-21437489	intron (NM_001173484, intron 2 of 6)	NM_001010896	387638	NM_001010896	ENSG00000204683	C10orf113	chromosome 10 open reading frame 113	protein-coding
hypo25	chr7:17337377-17337926	promoter-TSS (NM_001621)	NM_001621	196	NM_001621	ENSG00000106546	AHR	aryl hydrocarbon receptor	protein-coding
hypo250	chr4:76599569-76600118	Intergenic	NM_203504	9908	NM_012297	ENSG00000138757	G3BP2	G3BP stress granule assembly factor 2	protein-coding
hypo251	chr4:190994134-190994683	Intergenic	NR_121644	100419743	NR_121644	ENSG00000281591	DBET	D4Z4 binding element transcript (non-protein coding)	ncRNA
hypo252	chrX:65383723-65384272	promoter-TSS (NM_001282141)	NM_001130860	9843	NM_014799	ENSG00000089472	HEPH	hephaestin	protein-coding
hypo253	chr7:138722227-138722776	Intergenic	NM_080660	92092	NM_080660	ENSG00000146858	ZC3HAV1L	zinc finger CCCH-type containing, antiviral 1 like	protein-coding
hypo254	chr19:58893291-58893840	Intergenic	NM_138466	116412	NM_138466	ENSG00000152475	ZNF837	zinc finger protein 837	protein-coding
hypo255	chr3:75786532-75787081	promoter-TSS (NR_036235).2	NR_036235	100422955	NR_036235	ENSG00000266396	MIR4273	microRNA 4273	ncRNA
hypo256	chr10:92630260-92630809	Intergenic	NM_001104546	10556	NM_006413	ENSG00000148688	RPP30	ribonuclease P/MRP subunit p30	protein-coding
hypo257	chr6:161121226-161121775	Intergenic	NM_001168338	5340	NM_000301	ENSG00000122194	PLG	plasminogen	protein-coding
hypo258	chr2:64246566-64247115	promoter-TSS (NM_016516)	NM_016516	51542	NM_016516	ENSG00000143952	VPS54	VPS54, GARP complex subunit	protein-coding
hypo259	chrX:90689800-90690349	promoter-TSS (NR_110659)	NR_110659	102724167	NR_110659	ENSG00000234161	PABPC5-AS1	PABPC5 antisense RNA 1	ncRNA
hypo26	chr11:47374055-47374604	promoter-TSS (NM_000256)	NM_000256	4607	NM_000256	ENSG00000134571	MYBPC3	myosin binding protein C, cardiac	protein-coding
hypo260	chrX:119006693-119007242	intron (NM_004541, intron 1 of 2)	NM_006978	7737	NM_006978	ENSG00000125352	RNF113A	ring finger protein 113A	protein-coding
hypo261	chr1:173572585-173573134	promoter-TSS (NM_178527)	NM_178527	284525	NM_178527	ENSG00000162753	SLC9C2	solute carrier family 9 member C2 (putative)	protein-coding
hypo262	chr9:85882004-85882553	promoter-TSS (NM_001244962)	NM_001244962	257019	NM_174938	ENSG00000172159	FRMD3	FERM domain containing 3	protein-coding
hypo263	chr22:22988433-22988982	promoter-TSS (NM_199127)	NM_199127	91227	NM_080839	ENSG00000100121	GGTLC2	gamma-glutamyltransferase light chain 2	protein-coding
hypo264	chr22:22988464-22989013	promoter-TSS (NM_199127)	NM_199127	91227	NM_080839	ENSG00000100121	GGTLC2	gamma-glutamyltransferase light chain 2	protein-coding
hypo265	chr4:4250286-4250835	promoter-TSS (NM_001297551)	NM_001297551	85013	NM_032927	ENSG00000132406	TMEM128	transmembrane protein 128	protein-coding
hypo266	chr4:76599795-76600344	Intergenic	NM_203504	9908	NM_012297	ENSG00000138757	G3BP2	G3BP stress granule assembly factor 2	protein-coding
hypo267	chr17:686473-687022	intron (NM_018146, intron 2 of 3)	NM_016080	51031	NM_016080	ENSG00000167699	GLOD4	glyoxalase domain containing 4	protein-coding
hypo268	chr6:88299436-88299985	promoter-TSS (NR_134857)	NR_134857	57038	NM_020320	ENSG00000146282	RARS2	arginyl-tRNA synthetase 2, mitochondrial	protein-coding
hypo269	chr18:47013996-47014545	promoter-TSS (NM_001035005)	NR_031720	100302257	NR_031720	ENSG00000265496	MIR1539	microRNA 1539	ncRNA
hypo27	chr4:7311278-7311827	promoter-TSS (NR_039961)	NR_039961	100616471	NR_039961	ENSG00000264658	MIR4798	microRNA 4798	ncRNA
hypo270	chr11:61975791-61976340	promoter-TSS (NM_002407)	NM_002407	4246	NM_002407	ENSG00000124939	SCGB2A1	secretoglobin family 2A member 1	protein-coding
hypo271	chr4:38807864-38808413	Intergenic	NM_003263	7096	NM_003263	ENSG00000174125	TLR1	toll like receptor 1	protein-coding
hypo272	chrX:137793370-137793919	promoter-TSS (NR_038405)	NM_004114	2258	NM_004114	ENSG00000129682	FGF13	fibroblast growth factor 13	protein-coding
hypo273	chrX:100353349-100353898	intron (NM_001318521, intron 2 of 20)	NM_001318521	2491	NM_006733	ENSG00000102384	CENPI	centromere protein I	protein-coding
hypo274	chr19:41945283-41945832	promoter-TSS (NM_001167868)	NM_001167867	55101	NM_018035	ENSG00000105341	ATP5SL	ATP5S like	protein-coding
hypo275	chr6:53882265-53882814	Intergenic	NM_001281746	90523	NM_138569	ENSG00000146147	MLIP	muscular LMNA interacting protein	protein-coding
hypo276	chr6:88299537-88300086	promoter-TSS (NR_134857)	NM_181837	23595	NM_012381	ENSG00000135336	ORC3	origin recognition complex subunit 3	protein-coding
hypo277	chr1:155243633-155244182	promoter-TSS (NM_003993)	NM_003993	1196	NM_001291	ENSG00000176444	CLK2	CDC like kinase 2	protein-coding
hypo278	chr22:44963771-44964320	Intergenic	NR_028409	388910	NM_001012986	ENSG00000187012	LINC00207	long intergenic non-protein coding RNA 207	ncRNA
hypo279	chr3:136472697-136473246	Intergenic	NM_005862	10274	NM_005862	ENSG00000118007	STAG1	stromal antigen 1	protein-coding
hypo28	chr19:43532083-43532632	Intergenic	NM_002785	5680	NM_002785	ENSG00000243130	PSG11	pregnancy specific beta-1-glycoprotein 11	protein-coding
hypo280	chrX:9981796-9982345	Intergenic	NM_015691	55841	NM_015691	ENSG00000047644	WWC3	WWC family member 3	protein-coding
hypo281	chr15:25451060-25451609	promoter-TSS (NR_003312)	NR_003313	100033603	NR_003313	ENSG00000199833	SNORD115-21	small nucleolar RNA, C/D box 115-21	snoRNA
hypo282	chrX:100353899-100354448	promoter-TSS (NM_006733)	NM_006733	2491	NM_006733	ENSG00000102384	CENPI	centromere protein I	protein-coding
hypo283	chr3:49158723-49159272	promoter-TSS (NM_001199161)	NM_006677	10869	NM_006677	ENSG00000172046	USP19	ubiquitin specific peptidase 19	protein-coding
hypo284	chr7:100316424-100316973	Intergenic	NM_000799	2056	NM_000799	ENSG00000130427	EPO	erythropoietin	protein-coding
hypo285	chr5:133840794-133841343	Intergenic	NR_105045	101927934	NR_105045	ENSG00000251169	LINC01843	long intergenic non-protein coding RNA 1843	ncRNA
hypo286	chr17:37070333-37070882	promoter-TSS (NR_106837)	NR_106837	102465467	NR_106837	ENSG00000277057	MIR6779	microRNA 6779	ncRNA
hypo287	chr6:49937140-49937689	promoter-TSS (NM_001037729)	NM_001037729	245927	NM_001037729	ENSG00000214642	DEFB113	defensin beta 113	protein-coding
hypo288	chrX:118708081-118708630	promoter-TSS (NM_181762)	NM_181762	7319	NM_003336	ENSG00000077721	UBE2A	ubiquitin conjugating enzyme E2 A	protein-coding
hypo289	chrX:117973170-117973719	promoter-TSS (NR_110393)	NR_110393	101928287	NR_110393	ENSG00000203650	LINC01285	long intergenic non-protein coding RNA 1285	ncRNA
hypo29	chr7:17336827-17337376	Intergenic	NM_001621	196	NM_001621	ENSG00000106546	AHR	aryl hydrocarbon receptor	protein-coding
hypo290	chr15:25314679-25315228	promoter-TSS (NR_003323)	NR_003323	100033420	NR_003323	ENSG00000207093	SNORD116-8	small nucleolar RNA, C/D box 116-8	snoRNA
hypo291	chr14:68167154-68167703	Intergenic	NM_152443	145226	NM_152443	ENSG00000139988	RDH12	retinol dehydrogenase 12 (all-trans/9-cis/11-cis)	protein-coding
hypo292	chr4:99852688-99853237	Intergenic	NM_001130679	1977	NM_001968	ENSG00000151247	EIF4E	eukaryotic translation initiation factor 4E	protein-coding
hypo293	chrX:118827135-118827684	promoter-TSS (NM_145799)	NM_145802	23157	NM_015129	ENSG00000125354	2018-09-06	septin 6	protein-coding
hypo294	chrX:15353478-15354027	promoter-TSS (NM_020473)	NR_033836	5277	NM_002641	ENSG00000165195	PIGA	phosphatidylinositol glycan anchor biosynthesis class A	protein-coding
hypo295	chr11:5257310-5257859	Intergenic	NM_000519	3045	NM_000519	ENSG00000223609	HBD	hemoglobin subunit delta	protein-coding
hypo296	chrX:153656629-153657178	promoter-TSS (NM_001183)	NM_001183	537	NM_001183	ENSG00000071553	ATP6AP1	ATPase H+ transporting accessory protein 1	protein-coding
hypo297	chrX:153656627-153657176	promoter-TSS (NM_001183)	NR_103768	158960	NR_103768	ENSG00000197180	CH17-340M24.3	uncharacterized protein BC009467	ncRNA
hypo3	chr21:33782746-33783295	promoter-TSS (NM_001320745)	NM_001320745	59271	NM_058187	ENSG00000166979	EVA1C	eva-1 homolog C	protein-coding
hypo30	chr22:51017448-51017997	promoter-TSS (NM_004377)	NM_001145134	1375	NM_004377	ENSG00000205560	CPT1B	carnitine palmitoyltransferase 1B	protein-coding
hypo31	chr14:51705437-51705986	Intergenic	NM_030755	81542	NM_030755	ENSG00000139921	TMX1	thioredoxin related transmembrane protein 1	protein-coding
hypo32	chr2:25876431-25876980	intron (NM_183361, intron 1 of 17)	NM_001256304	1838	NM_021907	ENSG00000138101	DTNB	dystrobrevin beta	protein-coding
hypo33	chr17:48946791-48947340	Intergenic	NM_001243877	10140	NM_005749	ENSG00000141232	TOB1	transducer of ERBB2, 1	protein-coding
hypo34	chr3:184043135-184043684	promoter-TSS (NR_003055)	NR_003055	692107	NR_003055	ENSG00000212158	SNORD66	small nucleolar RNA, C/D box 66	snoRNA
hypo35	chr9:97402825-97403374	promoter-TSS (NM_001127628)	NM_001127628	2203	NM_000507	ENSG00000165140	FBP1	fructose-bisphosphatase 1	protein-coding
hypo36	chr7:44622729-44623278	Intergenic	NM_001303059	222068	NM_182547	ENSG00000158604	TMED4	transmembrane p24 trafficking protein 4	protein-coding
hypo37	chr10:88730149-88730698	promoter-TSS (NM_133447)	NM_133447	119385	NM_133447		AGAP11	ArfGAP with GTPase domain, ankyrin repeat and PH domain 11	protein-coding
hypo38	chr5:33984582-33985131	promoter-TSS (NM_001297417)	NM_001012509	51151	NM_016180	ENSG00000164175	SLC45A2	solute carrier family 45 member 2	protein-coding
hypo39	chr19:10395644-10396193	exon (NM_000201, exon 7 of 7)	NM_001544	3386	NM_001544	ENSG00000105371	ICAM4	intercellular adhesion molecule 4 (Landsteiner-Wiener blood group)	protein-coding
hypo4	chr5:175488713-175489262	promoter-TSS (NR_103794)	NR_103794	100996385	NR_103794	ENSG00000248469	LOC100996385	uncharacterized LOC100996385	ncRNA
hypo40	chr11:66488672-66489221	promoter-TSS (NM_006946)	NM_006946	6712	NM_006946	ENSG00000173898	SPTBN2	spectrin beta, non-erythrocytic 2	protein-coding
hypo41	chrX:69501123-69501672	promoter-TSS (NM_001032726)	NM_001032726	347517	NM_001032726	ENSG00000147127	RAB41	RAB41, member RAS oncogene family	protein-coding
hypo42	chr12:54867738-54868287	promoter-TSS (NM_144594)	NM_144594	121355	NM_144594	ENSG00000170627	GTSF1	gametocyte specific factor 1	protein-coding
hypo43	chr12:51421376-51421925	intron (NM_001174125, intron 1 of 15)	NM_001174125	4891	NM_000617	ENSG00000110911	SLC11A2	solute carrier family 11 member 2	protein-coding
hypo44	chr11:1786953-1787502	Intergenic	NM_001909	1509	NM_001909	ENSG00000117984	CTSD	cathepsin D	protein-coding
hypo45	chr13:95252655-95253204	Intergenic	NM_180989	160897	NM_180989	ENSG00000152749	GPR180	G protein-coupled receptor 180	protein-coding
hypo46	chr21:44752271-44752820	promoter-TSS (NR_103713)	NR_103713	100126693	NR_103713		LINC00322	long intergenic non-protein coding RNA 322	ncRNA
hypo47	chr1:31713086-31713635	promoter-TSS (NM_024522)	NM_024522	79570	NM_024522	ENSG00000084628	NKAIN1	Sodium/potassium transporting ATPase interacting 1	protein-coding
hypo48	chr17:37010955-37011504	Intergenic	NM_000978	9349	NM_000978	ENSG00000125691	RPL23	ribosomal protein L23	protein-coding
hypo49	chr17:7990823-7991372	promoter-TSS (NR_036201)	NM_001139	242	NM_001139	ENSG00000179477	ALOX12B	arachidonate 12-lipoxygenase, 12R type	protein-coding
hypo5	chr10:88514397-88514946	Intergenic	NM_004329	657	NM_004329	ENSG00000107779	BMPR1A	bone morphogenetic protein receptor type 1A	protein-coding
hypo50	chr17:37010700-37011249	promoter-TSS (NM_000978)	NM_000978	9349	NM_000978	ENSG00000125691	RPL23	ribosomal protein L23	protein-coding
hypo51	chr6:43424264-43424813	promoter-TSS (NM_001286655)	NM_206539	65989	NM_023932	ENSG00000171462	DLK2	delta like non-canonical Notch ligand 2	protein-coding
hypo52	chr20:3765420-3765969	exon (NM_001810, exon 1 of 1)	NM_001810	1059	NM_001810	ENSG00000125817	CENPB	centromere protein B	protein-coding
hypo53	chr8:145753318-145753867	TTS (NM_025251)	NM_001001795	414919	NM_001001795	ENSG00000213563	C8orf82	chromosome 8 open reading frame 82	protein-coding
hypo54	chr2:241832357-241832906	intron (NM_001085437, intron 1 of 4)	NM_001282921	79919	NM_024861	ENSG00000172478	C2orf54	chromosome 2 open reading frame 54	protein-coding
hypo55	chr5:111495733-111496282	promoter-TSS (NR_015370)	NR_015370	114915	NM_053000		EPB41L4A-AS1	EPB41L4A antisense RNA 1	ncRNA
hypo56	chr14:77290726-77291275	Intergenic	NM_194287	145497	NM_194287	ENSG00000100565	LRRC74A	leucine rich repeat containing 74A	protein-coding
hypo57	chr1:221509990-221510539	promoter-TSS (NR_024236)	NR_024236	400804	NR_024236	ENSG00000234754	C1orf140	uncharacterized LOC400804	ncRNA
hypo58	chr2:88382470-88383019	promoter-TSS (NR_039940)	NR_039940	100616447	NR_039940	ENSG00000265003	MIR4780	microRNA 4780	ncRNA
hypo59	chr17:48946241-48946790	TTS (NR_038458)	NM_001243877	10140	NM_005749	ENSG00000141232	TOB1	transducer of ERBB2, 1	protein-coding
hypo6	chr1:70384656-70385205	promoter-TSS (NR_023916)	NR_023916	5301	NR_023916	ENSG00000229359	PIN1P1	peptidylprolyl cis/trans isomerase, NIMA-interacting 1 pseudogene 1	pseudo
hypo60	chr1:15272066-15272615	promoter-TSS (NM_001017999)	NM_001017999	23254	NM_015209	ENSG00000189337	KAZN	kazrin, periplakin interacting protein	protein-coding
hypo61	chr2:28534228-28534777	intron (NR_137438, intron 12 of 12)	NR_038319	100505716	NR_038319	ENSG00000223522	LOC100505716	uncharacterized LOC100505716	ncRNA
hypo62	chr17:19652648-19653197	Intergenic	NM_000691	218	NM_000691	ENSG00000108602	ALDH3A1	aldehyde dehydrogenase 3 family member A1	protein-coding
hypo63	chr6:143765266-143765815	intron (NM_182503, intron 1 of 5)	NM_001286259	134637	NM_182503	ENSG00000189007	ADAT2	adenosine deaminase, tRNA specific 2	protein-coding
hypo64	chr12:79438534-79439083	promoter-TSS (NM_001135806)	NM_001135806	6857	NM_005639	ENSG00000067715	SYT1	synaptotagmin 1	protein-coding
hypo65	chr19:11689944-11690493	promoter-TSS (NM_001111034)	NM_001111035	54	NM_001611	ENSG00000102575	ACP5	acid phosphatase 5, tartrate resistant	protein-coding
hypo66	chr2:219525715-219526264	exon (NM_001320717, exon 3 of 9)	NM_001257342	617	NM_004328	ENSG00000074582	BCS1L	BCS1 homolog, ubiquinol-cytochrome c reductase complex chaperone	protein-coding
hypo67	chr6:143764716-143765265	intron (NM_182503, intron 1 of 5)	NM_001286259	134637	NM_182503	ENSG00000189007	ADAT2	adenosine deaminase, tRNA specific 2	protein-coding
hypo68	chr6:43424172-43424721	promoter-TSS (NM_001286655)	NM_206539	65989	NM_023932	ENSG00000171462	DLK2	delta like non-canonical Notch ligand 2	protein-coding
hypo69	chr3:195868608-195869157	promoter-TSS (NR_034088)	NR_034088	401109	NM_001001699	ENSG00000224652	LINC00885	long intergenic non-protein coding RNA 885	ncRNA
hypo7	chr1:6615560-6616109	intron (NM_177540, intron 1 of 4)	NM_138697	80835	NM_138697	ENSG00000173662	TAS1R1	taste 1 receptor member 1	protein-coding
hypo70	chr1:11107098-11107647	promoter-TSS (NM_139208)	NM_006610	10747	NM_006610	ENSG00000009724	MASP2	mannan binding lectin serine peptidase 2	protein-coding
hypo71	chr12:23738448-23738997	intron (NM_001261415, intron 9 of 14)	NM_178010	6660	NM_006940	ENSG00000134532	SOX5	SRY-box 5	protein-coding
hypo72	chr18:53090075-53090624	promoter-TSS (NM_001243233)	NM_001243233	6925	NM_003199	ENSG00000196628	TCF4	transcription factor 4	protein-coding
hypo73	chr3:153837700-153838249	promoter-TSS (NM_001251962)	NM_001251962	26084	NM_015595	ENSG00000114790	ARHGEF26	Rho guanine nucleotide exchange factor 26	protein-coding
hypo74	chr9:34458920-34459469	promoter-TSS (NM_147202)	NM_001281428	27019	NM_012144	ENSG00000122735	DNAI1	dynein axonemal intermediate chain 1	protein-coding
hypo75	chr4:44678984-44679533	Intergenic	NM_001345868	60558	NM_021927	ENSG00000151806	GUF1	GUF1 homolog, GTPase	protein-coding
hypo76	chr3:64673717-64674266	promoter-TSS (NM_001318781)	NM_001318781	56999	NM_182920	ENSG00000163638	ADAMTS9	ADAM metallopeptidase with thrombospondin type 1 motif 9	protein-coding
hypo77	chr16:21358685-21359234	Intergenic	NR_045011	100652781	NM_001012391		SNX29P1	sorting nexin 29 pseudogene 1	pseudo
hypo78	chr10:111684213-111684762	Intergenic	NM_001324128	7511	NM_020383	ENSG00000108039	XPNPEP1	X-prolyl aminopeptidase 1	protein-coding
hypo79	chr1:28906207-28906756	promoter-TSS (NR_002987)	NR_002987	677838	NR_002987	ENSG00000278274	SNORA61	small nucleolar RNA, H/ACA box 61	snoRNA
hypo8	chr9:35406403-35406952	promoter-TSS (NR_003582)	NR_003582	158381	NR_003581	ENSG00000179766	ATP8B5P	ATPase phospholipid transporting 8B5, pseudogene	pseudo
hypo80	chr19:6530111-6530660	promoter-TSS (NM_003811)	NM_003811	8744	NM_003811	ENSG00000125657	TNFSF9	tumor necrosis factor superfamily member 9	protein-coding
hypo81	chr7:158938551-158939100	Intergenic	NM_001304522	7434	NM_003382	ENSG00000106018	VIPR2	vasoactive intestinal peptide receptor 2	protein-coding
hypo82	chr2:234296451-234297000	promoter-TSS (NM_003648)	NM_003648	8527	NM_003648	ENSG00000077044	DGKD	diacylglycerol kinase delta	protein-coding
hypo83	chr6:46460706-46461255	intron (NR_125837, intron 1 of 2)	NM_001251973	10231	NM_005822	ENSG00000172348	RCAN2	regulator of calcineurin 2	protein-coding
hypo84	chr12:58136785-58137334	Intergenic	NM_014770	116986	NM_014770	ENSG00000135439	AGAP2	ArfGAP with GTPase domain, ankyrin repeat and PH domain 2	protein-coding
hypo85	chr11:1037608-1038157	Intergenic	NM_005961	4588	NM_005961	ENSG00000184956	MUC6	mucin 6, oligomeric mucus/gel-forming	protein-coding
hypo86	chr7:44580716-44581265	promoter-TSS (NM_001101648)	NM_001101648	29881	NM_013389	ENSG00000015520	NPC1L1	NPC1 like intracellular cholesterol transporter 1	protein-coding
hypo87	chr19:49568576-49569125	Intergenic	NM_006179	4909	NM_006179	ENSG00000225950	NTF4	neurotrophin 4	protein-coding
hypo88	chr10:135158845-135159394	Intergenic	NM_145202	118471	NM_145202	ENSG00000165828	PRAP1	proline rich acidic protein 1	protein-coding
hypo89	chr11:778555-779104	intron (NR_126342, intron 2 of 3)	NR_126342	171391	NR_046316	ENSG00000255284	LOC171391	uncharacterized LOC171391	ncRNA
hypo9	chr19:35643626-35644175	intron (NM_022006, intron 5 of 5)	NM_014164	53827	NM_014164	ENSG00000089327	FXYD5	FXYD domain containing ion transport regulator 5	protein-coding
hypo90	chr18:59991621-59992170	promoter-TSS (NM_001278268)	NM_001270950	8792	NM_003839	ENSG00000141655	TNFRSF11A	TNF receptor superfamily member 11a	protein-coding
hypo91	chr11:19596508-19597057	promoter-TSS (NR_039706)	NR_039706	100616118	NR_039706	ENSG00000265210	MIR4486	microRNA 4486	ncRNA
hypo92	chr12:65154128-65154677	intron (NM_001330187, intron 1 of 13)	NM_001330187	23329	NM_015279	ENSG00000111490	TBC1D30	TBC1 domain family member 30	protein-coding
hypo93	chr12:120807885-120808434	Intergenic	NM_002442	4440	NM_002442	ENSG00000135097	MSI1	musashi RNA binding protein 1	protein-coding
hypo94	chr19:16242839-16243388	exon (NM_005370, exon 8 of 8)	NR_111903	84941	NM_032855	ENSG00000196684	HSH2D	hematopoietic SH2 domain containing	protein-coding
hypo95	chr22:51017796-51018345	promoter-TSS (NM_001145134)	NM_001145134	1375	NM_004377	ENSG00000205560	CPT1B	carnitine palmitoyltransferase 1B	protein-coding
hypo96	chrX:48272796-48273345	Intergenic	NM_001040612	548313	NM_001034832	ENSG00000269791	SSX4B	SSX family member 4B	protein-coding
hypo97	chrX:48272807-48273356	Intergenic	NM_001040612	548313	NM_001034832	ENSG00000269791	SSX4B	SSX family member 4B	protein-coding
hypo98	chrX:49645411-49645960	exon (NM_001145073, exon 1 of 1)	NM_001145073	389856	NM_001145073	ENSG00000273820	USP27X	ubiquitin specific peptidase 27, X-linked	protein-coding
hypo99	chr12:110319745-110320294	Intergenic	NM_016433	51228	NM_016433	ENSG00000139433	GLTP	glycolipid transfer protein	protein-coding
