# Supplementary figures and images for: Genome-Wide Plasma Cell-Free DNA Methylation Profiling Identifies Potential Biomarkers for Lung Cancer
Source: Hindawi journal article supplement (doi:10.1155/2019/4108474), 2019-02-05

Chromosome

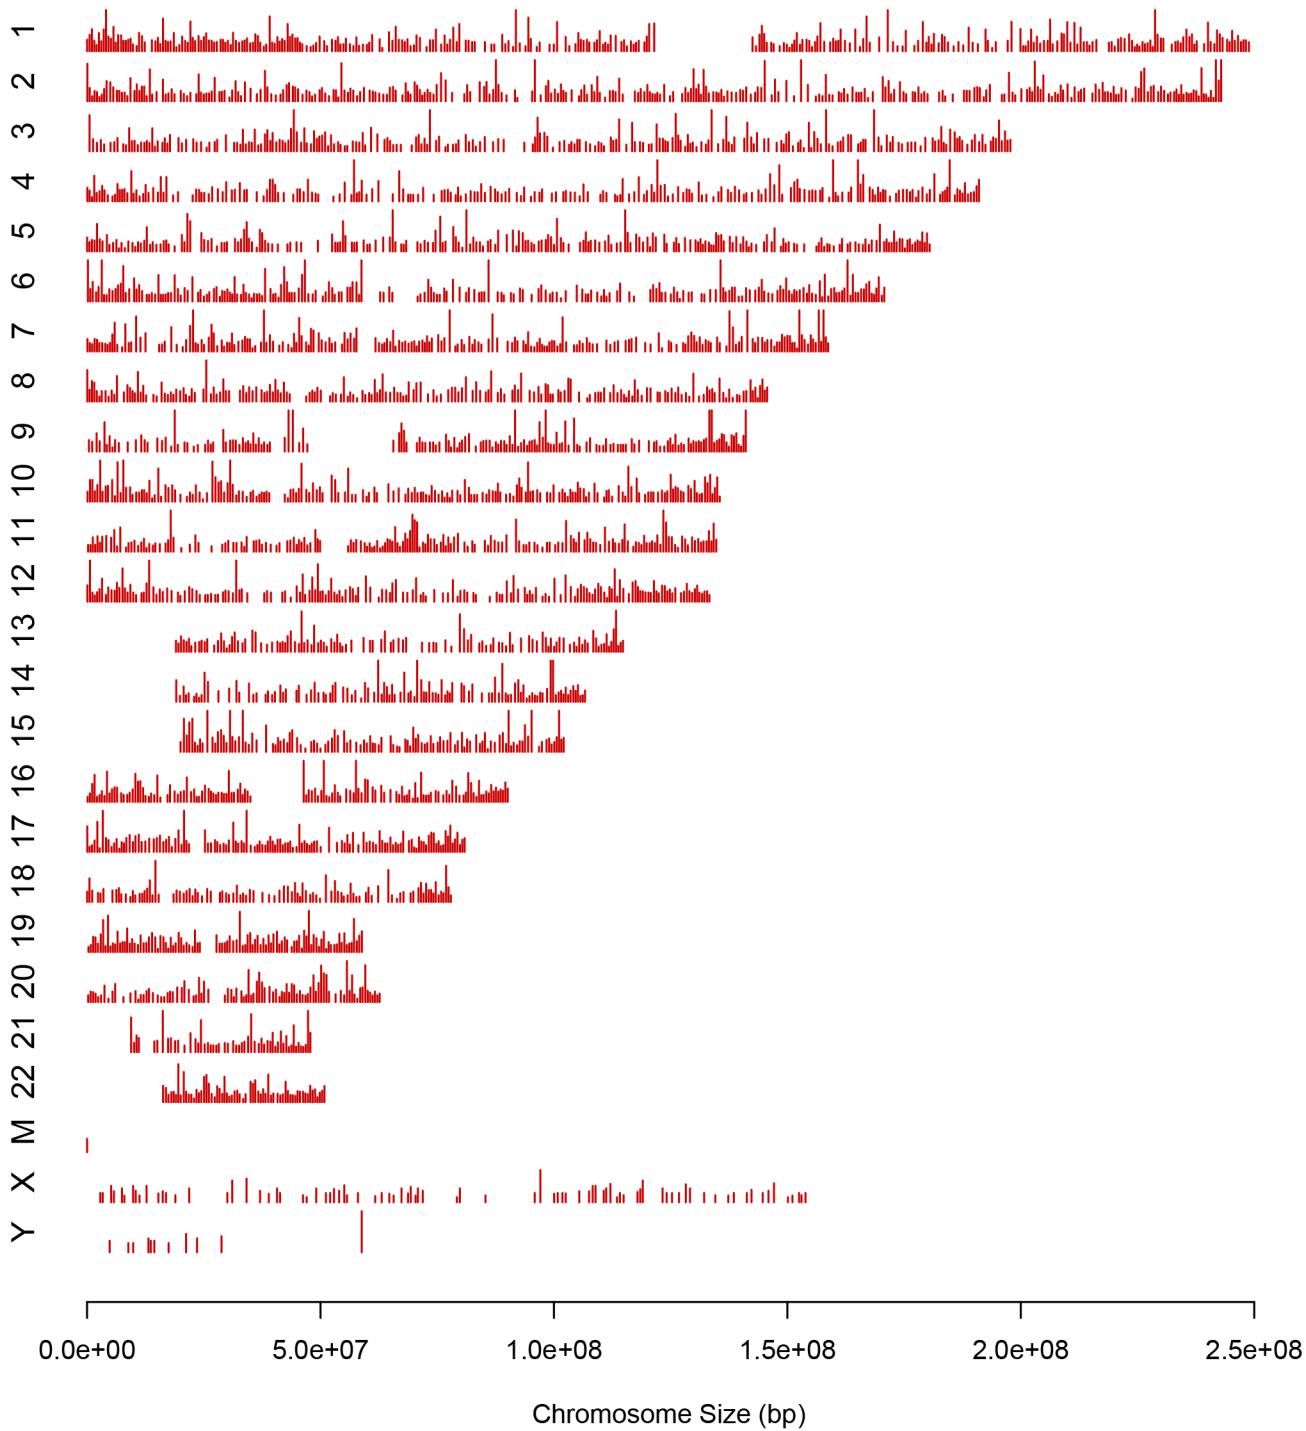

Supplement: f1 [file 4108474.f1.zip]
